# Supplementary material
Source: PubMed Central journal article supplement (PMC1475499)
Supplement: plntcell_tpc.106.041665_1.pdf [file plntcell_tpc.106.041665_1.pdf]

## Supplemental Figure 1. Multiple alignments for Figure 1.

### A. Homeobox-leucine zipper protein 1 (HAT1) / HD-ZIP protein 1

```

F.m00070 : --MGKDDLGLSLSLGFAQNHPLQNLKPTSSPMSNHQMF PWNQTEVSSSNHQNHQSLRKKIDVNSFPSTVLELE : 71
At4g17460 : MMMKEDLGLSLSLGFAQNH-PLQNLKPTSSPMSNLMQMF PWNQTEVSSSDQKQQLRKKIDVNSLPTVDLE : 72
D.m00018 : --MGKEDLGLSLSLGFAQTHHPLKLNLNPTSSISNLQMF PWNQTEVSSSDHQNQFFTKIDVNSLPTVHLE : 71
B.m00025 : --MGKEDLGLSLSLGFSQHN-----NPSSTISNNLHRFPWNQTEASTSD-----LKKIQVNTLPTVDCE : 58
C.m00036 : MMMRKEIDLGLSLSLGLSQDHTPLQ-SONPNSSTISNNLHRFPWNQTEASTSD-----LKKIDVNSLPTVDCE : 66
At5g47370 : MMMKEDLGLSLSLGFSQHNPLQNLNPNSSLSNNLQRLPWNQTEPDTSD-----LKKIDVNSFPSTVNC : 67

F.m00070 : EETGVSSSNSTISSTVSGKRRS-BRQGS-----G---DDL----- : 102
At4g17460 : EETGVSSSNSTISSTVSGKRRSBRREGTSGGGCG---DDLDTLDRSSSRGTSDEEEDYGGETCRKKLRRLSKD : 142
D.m00018 : EETGVSSSNSTISSTVSGKRRS-BREGTS-GGAG---DDLDTLDRSSSRGTSDEEEDHGGEACRKKLRRLSKD : 139
B.m00025 : EEAGVSSSNSTISSTISGGKRS-BREGT-----DEEDAGGETSRKKLRRLSKD : 105
C.m00036 : EETGVSSSNSTISSTISGGKRS-BREGIS-----EHDEITPDRGYSRGNSDEEED-GGETSRKKLRRLSKD : 129
At5g47370 : EDTGVSSSNSTISSTISGKRS--BREGISGTGVGSGDDHDEITPDRGYSRGTSDEEED-GGETSRKKLRRLSKD : 137

F.m00070 : -----160-----KLGLTARQVEVMFQNRRTARTRKQTEVDCBYLKRCVEKLTTEBNRRLEK : 150
At4g17460 : QSAVLEDTFKEHNTLNPKQKLALARKKLGLTARQVEVMFQNRRTARTRKQTEVDCBYLKRCVEKLTTEBNRRLEK : 215
D.m00018 : QSAVLEDTFKEHNTLNPKQKLALARKKLGLTARQVEVMFQNRRTARTRKQTEVDCBYLKRCVEKLTTEBNRRLEK : 212
B.m00025 : QSAFLEDTFKEHNTLNPKQKLALARKKLSMTARQVEVMFQNRRTARTRKQTEVDCBYLKRCVEKLTTEBNRRLOK : 178
C.m00036 : QSAFLEDTFKEHNTLNPKQKLALARKKLNLTARQVEVMFQNRRTARTRKQTEVDCBYLKRCVEKLTTEBNRRLOK : 202
At5g47370 : QSAFLEDTFKEHNTLNPKQKLALARKKLNLTARQVEVMFQNRRTARTRKQTEVDCBYLKRCVEKLTTEBNRRLOK : 210

F.m00070 : EAELRLAKKLS PGLYGRMS PPTLLMCPSCERVGGP--SNH--SQRSVSLNPWL----QMAHGSTFDVVKHPRS : 215
At4g17460 : EAELRLAKKLS PRLYGRMS PPTLLMCPSCERVAGPSSSNH--NQRSVSLSPWL----QMAHGSTFDVVMRPRS : 282
D.m00018 : EAELRLAKKLS PRLYGRMS PPTLLMCPSCERVAGP--SNH--NQRSVSLSPWL----QMAHGSTFDVVMRPRS : 277
B.m00025 : EAMELRITLKLSPQFYQMT PPTLLMCPSCERVAGP--SNHHQTHREVAINPMVPRAGQVAHGLDFBALRS-- : 248
C.m00036 : EAMELRITLKLSPQFYQMT PPTLLMCPSCERVAGP--SNHHQTHREVPVMPVWVACAGQVTHGLDFBALRPRS : 274
At5g47370 : EAMELRITLKLSPQFYQMT PPTLLMCPSCERVGGPSSSNHHHNRHREVPVMPVWVACAGQVAHGLDFBALRPRS : 283

```

## B. Nuclear RNA-binding protein

```

At5g47210 : MASLNPRDLLGDDAEDPSQLAVALSQKVEKAAAVQPPKAAKFPTRPAPPSQAVRESRNAPQCGRGEGGRRG : 72
A.m00058 : MSTLNPRDLLGGDAEDPSQIVVLSLPKKVEK-EAPAPQAKGAKLQTRQPPTSQAVRESRNAPSGVRGGGGGG : 70
B.m00054 : MASLNPRDLLGDDAEDPSQIVLSLPLKVEK-TAPVQPAKAAKFPTRPSPPSQAVRESRNAPSGGRGC--- : 67
At4g17520 : MASVNPRLDLLDDAEDPSQIVASKPLKVV--VAPVQTAKSCKMPTKPPPSQAVREARNAPGG-GRCA-GRGG : 68
D.m00022 : MATVNPRLDLLDDTEDIHKKVAAKPLKSKR-TAPVQL---GRLPTKPLPPSQAVREGKNGPGGGGRRG--- : 65
E.m00046 : MATLNPRDLLDDAEDPSQLAAAKPLKVEK-AAPAQ---AKLPSKPLPPSQAVREGKNGPGG--GSGG---- : 63

At5g47210 : GFSRGRG--NGGYNRDRNRNDAPGNENGFSGGYR-RPSEADAGASRGGSVGGYR---VGGREGPRRGGVAN-G : 139
A.m00058 : GGCACRGPFRGSFN-----PGCD-----RPHDLKDCER---TSCFRRYRESGRRGQ-RGCGPAN-G : 121
B.m00054 : -----GSPRGSFN-----PGCN-----RPHDPKDCFKDERNNGGFRGHRESGRRGCHIGGFAN-G : 116
At4g17520 : SYGRGG---RGGNNRDRNRNDGPNENGYGGY-RRSEEGDCARRCGPVGGYR-----GDRRGSYSNCG : 128
D.m00022 : ---CHCR---SGGFNREPRNDGPNENGYVGGY-RRSEEGDCARRCGSVGGYR-----GRGCRRGFNS-G : 124
E.m00046 : ---RAR---SGGFN---RNDAPANENGYGGY-RRSEEGDCRRCGSVGGYR-----GRSGRRGGYNN-G : 118

At5g47210 : ESGDVEPRRNMDRHSRTGHGTGMKRNGEGRGNWGTEDDDIPPTSEEPTEVEKSPVABKQGGEDETPEAKRE : 212
A.m00058 : RAGD---CRVFERRSGTGRGNDLKREGGGRGNWGTPEDDIPPTBEATEVEKSPVABKKEGGEDDTDAKRD : 190
B.m00054 : KTG DVEPRRVYDRRSGTGRSNDVKREGGGRGNWGTPEDDIQPATEEPTTEVEKSPVABKKEGGEDATDAKKE : 189
At4g17520 : DSGDSEPRKNDRHSRTAYGNEDKRDGAGRANWGTODDITPVTEESTAVVDKNLTVBKODGEGEATDAKNE : 201
D.m00022 : ESGDFERPRRNEDRQSGTGHGNGPKRDGAGRGNWGTNEDEIPPVTEESAIVVEKSLAABKEG---EATDANKE : 194
E.m00046 : ESGDFERPRRNMDRQSGAAHGNEPKRDGAGRGNWGTEDDEIPPVTEESAIVVEKDLAVBREG---EATDANKE : 188

At5g47210 : LTAEEKQKEAEAEAREMTLEEVKILEEKKKALQATKVEERKVDTKVFE SMQQLSNKKNTPDEEIFIKLGS D : 285
A.m00058 : PPADGKKEKEPED---KEMTLEEVKILEEKKKALQATKVEERKVDTKVFE SMQQLS S KKNTPNDEEIFIKLGS D : 260
B.m00054 : AP---EVEQEPED---KEMTLEEVKILEEKKKALQATKVEERKVDTKVFE SMQQLSNKKNTPNDEEIFIKLGS D : 256
At4g17520 : TPAE-KAEKPED---KEMTLEEVKILEEKKKALQATKVEERKVDTKVFEAMQQLS S KKNTPNDEVEVFIKLGTE : 270
D.m00022 : TPVEEKAE--PED---KEMTLEEVKILEEKKKALQATKVEERKVDTKVFEAMQQLS S KKNTPNDEVEVFIKLGTE : 262
E.m00046 : TPVEAQEKEPED---KEMTLEEVKILEEKKKALQATKVEERKVDTKVFEAMQQLS S KKNTPNDEVEVFIKLGTE : 258

At5g47210 : KEKRKDAT---EKAKKSLSTINEFLKPADGKRYNRRGGGSRG-R-----GGRGGRG----- : 331
A.m00058 : KDKRKDAAEKKEKAKKSLSTINEFLKPADGERYNRRGGGYRG-RGGRN-----GGRGGRDEKVN----- : 317
B.m00054 : KDKRKDAAEKKEKAKKSLSTINEFLKPADGERTYNNRRGGYRG-R-----GGRGGRDGVN----- : 308
At4g17520 : KDKR--ITEREEKTRKSLSTINEFLKPADGKSYNRRGGYQGR-----GGRGGRREGNQRDGGRNLRE : 330
D.m00022 : KDKR--PVEREEKTKKSLSTINEFLKPADGERY---RGGYRGREGR-----GGRGGRREGAEC-RGRGPRG : 321
E.m00046 : KDKR--PVEREEKTKKSLSTINEFLKPADGESY---RGGYRGGRASRGPRGADRGGRGPRGADR--GGRGPRG : 325

At5g47210 : -----EGGNQRYAKE---AAPAIGDTAQFPPLG- : 357
A.m00058 : -----EG-----APPAIGDQAQFPPLGK : 336
B.m00054 : -----GGGNQRNGGAS--APPAIGDQAQFPPLAS : 336
At4g17520 : -----GGRNQRDGAAAQAPT PAIGDQAQFPPLGK : 360
D.m00022 : AD-----GGGNQRAAAPKRVAPAPKIEDAAQFPPLGK : 353
E.m00046 : DDRGGRGPRRNDGGGEQKAAAPKRVAPAPKIEDAAQFPPLGK : 367

```
