# Supplementary material
Source: PubMed Central journal article supplement (PMC1475499)
Supplement: plntcell_tpc.106.041665_3.pdf [file plntcell_tpc.106.041665_3.pdf]

## Supplemental Figure 3. Multiple alignments for Figure 3.

### Ethylene-responsive element-binding protein

```

At4g17500 : MSMTADS---QSDYAFLESIRRHLL--GESEPIIESTASSVTQSCVGTGQSIKVPYGRNPSFKLYPSCFTES : 67
B.m00042 : MYGQGEIMAATETEYAVLESIRRHLL--GGETELQFSESIPSS-----SCFTES : 46
At5g47220 : MYGQCNI---ESDYALLESIIRHLLGGGENELRLNESTPS-----SCFTES : 44
A.m00057 : MYGQSEV---ESDYALLESIIRRHLL--GGEAELRFAESIPI-----SCFTES : 42
At5g47230 : MATPNEV-----SALWFIEKHLL--DEASPV---ATDP---MMKHESSESATESSSDSSSIIPGSSSSS : 55
B.m00034 : MANPSEA-----SALRFIEKHLL--DELSPV---ATDR---WMIHE-SAATESSDTSPTIFGSP---P : 51
C.m00062 : MANPSEV-----SSALWFIEKHLL--DVVSPV---AKDR---WMIHE-SAAKDSSEFDSSPMIPGSSSSS : 55
At4g17490 : MATPNEV-----SALFLIKKYL--DELSPLPTATTNR-----WMND-----FTSF--D : 41
E.m00030 : MATPSEA-----SALSFIKKHLL--DESSPLPKVTTNP---WIASE-----TISNFSIFGSP--D : 49

At4g17500 : WGDLPLEKNDSEDMLV-----YCILNDAFHGWEPESS-SSSDE----- : 105
B.m00042 : WGDLPLEKNDSEDMLV-----YCVLNDAFNRAACETSSPSDDLSCLSDFLDKPPANPS----- : 99
At5g47220 : WGDLPLEKNDSEDMLV-----YCLLNDAFHFDIT-----ESSDLSCLFDF----- : 83
A.m00057 : WGDLPLEKNDSEDMLV-----YCLLNDPYDTS-----SSDLSCLTEFVDLETSSKR----- : 90
At5g47230 : FAPIDESESVCKPEIIDLDTPRSMEFLSIPEFSEV---SVSDPEFKPKNQONQFEPPELKS----- : 115
B.m00034 : AAPIEFSEFENKPEIIDLSTPRFVDLISPPFPEVSEV---SLSDPELKPSTYQTNQFEPPEIKTQ----- : 112
C.m00062 : SAPIDCSESEIKPEVIDLSTPRFMDLISPPSEPTGVSV---SVSDPEFKPTFQTVNQFEPPEFKQIPCASDDSH : 127
At4g17490 : QTGFDFSEFETKPEIIDLVTPK-PEIFD--FDVRSSEIPSESNDSFTFQSNPPRVTVQ----- : 95
E.m00030 : QTGFDFSEFETKPEITDLVTHRFTHSFESEPEANAEIQLASSEFTFQSNPRGVSGPASR----- : 109

At4g17500 : RSEFPVYKTIETPE-----SFAAVDSVPVKKEKTSVPSAAVTAAGKPKHYRGVRRPWWGKBAAEIRDPKNGARV : 173
B.m00042 : HNDFFPAVRMEPAE-----NLAAVLEKPKPE-----VAP---PAKPKHYRGVRRPWWGKBAAEIRDPKNGARV : 158
At5g47220 : ---PAVVEPTE-----NFTAMEEKPKK-----AIPVTEAVKAKHYRGVRRPWWGKBAAEIRDPKNGARV : 142
A.m00057 : PSDSPVARAEPAE-----SFAAAVVEKQK-----AATAKPKHYRGVRRPWWGKBAAEIRDPKNGARV : 148
At5g47230 : QIRKPPPKRISLPAKTEWIIQFAAETTKPEV-----TKP---VSEEEKHYRGVRRPWWGKBAAEIRDPKNGARV : 181
B.m00034 : SNRKPPPKRISVPTKTEWIIQF---DPOPEV---TKPKQAIAEKPKHYRGVRRPWWGKBAAEIRDPKNGARV : 177
C.m00062 : SNRKPPPKRISVPTKTEWIIQF---DPOPEV---TKPVQDAEEQRHYRGVRRPWWGKBAAEIRDPKNGARV : 192
At4g17490 : SNRKPPPKRISVPTKTEWIIQFATGPKPEL---PVPV-VAABEERHYRGVRRPWWGKBAAEIRDPKNGARV : 162
E.m00030 : SNRKPPPKRISVPTKTEWIIQFATEVPOPEQ-----LPVHVAAEERHYRGVRRPWWGKBAAEIRDPKNGARV : 176

At4g17500 : WLGTFETAEDAALAYDRAAARMRGSRALLNFPPLRVN-----SCE-----PDPVRIKSK--RSS : 224
B.m00042 : WLGTFETAEDAALAYDRAAARMRGSRALLNFPWRVN-----SCE-----PDPVRIKSK--RSY : 209
At5g47220 : WLGTFETAEDAALAYDRAAARMRGSRALLNFPPLRVN-----SCE-----PDPVRIKSK--RSS : 193
A.m00057 : WLGTFETAEDAALAYDRAAARMRGSRALLNFPPLRVN-----SCE-----PDPVRIKSK--RSY : 199
At5g47230 : WLGTFDTAIEAARAYDQAARPLRGRSKALLNFPLEVGKWKPRAD-EGE---KRRKRDD--DEKVTVVAVKVLKTE : 248
B.m00034 : WLGTFDTAIEAARAYDQAARPLRGRSKALLNFPLEVGKWKPRAD-EGE---KRRKRDD-ELEDVTVVAVKVLKTE : 246
C.m00062 : WLGTFDTAIEAARAYDQAARPLRGRSKALLNFPLEVGKWKSRKADGE---KRRKRDEIEDDHVAVVAVKVLKTE : 262
At4g17490 : WLGTFETAIEAARAYDQAARPLRGRSKALLNFPLEVDKWNPRAE-DGRGLYNKRRKRDG-EEEEVTVVAVKVLKTE : 233
E.m00030 : WLGTFDTAIEAARAYDQAARPLRGRSKALLNFPLEVGKWNQRAD-MCQ---NRRKRDDG-EGEVTVVAVKVLKTE : 244

At4g17500 : FS-----SSNENCAPKKRRRTVAAGGGMKGLTVKCEVVEVARGDRLLML : 268
B.m00042 : TSS-----SSSDNCTPKRRRN---TEEVPSSELQVKCEVA----- : 240
At5g47220 : SSSSSSSSTSSSENGLKRNRK---AENLTSSEVVQVKCEVGDTRVDELLVS : 243
A.m00057 : TSS-----SSSENKLRNRK---TENVPSEFQVKCEV----- : 232
At5g47230 : QSDVNGGETFPVFTSNLTELCDWDLTGFLNFPLLSPLSPHPPFYSQLTWV : 300
B.m00034 : QNV---NGKETFLPKSDLTELYDWDLTGFLNFPLLSPLSPRPSFNYSSELTWV : 296
C.m00062 : QSV---NGKEAENLTFCDWDMGLNFPLLSPLSPHPSFYSQLTWV : 307
At4g17490 : ESDVSG---GENVESCLTAIDDWDLTEFLSMPLLSPLSPHPPFYSQLTWV : 282
E.m00030 : ESH-----AVETETSLLTAVDDWDLTELLSMPLLSPLSPHPPFYSQLTWV : 290

```
