# Supplementary material
Source: PubMed Central journal article supplement (PMC1475499)
Supplement: plntcell_tpc.106.041665_4.pdf [file plntcell_tpc.106.041665_4.pdf]

Supplemental Figure 4. Multiple alignments for Figure 4.

Palmitoyl protein thioesterase family

```

                *           20           *           40           *           60           *
At4g17470 : -MEKSFQRSALL--VTLTSLFFFSIPVSLVPPVLFHFGFGECSNDKVSNLTQFLLNHSYPTQVEIGDG--V : 68
At4g17483 : -MEKYSRRSILLSTVVAAVLFLSLIPVSIISIPFILFHGIGDKCS-GGVSNFTQLLTNLSGSPCYGLEIENG--E : 69
D.m00019 : MVEETRER-----EKKDYIDLNLMANILLRPVLTLTVAAV--- : 35
E.m00589 : -MAKSLQRPFLLLT-VAAVLFSTVSFSNAIPFVVFHFGIGDQCS-GGVSNFTQLLSSVSGSPGSGLEIENG--E : 68
F.m00071 : -MDNSFKRSALF---ATFAIFFFIIPVSIISVPPFHFHGIINDQCSSVEARSPTQLLRNLSGSPCYGLEIENG--E : 67
At4g17480 : -MEKSFQKSALL---VTLTSLFFFIIPVSIISVPPFILFHGIRDQCSNGVSSVQVLLSNLSSSHSGSLEIENG--E : 67
At5g47350 : -MEKGLTMSCVL---VVVAFLAMVHVSVSVPVVFPEIGTQCSAPNANFTQLLNLNLSGSPGPIEIEENPI : 69
B.m00415 : MY----- : 2
At5g47330 : MGEKGLKRSQVA---VVVALLTMVHVSVSVPFIMLHGISAQCSNARDANFTQLLTNLSGSPGPIEIEENG--V : 68
At5g47340 : -MEKGLKRSQVM---VVVAFLAKVDISVSVPPFIMLHGIASQCSDDTNANFTQLLTNLSGSPGPIEIEENG--V : 67
B.m00414 : MFCMRKRRSGLA---VALVFLALVQVSVSVPPFIVLHGIAASCSQGKEANFTQLLTNLSGSPGPIEIEENG--K : 68
C.m00448 : -MEK--KRFGLA---AAVVFALALVQVSVSVPPFIVLHGIAAACESEGKEANFTQLLNSFGSPGPIEIEENG--E : 65

                80           *           100          *           120          *           140
At4g17470 : KDSLFLMPLRQQAASIAACEKVRQMKELSEQYNIIVAESQGNLVARGLIEFCDDNAPPVINYVSLGGPHAGVAaip-- : 139
At4g17483 : KDSWFMPLRKQTSVACEKVRQMKELSQYNIIVAESQGNLVARGLIEFCDDNAPPVINYISLGGPHAGIAKIP-- : 140
D.m00019 : -----LFSTVPAASNEKVRQMKELSQYNIIVAESQGNLVARGLIEFCYDAPPVINYVSLGGPHAGVAaip-- : 99
E.m00589 : KDSWFMPLVQQAASVACEKVRQMKELSQYNIIVAESQGNMVARGLIEFCDDAPPVINYVSLGGPHAGIAAVP-- : 139
F.m00071 : HDSMYMPLMQQAASIAACEKVRQMKELSQYNIIVAESQGNMVARGLIEFCDDAPPVINYVSLGGPHAGSIIP-- : 138
At4g17480 : QDSVMTPLTQQAASVACEKVRQMKELSQYNIIVAESQGNLVARGLIEFCDDNAPPVINYISLGGPHAGSDIP-- : 138
At5g47350 : GASWLIPLTQQAASVACEKVRQMKELSQYNIIVGRAQGLVARGLIEFCDEGPPVINYISLGGPHAGTADLL-- : 140
B.m00415 : ----- : -
At5g47330 : ADSWMLPLTRQAEIACEKVRQMKELSQYNIIVGRSQGNLVARGLIEFCDEGPPVINYISLGGPHAGISSVP-- : 139
At5g47340 : INSMFLPLTQQAASVACEKVRQMKELSQYNIIVGRSQGNLVARGLIEFCDEGPPVINYISLGGPHAGISSLPRG : 140
B.m00414 : RDSWFMPLMKQTEIACEKVRQMKELSQYNIIVGRSQGNLVARGLIEFCDEGPPVINYISLGGPHAGISSVP-- : 139
C.m00448 : LDSWFMPLAKQAEIACEKVRQMKELSQYNIIVGRSQGNLVARGLIEFCDEGPPVINYISLGGPHAGISSVP-- : 136

                *           160          *           180          *           200          *           22
At4g17470 : EGC--DS---AFCILMKAFFAV--TSDFAQDHTAPSGYVKKPMEIKNYLEHSSKYLKPLNNERPGEKNSTFRDR : 206
At4g17483 : KCN--SG---PICAIAGEALLKLEVVTDVFQDHTAPSGYIKIPGEISKYLEHSSKYLKPLNNERPDERNSTFRDR : 208
D.m00019 : KCS--SG---PFCATAEALMKLEIINDVFQDHTAPSGYVKIPGEMTKYLDHSSKYLKPLNNERPQQRNSTFRNR : 167
E.m00589 : KCG--DG---PKCAIAEDILKLEIINDVFQDHTAPSGYVKIPGEMTKYLDHSSKYLKPLNNERPDERNSTFRDR : 207
F.m00071 : KCP--AGASYPLC---QLQETEVYSDSACDHTAPCGYIKLASEISEYMEHSSKYLKPLNNERPDERNSTFRDR : 205
At4g17480 : KCN--S---TLC---ELLKTAVVTDVFQDHTAPSGYIKIPTDIKDYLEHSSKYLKPLNNERPDERNSTFRDR : 201
At5g47350 : RCN--TSC---LICDIANGICKENPDSDFQDHTAPSGYFKNPKNVTGYLKDCCYLKPLNNERPYERNNTYKDR : 209
B.m00415 : -----IFIRFLTESL---FYWFSQEIINKYLEHSSKYLKPLNNEIPQQRNSTYKDR : 48
At5g47330 : MCG--SG---LFCCKLADELIKGDIYSDFIQDHTAPSGYLKIPDMDTKYLGSSKYLKPLNNEIPQQRNSTYKDR : 207
At5g47340 : LCGLTSD---PACKFENLIKCALYSETIQDHTAPSGYIKIPNDMKQYLERSSKYLKPLNNEIPQQRNSTYKDR : 210
B.m00414 : LCG--NG---SLCEIADKLIKSEIYSDFIQNHDLAPSNYLKIP----- : 177
C.m00448 : MCG--SG---LWCETIADDELIKSDIYSDFIQDHTAPSGYLKIPTEMKKYLEHSSKYLKPLNNEIPQQRNSTYKDR : 204

                0           *           240          *           260          *           280          *
At4g17470 : FTSLQNLMLIMFQNDTILVPRETSDFCFYFDGASSSTPVLPPQKTRLYTEDWIELKTLDDAGKVRFIIVPGECH : 279
At4g17483 : FTNLHNLMLVLMFESDTMLIPRETAFDFCFYDEDEG--FDTLLSAQQTRLYREDWIELKALDAAGVKVFESVLEDH : 279
D.m00019 : FMSLHNLMLVLMFQNDTILVPRETSDFCFYTDG--FDSLLSTQQTRLYTEDWIELKALDDVGVKVFVSVSDH : 238
E.m00589 : FTSLHNLMLVLMFQNDTILVPRETSDFCFYTFEGA--FGTLLTQQTRLYTEDWIELKALDDVGVKVFVSVSDH : 278
F.m00071 : FTSLHNLMLVLMFEGDTIVVPRETFDFCFYDEGA--TAPLLPQKTRLYTEDWIELKTLDDAGVKVFVVPEDH : 276
At4g17480 : FTSLHNLMLVLMFEGDAVVIPIESSDFCFYFDGA--STPLLSQQTRLYTEDWIELKTLDAARKVKFVSVPEBH : 272
At5g47350 : FASLQNLMLVLFENDTIVVPIESSDFCFYFDGD--LTHVLPVQETRLYTEDWIELKALVAVAGKVFVNVVTEDH : 280
B.m00415 : FTSLHNLMLVLFQDDKRVIVPQDSSDFCFYFDGA--FKPLLSAQQTRLYTEDWIELKTLDDAGVKVFVVKCAH : 119
At5g47330 : FTSLHNLMLIKFQGDKRVIVPQDSSDFCFYFDGE--FEPLLSAQQTRLYTEDWIELKTLDDAGVKVFVVAEBH : 278
At5g47340 : FTSLHNLMLVLFQDDKRVIVPQDSSDFCFYFDGE--FETLLSANQTRLYTEDWIELKTLDDAGVKVFVVPGECH : 281
B.m00414 : -----FRRI----- : 181
C.m00448 : FASLHNLMLIMFEDDKRVIVPQDSSDFCFYFDGD--FGPLLVRETRLFKEDWIELKPLVDTGKVFVVIDSAH : 275

                300           *           320          *           340
At4g17470 : IEITEEDLVKVVVPLQNESL-----FSSEH-----ETI----- : 308
At4g17483 : LSI SDEEVVEFVVPYLMONCM----- : 300
D.m00019 : LMIAYNDVVKVVVPLMA----- : 256
E.m00589 : LMIAFQDVVKVVVPLMQIS----- : 298
F.m00071 : LEMAHDDVVKVVVPLQNQFA-----FS----- : 299
At4g17480 : LRIAQDDVVRHVVPYLNQPA-----SMSED-----LEILHL----- : 304
At5g47350 : LIMADEDLVKVVVPLLQDQSQSAPPR-LNRKT-----KEPLHP----- : 316
B.m00415 : IIMADLDVVKVVVPLLNQPSFQQRFRNKT-----KETLRP----- : 156
At5g47330 : IRNVDEDVVRHVVPYLNQDQSSVQS-FNRKT-----KQPLHA----- : 314
At5g47340 : VRMAEEDLVKVVVPLQNQQAQAQ-SFNRKT-----KEPLHP----- : 317
B.m00414 : -----IEKFITIYLMK-----FLSQI----- : 198
C.m00448 : LRMSNVDLVKVVVPLQNQSSSEQKIQPNQGAFAYLKEKISHHSYVIVKPP : 328

```
