# Supplementary material
Source: PubMed Central journal article supplement (PMC1475499)
Supplement: plntcell_tpc.106.041665_6.pdf [file plntcell_tpc.106.041665_6.pdf]

Supplemental Table 1. Summary of BLASTn analysis with contig sequences deconstructed to overlapping 1 kb segments

CONTIG A

| Start | Stop  | Score      | Gene model  | Description                                                                    | Classification                     |
|-------|-------|------------|-------------|--------------------------------------------------------------------------------|------------------------------------|
| 0     | 1000  | E=7.0e-55  | At5g47710.1 | MCA23.3, C2 domain-containing protein, GO:0005554 [molecular_function unknown] | Additional collinear gene fragment |
| 500   | 1500  | E=2.7e-68  | At5g47710.1 | MCA23.3, C2 domain-containing protein, GO:0005554 [molecular_function unknown] | Additional collinear gene fragment |
| 1000  | 2000  | E=7.5e-16  | At5g47710.1 | MCA23.3, C2 domain-containing protein, GO:0005554 [molecular_function unknown] | Additional collinear gene fragment |
| 2500  | 3500  | E=2.7e-15  | At5g47690.1 | MNJ7.28, expressed protein, GO:0005554 [molecular_function unknown]            | Conserved collinear gene           |
| 3000  | 4000  | E=9.8e-35  | At5g47690.1 | MNJ7.28, expressed protein, GO:0005554 [molecular_function unknown]            | Conserved collinear gene           |
| 3500  | 4500  | E=3.2e-24  | At5g47690.1 | MNJ7.28, expressed protein, GO:0005554 [molecular_function unknown]            | Conserved collinear gene           |
| 4000  | 5000  | E=2.4e-18  | At5g47690.1 | MNJ7.28, expressed protein, GO:0005554 [molecular_function unknown]            | Conserved collinear gene           |
| 4500  | 5500  | E=1.3e-90  | At5g47690.1 | MNJ7.28, expressed protein, GO:0005554 [molecular_function unknown]            | Conserved collinear gene           |
| 5000  | 6000  | E=9.2e-105 | At5g47690.1 | MNJ7.28, expressed protein, GO:0005554 [molecular_function unknown]            | Conserved collinear gene           |
| 5500  | 6500  | E=2.4e-71  | At5g47690.1 | MNJ7.28, expressed protein, GO:0005554 [molecular_function unknown]            | Conserved collinear gene           |
| 6000  | 7000  | E=6.9e-78  | At5g47690.1 | MNJ7.28, expressed protein, GO:0005554 [molecular_function unknown]            | Conserved collinear gene           |
| 6500  | 7500  | E=2.9e-43  | At5g47690.1 | MNJ7.28, expressed protein, GO:0005554 [molecular_function unknown]            | Conserved collinear gene           |
| 7000  | 8000  | E=4.6e-42  | At5g47690.1 | MNJ7.28, expressed protein, GO:0005554 [molecular_function unknown]            | Conserved collinear gene           |
| 7500  | 8500  | E=1.9e-47  | At5g47690.1 | MNJ7.28, expressed protein, GO:0005554 [molecular_function unknown]            | Conserved collinear gene           |
| 8000  | 9000  | E=2.3e-68  | At5g47690.1 | MNJ7.28, expressed protein, GO:0005554 [molecular_function unknown]            | Conserved collinear gene           |
| 8500  | 9500  | E=9.7e-54  | At5g47690.1 | MNJ7.28, expressed protein, GO:0005554 [molecular_function unknown]            | Conserved collinear gene           |
| 9000  | 10000 | E=6.4e-    | At5g47690.1 | MNJ7.28, expressed protein, GO:0005554 [molecular_function unknown]            | Conserved                          |

|       |       |         |             |                                                                        |                |
|-------|-------|---------|-------------|------------------------------------------------------------------------|----------------|
|       |       | 46      |             | unknown]                                                               | collinear gene |
|       |       | E=2.8e- |             | MNJ7.28, expressed protein, GO:0005554 [molecular_function             | Conserved      |
| 9500  | 10500 | 98      | At5g47690.1 | unknown]                                                               | collinear gene |
|       |       | E=1.1e- |             | MNJ7.28, expressed protein, GO:0005554 [molecular_function             | Conserved      |
| 10000 | 11000 | 82      | At5g47690.1 | unknown]                                                               | collinear gene |
|       |       | E=1.4e- |             | MNJ7.28, expressed protein, GO:0005554 [molecular_function             | Conserved      |
| 10500 | 11500 | 32      | At5g47690.1 | unknown]                                                               | collinear gene |
|       |       | E=2.1e- |             | MNJ7.28, expressed protein, GO:0005554 [molecular_function             | Conserved      |
| 11000 | 12000 | 09      | At5g47690.1 | unknown]                                                               | collinear gene |
|       |       | E=9.1e- |             | MNJ7.27, expressed protein, GO:0005554 [molecular_function             | Conserved      |
| 11500 | 12500 | 23      | At5g47680.1 | unknown]                                                               | collinear gene |
|       |       | E=9.1e- |             | MNJ7.27, expressed protein, GO:0005554 [molecular_function             | Conserved      |
| 12000 | 13000 | 23      | At5g47680.1 | unknown]                                                               | collinear gene |
|       |       | E=9.7e- |             | MNJ7.26, CCAAT-box binding transcription factor family protein / leafy | Conserved      |
| 19000 | 20000 | 31      | At5g47670.1 | cotyledon 1-related (L1L), GO:0003700 [transcription factor activity]  | collinear gene |
|       |       | E=2.2e- |             | MNJ7.26, CCAAT-box binding transcription factor family protein / leafy | Conserved      |
| 19500 | 20500 | 89      | At5g47670.1 | cotyledon 1-related (L1L), GO:0003700 [transcription factor activity]  | collinear gene |
|       |       | E=8.4e- |             | MNJ7.26, CCAAT-box binding transcription factor family protein / leafy | Conserved      |
| 20000 | 21000 | 66      | At5g47670.1 | cotyledon 1-related (L1L), GO:0003700 [transcription factor activity]  | collinear gene |
|       |       | E=1.7e- |             | MNJ7.25, DNA-binding protein-related, GO:0003700 [transcription        | Conserved      |
| 20500 | 21500 | 41      | At5g47660.1 | factor activity]                                                       | collinear gene |
|       |       | E=2.4e- |             | MNJ7.25, DNA-binding protein-related, GO:0003700 [transcription        | Conserved      |
| 21000 | 22000 | 55      | At5g47660.1 | factor activity]                                                       | collinear gene |
|       |       | E=1.3e- |             | MNJ7.25, DNA-binding protein-related, GO:0003700 [transcription        | Conserved      |
| 21500 | 22500 | 22      | At5g47660.1 | factor activity]                                                       | collinear gene |
|       |       | E=4.4e- |             | MNJ7.25, DNA-binding protein-related, GO:0003700 [transcription        | Conserved      |
| 22000 | 23000 | 34      | At5g47660.1 | factor activity]                                                       | collinear gene |
|       |       | E=2.8e- |             | MNJ7.25, DNA-binding protein-related, GO:0003700 [transcription        | Conserved      |
| 22500 | 23500 | 23      | At5g47660.1 | factor activity]                                                       | collinear gene |
|       |       | E=5.5e- |             |                                                                        | Conserved      |
| 23000 | 24000 | 21      | At5g47650.1 | MNJ7.24, MutT/nudix family protein, GO:0016787 [hydrolase activity]    | collinear gene |
|       |       | E=6.4e- |             |                                                                        | Conserved      |
| 23500 | 24500 | 53      | At5g47650.1 | MNJ7.24, MutT/nudix family protein, GO:0016787 [hydrolase activity]    | collinear gene |
|       |       | E=2.2e- |             |                                                                        | Conserved      |
| 24000 | 25000 | 83      | At5g47650.1 | MNJ7.24, MutT/nudix family protein, GO:0016787 [hydrolase activity]    | collinear gene |
|       |       | E=1.8e- |             |                                                                        | Conserved      |
| 24500 | 25500 | 55      | At5g47650.1 | MNJ7.24, MutT/nudix family protein, GO:0016787 [hydrolase activity]    | collinear gene |
|       |       | E=2.5e- |             | MNJ7.23, CCAAT-box binding transcription factor subunit B (NF-YB)      | Conserved      |
| 25000 | 26000 | 91      | At5g47640.1 | (HAP3 ) (AHAP3) family (Hap3b), GO:0003700 [transcription factor       | collinear gene |
|       |       | E=7.9e- |             | activity]                                                              | Conserved      |
| 25500 | 26500 |         | At5g47640.1 | MNJ7.23, CCAAT-box binding transcription factor subunit B (NF-YB)      | Conserved      |

|       |       |            |             |                                                                                                                                                                |                          |
|-------|-------|------------|-------------|----------------------------------------------------------------------------------------------------------------------------------------------------------------|--------------------------|
|       |       | 75         |             | (HAP3 ) (AHAP3) family (Hap3b), GO:0003700 [transcription factor activity]                                                                                     | collinear gene           |
|       |       |            |             |                                                                                                                                                                | Inserted fragment        |
|       |       |            |             |                                                                                                                                                                | outside gene models      |
| 27000 | 28000 | E=2.6e-12  | At2g40113.1 | F2711.6, hypothetical protein, GO:0005554 [molecular_function unknown]                                                                                         | Conserved collinear gene |
| 27500 | 28500 | E=1.5e-33  | At5g47630.1 | MNJ7.22, acyl carrier family protein / ACP family protein, GO:0006633 [fatty acid biosynthesis] GO:0000036 [acyl carrier activity]                             | Conserved collinear gene |
| 28000 | 29000 | E=8.7e-42  | At5g47630.1 | MNJ7.22, acyl carrier family protein / ACP family protein, GO:0006633 [fatty acid biosynthesis] GO:0000036 [acyl carrier activity]                             | Conserved collinear gene |
| 28500 | 29500 | E=7.2e-10  | At5g47630.1 | MNJ7.22, acyl carrier family protein / ACP family protein, GO:0006633 [fatty acid biosynthesis] GO:0000036 [acyl carrier activity]                             | Conserved collinear gene |
|       |       |            |             |                                                                                                                                                                | Inserted fragment        |
| 36000 | 37000 | E=1.1e-09  | At5g49590.1 | K6M13.15, hypothetical protein, GO:0005554 [molecular_function unknown]                                                                                        | within model             |
|       |       |            |             |                                                                                                                                                                | Inserted fragment        |
| 38000 | 39000 | E=3.8e-15  | At1g02230.1 | T7I23.19, no apical meristem (NAM) family protein, GO:0007275 [development] GO:0005554 [molecular_function unknown] GO:0003700 [transcription factor activity] | within model             |
|       |       |            |             |                                                                                                                                                                | Inserted fragment        |
| 38500 | 39500 | E=7.4e-07  | At5g35805.1 | MIK22.10, hypothetical protein, GO:0005554 [molecular_function unknown]                                                                                        | outside gene models      |
|       |       |            |             |                                                                                                                                                                | Inserted fragment        |
| 40000 | 41000 | E=1.1e-08  | At1g28410.1 | F3M18.15, expressed protein, GO:0005554 [molecular_function unknown]                                                                                           | outside gene models      |
| 42000 | 43000 | E=1.2e-33  | At5g47620.2 | MNJ7.21, heterogeneous nuclear ribonucleoprotein, putative / hnRNP, putative, GO:0003723 [RNA binding]                                                         | Conserved collinear gene |
| 42500 | 43500 | E=9.2e-101 | At5g47620.2 | MNJ7.21, heterogeneous nuclear ribonucleoprotein, putative / hnRNP, putative, GO:0003723 [RNA binding]                                                         | Conserved collinear gene |
| 43000 | 44000 | E=4.7e-141 | At5g47620.2 | MNJ7.21, heterogeneous nuclear ribonucleoprotein, putative / hnRNP, putative, GO:0003723 [RNA binding]                                                         | Conserved collinear gene |
| 43500 | 44500 | E=7.7e-98  | At5g47620.2 | MNJ7.21, heterogeneous nuclear ribonucleoprotein, putative / hnRNP, putative, GO:0003723 [RNA binding]                                                         | Conserved collinear gene |
| 44000 | 45000 | E=9.8e-24  | At5g47620.3 | MNJ7.21, heterogeneous nuclear ribonucleoprotein, putative / hnRNP, putative, GO:0003723 [RNA binding]                                                         | Conserved collinear gene |
| 44500 | 45500 | E=4.9e-66  | At5g47610.1 | MNJ7.20, zinc finger (C3HC4-type RING finger) family protein, GO:0005515 [protein binding] GO:0008270 [zinc ion binding]                                       | Conserved collinear gene |
| 45000 | 46000 | E=9.7e-49  | At5g47610.1 | MNJ7.20, zinc finger (C3HC4-type RING finger) family protein, GO:0005515 [protein binding] GO:0008270 [zinc ion binding]                                       | Conserved collinear gene |
| 45500 | 46500 | E=7.0e-    | At5g47570.1 | MNJ7.16, expressed protein, GO:0005554 [molecular_function unknown]                                                                                            | Conserved                |

|       |       |         |             |                                                                                                                      |                |
|-------|-------|---------|-------------|----------------------------------------------------------------------------------------------------------------------|----------------|
|       |       | 22      |             | unknown]                                                                                                             | collinear gene |
|       |       | E=3.3e- |             | MNJ7.16, expressed protein, GO:0005554 [molecular_function                                                           | Conserved      |
| 46000 | 47000 | 37      | At5g47570.1 | unknown]                                                                                                             | collinear gene |
|       |       | E=7.1e- |             | MNJ7.16, expressed protein, GO:0005554 [molecular_function                                                           | Conserved      |
| 46500 | 47500 | 13      | At5g47570.1 | unknown]                                                                                                             | collinear gene |
|       |       | E=2.1e- |             | MNJ7.15, sodium/dicarboxylate cotransporter, putative, GO:0017153                                                    | Conserved      |
| 49500 | 50500 | 52      | At5g47560.1 | [sodium:dicarboxylate symporter activity] GO:0006835 [dicarboxylic acid transport] GO:0006814 [sodium ion transport] | collinear gene |
|       |       | E=5.3e- |             | MNJ7.15, sodium/dicarboxylate cotransporter, putative, GO:0017153                                                    | Conserved      |
| 50000 | 51000 | 74      | At5g47560.1 | [sodium:dicarboxylate symporter activity] GO:0006835 [dicarboxylic acid transport] GO:0006814 [sodium ion transport] | collinear gene |
|       |       | E=4.7e- |             | MNJ7.15, sodium/dicarboxylate cotransporter, putative, GO:0017153                                                    | Conserved      |
| 50500 | 51500 | 14      | At5g47560.1 | [sodium:dicarboxylate symporter activity] GO:0006835 [dicarboxylic acid transport] GO:0006814 [sodium ion transport] | collinear gene |
|       |       | E=4.6e- |             | F27F5.24, Expressed protein, GO:0005554 [molecular_function                                                          | Conserved      |
| 51000 | 52000 | 12      | At1g45165.1 | unknown]                                                                                                             | collinear gene |
|       |       | E=1.7e- |             | MNJ7.15, sodium/dicarboxylate cotransporter, putative, GO:0017153                                                    | Conserved      |
| 51500 | 52500 | 22      | At5g47560.1 | [sodium:dicarboxylate symporter activity] GO:0006835 [dicarboxylic acid transport] GO:0006814 [sodium ion transport] | collinear gene |
|       |       | E=4.2e- |             | MNJ7.15, sodium/dicarboxylate cotransporter, putative, GO:0017153                                                    | Conserved      |
| 52000 | 53000 | 86      | At5g47560.1 | [sodium:dicarboxylate symporter activity] GO:0006835 [dicarboxylic acid transport] GO:0006814 [sodium ion transport] | collinear gene |
|       |       | E=7.7e- |             | MNJ7.15, sodium/dicarboxylate cotransporter, putative, GO:0017153                                                    | Conserved      |
| 52500 | 53500 | 164     | At5g47560.1 | [sodium:dicarboxylate symporter activity] GO:0006835 [dicarboxylic acid transport] GO:0006814 [sodium ion transport] | collinear gene |
|       |       | E=9.4e- |             | MNJ7.15, sodium/dicarboxylate cotransporter, putative, GO:0017153                                                    | Conserved      |
| 53000 | 54000 | 78      | At5g47560.1 | [sodium:dicarboxylate symporter activity] GO:0006835 [dicarboxylic acid transport] GO:0006814 [sodium ion transport] | collinear gene |
|       |       | E=4.3e- |             | MNJ7.14, cysteine protease inhibitor, putative / cystatin, putative,                                                 | Conserved      |
| 56000 | 57000 | 29      | At5g47550.1 | GO:0004869 [cysteine protease inhibitor activity]                                                                    | collinear gene |
|       |       | E=4.3e- |             | MNJ7.14, cysteine protease inhibitor, putative / cystatin, putative,                                                 | Conserved      |
| 56500 | 57500 | 29      | At5g47550.1 | GO:0004869 [cysteine protease inhibitor activity]                                                                    | collinear gene |
|       |       | E=4.2e- |             |                                                                                                                      | Inserted       |
| 60500 | 61500 | 24      | At2g22710.1 | T9I22.15, myb family protein, GO:0003677 [DNA binding]                                                               | fragment       |
|       |       | E=4.6e- |             |                                                                                                                      | Inserted       |
| 61000 | 62000 | 36      | At2g22710.1 | T9I22.15, myb family protein, GO:0003677 [DNA binding]                                                               | fragment       |
|       |       | E=1.7e- |             |                                                                                                                      | Inserted       |
| 61500 | 62500 | 07      | At4g08270.1 | T12G13.110, hypothetical protein, GO:0005554 [molecular_function                                                     | fragment       |
|       |       |         |             | unknown]                                                                                                             | within model   |

|       |       |           |             |                                                                                                                                                                                             |                                |
|-------|-------|-----------|-------------|---------------------------------------------------------------------------------------------------------------------------------------------------------------------------------------------|--------------------------------|
| 62000 | 63000 | E=2.4e-09 | At1g62760.1 | F23N19.12, invertase/pectin methylesterase inhibitor family protein, GO:0046910 [pectinesterase inhibitor activity]                                                                         | Inserted fragment within model |
| 62500 | 63500 | E=9.7e-76 | At3g15310.1 | K7L4.11, expressed protein, GO:0000004 [biological_process unknown] GO:0008372 [cellular_component unknown] GO:0005554 [molecular_function unknown]                                         | Inserted fragment within model |
| 63000 | 64000 | E=3.2e-92 | At3g15310.1 | K7L4.11, expressed protein, GO:0000004 [biological_process unknown] GO:0008372 [cellular_component unknown] GO:0005554 [molecular_function unknown]                                         | Inserted fragment within model |
| 63500 | 64500 | E=1.3e-31 | At5g34838.1 | F11P10.11, hypothetical protein, GO:0000004 [biological_process unknown] GO:0008372 [cellular_component unknown] GO:0005554 [molecular_function unknown]                                    | Inserted fragment within model |
| 65500 | 66500 | E=4.0e-14 | At5g47540.1 | MNJ7.13, Mo25 family protein, GO:0005554 [molecular_function unknown]                                                                                                                       | Conserved collinear gene       |
| 66000 | 67000 | E=7.9e-46 | At5g47540.1 | MNJ7.13, Mo25 family protein, GO:0005554 [molecular_function unknown]                                                                                                                       | Conserved collinear gene       |
| 66500 | 67500 | E=6.7e-52 | At5g47540.1 | MNJ7.13, Mo25 family protein, GO:0005554 [molecular_function unknown]                                                                                                                       | Conserved collinear gene       |
| 67000 | 68000 | E=1.2e-37 | At5g47540.1 | MNJ7.13, Mo25 family protein, GO:0005554 [molecular_function unknown]                                                                                                                       | Conserved collinear gene       |
| 67500 | 68500 | E=4.9e-29 | At5g47540.1 | MNJ7.13, Mo25 family protein, GO:0005554 [molecular_function unknown]                                                                                                                       | Conserved collinear gene       |
| 68000 | 69000 | E=4.0e-34 | At5g47530.1 | MNJ7.12, auxin-responsive protein, putative, GO:0016020 [membrane] GO:0007275 [development] GO:0005554 [molecular_function unknown]                                                         | Conserved collinear gene       |
| 68500 | 69500 | E=2.2e-86 | At5g47530.1 | MNJ7.12, auxin-responsive protein, putative, GO:0016020 [membrane] GO:0007275 [development] GO:0005554 [molecular_function unknown]                                                         | Conserved collinear gene       |
| 69000 | 70000 | E=2.8e-95 | At5g47530.1 | MNJ7.12, auxin-responsive protein, putative, GO:0016020 [membrane] GO:0007275 [development] GO:0005554 [molecular_function unknown]                                                         | Conserved collinear gene       |
| 69500 | 70500 | E=3.6e-97 | At5g47530.1 | MNJ7.12, auxin-responsive protein, putative, GO:0016020 [membrane] GO:0007275 [development] GO:0005554 [molecular_function unknown]                                                         | Conserved collinear gene       |
| 70000 | 71000 | E=2.3e-39 | At5g47530.1 | MNJ7.12, auxin-responsive protein, putative, GO:0016020 [membrane] GO:0007275 [development] GO:0005554 [molecular_function unknown]                                                         | Conserved collinear gene       |
| 75000 | 76000 | E=1.3e-51 | At5g47520.1 | MNJ7.11, Ras-related GTP-binding protein, putative, GO:0005525 [GTP binding]                                                                                                                | Conserved collinear gene       |
| 75500 | 76500 | E=2.2e-60 | At5g47520.1 | MNJ7.11, Ras-related GTP-binding protein, putative, GO:0005525 [GTP binding]                                                                                                                | Conserved collinear gene       |
| 76000 | 77000 | E=1.8e-58 | At5g47520.1 | MNJ7.11, Ras-related GTP-binding protein, putative, GO:0005525 [GTP binding]                                                                                                                | Conserved collinear gene       |
| 77000 | 78000 | E=4.1e-11 | At5g47510.1 | MNJ7.10, SEC14 cytosolic factor family protein / phosphoglyceride transfer family protein, GO:0006810 [transport] GO:0008372 [cellular_component unknown] GO:0005215 [transporter activity] | Conserved collinear gene       |

|       |       |            |             |                                                                                                                                                                                             |                                                            |
|-------|-------|------------|-------------|---------------------------------------------------------------------------------------------------------------------------------------------------------------------------------------------|------------------------------------------------------------|
| 77500 | 78500 | E=2.8e-12  | At5g47510.1 | MNJ7.10, SEC14 cytosolic factor family protein / phosphoglyceride transfer family protein, GO:0006810 [transport] GO:0008372 [cellular_component unknown] GO:0005215 [transporter activity] | Conserved collinear gene<br>Inserted fragment within model |
| 80000 | 81000 | E=7.4e-07  | At1g65440.1 | T8F5.22, glycine-rich protein, GO:0006333 [chromatin assembly/disassembly] GO:0006352 [transcription initiation]                                                                            | Inserted fragment within model                             |
| 80500 | 81500 | E=7.4e-07  | At1g65440.1 | T8F5.22, glycine-rich protein, GO:0006333 [chromatin assembly/disassembly] GO:0006352 [transcription initiation]                                                                            | Inserted fragment within model                             |
| 88000 | 89000 | E=1.0e-42  | At5g47500.1 | MNJ7.9, pectinesterase family protein, GO:0030599 [pectinesterase activity] GO:0009505 [cell wall (sensu Magnoliophyta)]                                                                    | Conserved collinear gene                                   |
| 88500 | 89500 | E=2.3e-103 | At5g47500.1 | MNJ7.9, pectinesterase family protein, GO:0030599 [pectinesterase activity] GO:0009505 [cell wall (sensu Magnoliophyta)]                                                                    | Conserved collinear gene                                   |
| 89000 | 90000 | E=1.4e-78  | At5g47500.1 | MNJ7.9, pectinesterase family protein, GO:0030599 [pectinesterase activity] GO:0009505 [cell wall (sensu Magnoliophyta)]                                                                    | Conserved collinear gene                                   |
| 89500 | 90500 | E=2.3e-68  | At5g47500.1 | MNJ7.9, pectinesterase family protein, GO:0030599 [pectinesterase activity] GO:0009505 [cell wall (sensu Magnoliophyta)]                                                                    | Conserved collinear gene                                   |
| 90000 | 91000 | E=6.9e-15  | At5g47500.1 | MNJ7.9, pectinesterase family protein, GO:0030599 [pectinesterase activity] GO:0009505 [cell wall (sensu Magnoliophyta)]                                                                    | Conserved collinear gene                                   |
| 91000 | 92000 | E=1.4e-40  | At5g47470.1 | MNJ7.6, nodulin MtN21 family protein, GO:0016020 [membrane] GO:0005554 [molecular_function unknown]                                                                                         | Conserved collinear gene                                   |
| 91500 | 92500 | E=6.3e-79  | At5g47470.1 | MNJ7.6, nodulin MtN21 family protein, GO:0016020 [membrane] GO:0005554 [molecular_function unknown]                                                                                         | Conserved collinear gene                                   |
| 92000 | 93000 | E=1.9e-77  | At5g47470.1 | MNJ7.6, nodulin MtN21 family protein, GO:0016020 [membrane] GO:0005554 [molecular_function unknown]                                                                                         | Conserved collinear gene                                   |
| 92500 | 93500 | E=1.7e-42  | At5g47470.1 | MNJ7.6, nodulin MtN21 family protein, GO:0016020 [membrane] GO:0005554 [molecular_function unknown]                                                                                         | Conserved collinear gene                                   |
| 93000 | 94000 | E=6.7e-80  | At5g47460.1 | MNJ7.5, pentatricopeptide (PPR) repeat-containing protein, GO:0000004 [biological_process unknown] GO:0008372 [cellular_component unknown] GO:0005554 [molecular_function unknown]          | Conserved collinear gene                                   |
| 93500 | 94500 | E=4.9e-159 | At5g47460.1 | MNJ7.5, pentatricopeptide (PPR) repeat-containing protein, GO:0000004 [biological_process unknown] GO:0008372 [cellular_component unknown] GO:0005554 [molecular_function unknown]          | Conserved collinear gene                                   |
| 94000 | 95000 | E=3.8e-170 | At5g47460.1 | MNJ7.5, pentatricopeptide (PPR) repeat-containing protein, GO:0000004 [biological_process unknown] GO:0008372 [cellular_component unknown] GO:0005554 [molecular_function unknown]          | Conserved collinear gene                                   |
| 94500 | 95500 | E=5.1e-104 | At5g47460.1 | MNJ7.5, pentatricopeptide (PPR) repeat-containing protein, GO:0000004 [biological_process unknown] GO:0008372                                                                               | Conserved collinear gene                                   |

|        |        |           |             |                                                                                                                                                                       |                                       |
|--------|--------|-----------|-------------|-----------------------------------------------------------------------------------------------------------------------------------------------------------------------|---------------------------------------|
|        |        |           |             | [cellular_component unknown] GO:0005554 [molecular_function unknown]                                                                                                  |                                       |
|        |        |           |             | MNJ7.5, pentatricopeptide (PPR) repeat-containing protein, GO:0000004 [biological_process unknown] GO:0008372                                                         |                                       |
| 95000  | 96000  | E=3.6e-14 | At5g47460.1 | [cellular_component unknown] GO:0005554 [molecular_function unknown]                                                                                                  | Conserved collinear gene              |
| 95500  | 96500  | E=1.7e-21 | At5g47455.5 | MNJ7.31, expressed protein, GO:0005554 [molecular_function unknown]                                                                                                   | Conserved collinear gene              |
| 96000  | 97000  | E=1.5e-42 | At5g47455.5 | MNJ7.31, expressed protein, GO:0005554 [molecular_function unknown]                                                                                                   | Conserved collinear gene              |
| 96500  | 97500  | E=1.2e-17 | At5g47455.4 | MNJ7.31, expressed protein, GO:0005554 [molecular_function unknown]                                                                                                   | Conserved collinear gene              |
| 99500  | 100500 | E=6.4e-27 | At5g47450.1 | MQL5.31, major intrinsic family protein / MIP family protein, GO:0016020 [membrane] GO:0006810 [transport] GO:0015250 [water channel activity]                        | Conserved collinear gene              |
| 100000 | 101000 | E=3.3e-61 | At5g47450.1 | MQL5.31, major intrinsic family protein / MIP family protein, GO:0016020 [membrane] GO:0006810 [transport] GO:0015250 [water channel activity]                        | Conserved collinear gene              |
| 100500 | 101500 | E=3.7e-61 | At4g17340.1 | FCAALL.412, major intrinsic family protein / MIP family protein, GO:0016020 [membrane] GO:0006810 [transport] GO:0015250 [water channel activity]                     | Conserved collinear gene              |
| 101000 | 102000 | E=1.8e-61 | At5g47450.1 | MQL5.31, major intrinsic family protein / MIP family protein, GO:0016020 [membrane] GO:0006810 [transport] GO:0015250 [water channel activity]                        | Conserved collinear gene              |
| 101500 | 102500 | E=1.2e-20 | At5g47450.1 | MQL5.31, major intrinsic family protein / MIP family protein, GO:0016020 [membrane] GO:0006810 [transport] GO:0015250 [water channel activity]                        | Conserved collinear gene              |
| 103000 | 104000 | E=5.5e-08 | At1g77930.2 | F28K19.14, DNAJ heat shock N-terminal domain-containing protein, GO:0006457 [protein folding] GO:0003754 [chaperone activity] GO:0008372 [cellular_component unknown] | Inserted fragment outside gene models |
| 103500 | 104500 | E=5.5e-08 | At1g77930.2 | F28K19.14, DNAJ heat shock N-terminal domain-containing protein, GO:0006457 [protein folding] GO:0003754 [chaperone activity] GO:0008372 [cellular_component unknown] | Inserted fragment outside gene models |
| 118000 | 119000 | E=1.7e-13 | At2g11830.1 | F7E22.2, hypothetical protein, GO:0005554 [molecular_function unknown]                                                                                                | Predicted transposon                  |
| 118500 | 119500 | E=1.7e-13 | At2g11830.1 | F7E22.2, hypothetical protein, GO:0005554 [molecular_function unknown]                                                                                                | Predicted transposon                  |
| 119500 | 120500 | E=1.2e-60 | At4g34880.1 | F11111.120, amidase family protein, GO:0004040 [amidase activity]                                                                                                     | Largely intact relocated              |

|        |        |           |             |                                                                                                                                                                                                                                |                                                |
|--------|--------|-----------|-------------|--------------------------------------------------------------------------------------------------------------------------------------------------------------------------------------------------------------------------------|------------------------------------------------|
| 120000 | 121000 | E=7.8e-77 | At4g34880.1 | F11111.120, amidase family protein, GO:0004040 [amidase activity]                                                                                                                                                              | gene<br>Largely intact<br>relocated            |
| 120500 | 121500 | E=3.1e-52 | At4g34880.1 | F11111.120, amidase family protein, GO:0004040 [amidase activity]                                                                                                                                                              | gene<br>Largely intact<br>relocated            |
| 121000 | 122000 | E=8.1e-90 | At4g34880.1 | F11111.120, amidase family protein, GO:0004040 [amidase activity]                                                                                                                                                              | gene<br>Largely intact<br>relocated            |
| 121500 | 122500 | E=8.8e-74 | At4g34880.1 | F11111.120, amidase family protein, GO:0004040 [amidase activity]<br>MQL5.28, expressed protein, GO:0000004 [biological_process<br>unknown] GO:0008372 [cellular_component unknown] GO:0005554<br>[molecular_function unknown] | gene<br>Largely intact<br>relocated            |
| 122000 | 123000 | E=1.4e-53 | At5g47420.1 | MQL5.28, expressed protein, GO:0000004 [biological_process<br>unknown] GO:0008372 [cellular_component unknown] GO:0005554<br>[molecular_function unknown]                                                                      | Conserved<br>collinear gene                    |
| 122500 | 123500 | E=1.3e-58 | At5g47420.1 | MQL5.28, expressed protein, GO:0000004 [biological_process<br>unknown] GO:0008372 [cellular_component unknown] GO:0005554<br>[molecular_function unknown]                                                                      | Conserved<br>collinear gene                    |
| 123000 | 124000 | E=7.4e-42 | At5g47420.1 | MQL5.28, expressed protein, GO:0000004 [biological_process<br>unknown] GO:0008372 [cellular_component unknown] GO:0005554<br>[molecular_function unknown]                                                                      | Conserved<br>collinear gene                    |
| 123500 | 124500 | E=6.4e-36 | At5g47420.1 | MQL5.28, expressed protein, GO:0000004 [biological_process<br>unknown] GO:0008372 [cellular_component unknown] GO:0005554<br>[molecular_function unknown]                                                                      | Conserved<br>collinear gene                    |
| 124000 | 125000 | E=1.9e-07 | At5g47410.1 | MQL5.27, hypothetical protein, GO:0005554 [molecular_function<br>unknown]                                                                                                                                                      | Conserved<br>collinear gene                    |
| 124500 | 125500 | E=7.9e-51 | At5g47390.1 | MQL5.25, myb family transcription factor, GO:0003677 [DNA binding]<br>GO:0003700 [transcription factor activity]                                                                                                               | Conserved<br>collinear gene                    |
| 125000 | 126000 | E=3.3e-68 | At5g47390.1 | MQL5.25, myb family transcription factor, GO:0003677 [DNA binding]<br>GO:0003700 [transcription factor activity]                                                                                                               | Conserved<br>collinear gene                    |
| 125500 | 126500 | E=1.8e-99 | At5g47390.1 | MQL5.25, myb family transcription factor, GO:0003677 [DNA binding]<br>GO:0003700 [transcription factor activity]                                                                                                               | Conserved<br>collinear gene                    |
| 126000 | 127000 | E=1.5e-50 | At5g47390.1 | MQL5.25, myb family transcription factor, GO:0003677 [DNA binding]<br>GO:0003700 [transcription factor activity]                                                                                                               | Conserved<br>collinear gene                    |
| 130000 | 131000 | E=4.7e-07 | At2g31700.1 | T9H9.22, hypothetical protein, GO:0005554 [molecular_function<br>unknown]                                                                                                                                                      | Inserted<br>fragment<br>outside gene<br>models |
| 130500 | 131500 | E=4.7e-07 | At2g31700.1 | T9H9.22, hypothetical protein, GO:0005554 [molecular_function<br>unknown]                                                                                                                                                      | Inserted<br>fragment                           |



|        |        |           |             |                                                                                                                                                                                                                                                                                |                                                       |
|--------|--------|-----------|-------------|--------------------------------------------------------------------------------------------------------------------------------------------------------------------------------------------------------------------------------------------------------------------------------|-------------------------------------------------------|
| 132000 | 133000 | E=3.6e-07 | At5g47160.1 | K14A3.1, YDG/SRA domain-containing protein, GO:0000004 [biological_process unknown] GO:0008372 [cellular_component unknown] GO:0005554 [molecular_function unknown]                                                                                                            | outside gene models<br>Inserted fragment within model |
| 134500 | 135500 | E=4.2e-08 | At5g47380.1 | MQL5.24, expressed protein, GO:0000004 [biological_process unknown] GO:0008372 [cellular_component unknown] GO:0005554 [molecular_function unknown]                                                                                                                            | Additional collinear gene fragment                    |
| 135000 | 136000 | E=4.2e-08 | At5g47380.1 | MQL5.24, expressed protein, GO:0000004 [biological_process unknown] GO:0008372 [cellular_component unknown] GO:0005554 [molecular_function unknown]                                                                                                                            | Additional collinear gene fragment                    |
| 137000 | 138000 | E=1.6e-11 | At1g33710.1 | F14M2.21, expressed protein, GO:0005554 [molecular_function unknown]                                                                                                                                                                                                           | Inserted fragment within model                        |
| 142500 | 143500 | E=1.6e-40 | At5g32482.1 | T15F17.6, zinc knuckle (CCHC-type) family protein, GO:0003676 [nucleic acid binding]                                                                                                                                                                                           | Predicted transposon                                  |
| 143000 | 144000 | E=2.0e-33 | At5g33303.1 | F19N2.6, hypothetical protein, GO:0005554 [molecular_function unknown]                                                                                                                                                                                                         | Predicted transposon                                  |
| 145500 | 146500 | E=1.3e-20 | At5g47370.1 | MQL5.23, homeobox-leucine zipper protein 2 (HAT2) / HD-ZIP protein 2, GO:0009826 [cell elongation] GO:0009733 [response to auxin stimulus] GO:0005634 [nucleus] GO:0003677 [DNA binding] GO:0006355 [regulation of transcription, DNA-dependent] GO:0009734 [auxin mediated si | Additional collinear gene fragment                    |
| 146000 | 147000 | E=1.3e-20 | At5g47370.1 | MQL5.23, homeobox-leucine zipper protein 2 (HAT2) / HD-ZIP protein 2, GO:0009826 [cell elongation] GO:0009733 [response to auxin stimulus] GO:0005634 [nucleus] GO:0003677 [DNA binding] GO:0006355 [regulation of transcription, DNA-dependent] GO:0009734 [auxin mediated si | Additional collinear gene fragment                    |
| 148500 | 149500 | E=4.5e-21 | At1g70910.1 | F15H11.25, zinc finger (C3HC4-type RING finger) family protein, GO:0005515 [protein binding] GO:0008270 [zinc ion binding]                                                                                                                                                     | Inserted fragment within model                        |
| 149000 | 150000 | E=2.6e-12 | At1g57730.1 | T8L23.19, zinc finger (C3HC4-type RING finger) family protein, GO:0005515 [protein binding] GO:0008270 [zinc ion binding]                                                                                                                                                      | Inserted fragment within model                        |
| 149500 | 150500 | E=1.1e-08 | At5g47150.1 | K14A3.10, YDG/SRA domain-containing protein, GO:0000004 [biological_process unknown] GO:0008372 [cellular_component unknown] GO:0005554 [molecular_function unknown]                                                                                                           | Inserted fragment outside gene models                 |
| 151000 | 152000 | E=7.3e-15 | At5g53620.2 | MNC6.16, expressed protein, GO:0005554 [molecular_function unknown]                                                                                                                                                                                                            | Inserted fragment within model                        |

|        |        |           |             |                                                                                                                                                                                                                                                                                           |                                       |
|--------|--------|-----------|-------------|-------------------------------------------------------------------------------------------------------------------------------------------------------------------------------------------------------------------------------------------------------------------------------------------|---------------------------------------|
| 151500 | 152500 | E=9.3e-14 | At5g53620.2 | MNC6.16, expressed protein, GO:0005554 [molecular_function unknown]                                                                                                                                                                                                                       | Inserted fragment within model        |
| 153500 | 154500 | E=1.7e-11 | At5g47150.1 | K14A3.10, YDG/SRA domain-containing protein, GO:0000004 [biological_process unknown] GO:0008372 [cellular_component unknown] GO:0005554 [molecular_function unknown]                                                                                                                      | Inserted fragment within model        |
| 166000 | 167000 | E=5.4e-12 | At2g05950.1 | T6P5.15, hypothetical protein, GO:0005554 [molecular_function unknown]                                                                                                                                                                                                                    | Predicted transposon                  |
| 166500 | 167500 | E=1.3e-11 | At2g05950.1 | T6P5.15, hypothetical protein, GO:0005554 [molecular_function unknown]                                                                                                                                                                                                                    | Predicted transposon                  |
| 169000 | 170000 | E=4.8e-37 | At4g23160.1 | F21P8.50, protein kinase family protein, GO:0016301 [kinase activity]                                                                                                                                                                                                                     | Predicted transposon                  |
| 169500 | 170500 | E=1.5e-62 | At4g23160.1 | F21P8.50, protein kinase family protein, GO:0016301 [kinase activity]                                                                                                                                                                                                                     | Predicted transposon                  |
| 170000 | 171000 | E=1.9e-55 | At4g23160.1 | F21P8.50, protein kinase family protein, GO:0016301 [kinase activity]                                                                                                                                                                                                                     | Predicted transposon                  |
| 170500 | 171500 | E=1.6e-21 | At4g23160.1 | F21P8.50, protein kinase family protein, GO:0016301 [kinase activity]                                                                                                                                                                                                                     | Predicted transposon                  |
| 198000 | 199000 | E=9.7e-06 | At1g36550.1 | F28J9.18, hypothetical protein, GO:0005554 [molecular_function unknown]                                                                                                                                                                                                                   | Inserted fragment outside gene models |
| 198500 | 199500 | E=1.5e-06 | At1g36550.1 | F28J9.18, hypothetical protein, GO:0005554 [molecular_function unknown]                                                                                                                                                                                                                   | Predicted transposon                  |
| 201500 | 202500 | E=6.6e-28 | At5g47220.1 | MQL5.7, ethylene-responsive element-binding factor 2 (ERF2), GO:0003677 [DNA binding] GO:0045941 [positive regulation of transcription] GO:0006355 [regulation of transcription, DNA-dependent] GO:0016563 [transcriptional activator activity] GO:0008372 [cellular_                     | annotation error                      |
| 202000 | 203000 | E=7.0e-50 | At4g17500.1 | FCAALL.123, ethylene-responsive element-binding protein 1 (ERF1) / EREBP-2 protein, GO:0005643 [nuclear pore] GO:0003677 [DNA binding] GO:0006355 [regulation of transcription, DNA-dependent] GO:0016563 [transcriptional activator activity] GO:0003700 [transcription factor activity] | Conserved collinear gene              |
| 202500 | 203500 | E=3.6e-40 | At4g17500.1 | FCAALL.123, ethylene-responsive element-binding protein 1 (ERF1) / EREBP-2 protein, GO:0005643 [nuclear pore] GO:0003677 [DNA binding] GO:0006355 [regulation of transcription, DNA-dependent] GO:0016563 [transcriptional activator activity] GO:0003700 [transcription factor activity] | Conserved collinear gene              |
| 204500 | 205500 | E=3.7e-08 | At5g47210.1 | MQL5.6, nuclear RNA-binding protein, putative, GO:0003723 [RNA binding]                                                                                                                                                                                                                   | Conserved collinear gene              |
| 205000 | 206000 | E=7.0e-   | At5g47210.1 | MQL5.6, nuclear RNA-binding protein, putative, GO:0003723 [RNA                                                                                                                                                                                                                            | Conserved                             |

|        |        |           |             |                                                                                                                                                                                        |            |                         |
|--------|--------|-----------|-------------|----------------------------------------------------------------------------------------------------------------------------------------------------------------------------------------|------------|-------------------------|
|        |        | 13        |             | binding]                                                                                                                                                                               |            | collinear gene          |
| 205500 | 206500 | E=4.8e-11 | At5g47210.1 | MQL5.6, nuclear RNA-binding protein, putative, GO:0003723 [RNA binding]                                                                                                                | Conserved  | collinear gene          |
| 206000 | 207000 | E=2.2e-64 | At5g47210.1 | MQL5.6, nuclear RNA-binding protein, putative, GO:0003723 [RNA binding]                                                                                                                | Conserved  | collinear gene          |
| 206500 | 207500 | E=1.0e-66 | At5g47210.1 | MQL5.6, nuclear RNA-binding protein, putative, GO:0003723 [RNA binding]                                                                                                                | Conserved  | collinear gene          |
| 207000 | 208000 | E=1.2e-18 | At5g47210.1 | MQL5.6, nuclear RNA-binding protein, putative, GO:0003723 [RNA binding]                                                                                                                | Conserved  | collinear gene          |
| 207500 | 208500 | E=1.6e-39 | At5g47200.1 | MQL5.5, Ras-related GTP-binding protein, putative, GO:0005525 [GTP binding]                                                                                                            | Conserved  | collinear gene          |
| 208000 | 209000 | E=1.2e-58 | At5g47200.1 | MQL5.5, Ras-related GTP-binding protein, putative, GO:0005525 [GTP binding]                                                                                                            | Conserved  | collinear gene          |
| 208500 | 209500 | E=8.5e-13 | At5g47200.1 | MQL5.5, Ras-related GTP-binding protein, putative, GO:0005525 [GTP binding]                                                                                                            | Conserved  | collinear gene          |
| 216000 | 217000 | E=2.2e-09 | At5g47190.1 | MQL5.4, ribosomal protein L19 family protein, GO:0005840 [ribosome] GO:0007046 [ribosome biogenesis] GO:0006412 [protein biosynthesis] GO:0003735 [structural constituent of ribosome] | Additional | collinear gene fragment |
| 216500 | 217500 | E=6.1e-18 | At5g47190.1 | MQL5.4, ribosomal protein L19 family protein, GO:0005840 [ribosome] GO:0007046 [ribosome biogenesis] GO:0006412 [protein biosynthesis] GO:0003735 [structural constituent of ribosome] | Additional | collinear gene fragment |
| 217000 | 218000 | E=1.2e-17 | At5g47190.1 | MQL5.4, ribosomal protein L19 family protein, GO:0005840 [ribosome] GO:0007046 [ribosome biogenesis] GO:0006412 [protein biosynthesis] GO:0003735 [structural constituent of ribosome] | Additional | collinear gene fragment |
| 217500 | 218500 | E=3.1e-13 | At5g47190.1 | MQL5.4, ribosomal protein L19 family protein, GO:0005840 [ribosome] GO:0007046 [ribosome biogenesis] GO:0006412 [protein biosynthesis] GO:0003735 [structural constituent of ribosome] | Additional | collinear gene fragment |
| 218500 | 219500 | E=1.7e-24 | At5g47180.2 | MQL5.3, vesicle-associated membrane family protein / VAMP family protein, GO:0005198 [structural molecule activity]                                                                    | Conserved  | collinear gene          |
| 219000 | 220000 | E=7.5e-56 | At5g47180.2 | MQL5.3, vesicle-associated membrane family protein / VAMP family protein, GO:0005198 [structural molecule activity]                                                                    | Conserved  | collinear gene          |
| 219500 | 220500 | E=3.0e-56 | At5g47180.2 | MQL5.3, vesicle-associated membrane family protein / VAMP family protein, GO:0005198 [structural molecule activity]                                                                    | Conserved  | collinear gene          |
| 220000 | 221000 | E=6.0e-30 | At5g47180.2 | MQL5.3, vesicle-associated membrane family protein / VAMP family protein, GO:0005198 [structural molecule activity]                                                                    | Conserved  | collinear gene          |
| 220500 | 221500 | E=6.5e-17 | At5g47180.2 | MQL5.3, vesicle-associated membrane family protein / VAMP family protein, GO:0005198 [structural molecule activity]                                                                    | Conserved  | collinear gene          |
| 222000 | 223000 | E=3.8e-32 | At5g47150.1 | K14A3.10, YDG/SRA domain-containing protein, GO:0000004 [biological_process unknown] GO:0008372 [cellular_component unknown] GO:0005554 [molecular_function unknown]                   | Conserved  | collinear gene          |
| 222500 | 223500 | E=7.4e-   | At5g47150.1 | K14A3.10, YDG/SRA domain-containing protein, GO:0000004                                                                                                                                | Conserved  |                         |

|        |        |           |             |                                                                                                                                                                                                                                                            |                          |
|--------|--------|-----------|-------------|------------------------------------------------------------------------------------------------------------------------------------------------------------------------------------------------------------------------------------------------------------|--------------------------|
|        |        | 84        |             | [biological_process unknown] GO:0008372 [cellular_component unknown] GO:0005554 [molecular_function unknown] K14A3.10, YDG/SRA domain-containing protein, GO:0000004                                                                                       | collinear gene           |
| 223000 | 224000 | E=2.8e-47 | At5g47150.1 | [biological_process unknown] GO:0008372 [cellular_component unknown] GO:0005554 [molecular_function unknown] K14A3.10, YDG/SRA domain-containing protein, GO:0000004                                                                                       | Conserved collinear gene |
| 228000 | 229000 | E=3.2e-16 | At5g47150.1 | [biological_process unknown] GO:0008372 [cellular_component unknown] GO:0005554 [molecular_function unknown] K14A3.10, YDG/SRA domain-containing protein, GO:0000004                                                                                       | annotation error         |
| 228500 | 229500 | E=7.6e-86 | At5g47150.1 | [biological_process unknown] GO:0008372 [cellular_component unknown] GO:0005554 [molecular_function unknown] K14A3.10, YDG/SRA domain-containing protein, GO:0000004                                                                                       | annotation error         |
| 229000 | 230000 | E=1.1e-78 | At5g47150.1 | [biological_process unknown] GO:0008372 [cellular_component unknown] GO:0005554 [molecular_function unknown] K14A3.10, YDG/SRA domain-containing protein, GO:0000004                                                                                       | annotation error         |
| 229500 | 230500 | E=4.6e-06 | At5g47150.1 | [biological_process unknown] GO:0008372 [cellular_component unknown] GO:0005554 [molecular_function unknown] K14A3.9, zinc finger (GATA type) family protein, GO:0003700                                                                                   | annotation error         |
| 232500 | 233500 | E=3.1e-45 | At5g47140.1 | [transcription factor activity] K14A3.9, zinc finger (GATA type) family protein, GO:0003700                                                                                                                                                                | Conserved collinear gene |
| 233000 | 234000 | E=7.0e-53 | At5g47140.1 | [transcription factor activity] K14A3.9, zinc finger (GATA type) family protein, GO:0003700                                                                                                                                                                | Conserved collinear gene |
| 233500 | 234500 | E=3.1e-67 | At5g47140.1 | [transcription factor activity] K14A3.9, zinc finger (GATA type) family protein, GO:0003700                                                                                                                                                                | Conserved collinear gene |
| 234000 | 235000 | E=7.0e-85 | At5g47140.1 | [transcription factor activity] K14A3.9, zinc finger (GATA type) family protein, GO:0003700                                                                                                                                                                | Conserved collinear gene |
| 234500 | 235500 | E=8.3e-33 | At5g47140.1 | [transcription factor activity] K14A3.9, zinc finger (GATA type) family protein, GO:0003700                                                                                                                                                                | Conserved collinear gene |
| 243500 | 244500 | E=3.8e-14 | At2g05950.1 | T6P5.15, hypothetical protein, GO:0005554 [molecular_function unknown] K14A3.7, Bax inhibitor-1 putative / BI-1 putative, GO:0005783                                                                                                                       | Predicted transposon     |
| 249500 | 250500 | E=2.5e-62 | At5g47120.1 | [endoplasmic reticulum] GO:0006916 [anti-apoptosis] GO:0005635 [nuclear membrane] GO:0006915 [apoptosis] GO:0016329 [apoptosis regulator activity] GO:0008189 [apoptosis inhibitor activity] K14A3.7, Bax inhibitor-1 putative / BI-1 putative, GO:0005783 | Conserved collinear gene |
| 250000 | 251000 | E=6.4e-52 | At5g47120.1 | [endoplasmic reticulum] GO:0006916 [anti-apoptosis] GO:0005635 [nuclear membrane] GO:0006915 [apoptosis] GO:0016329 [apoptosis regulator activity] GO:0008189 [apoptosis inhibitor activity] K14A3.7, Bax inhibitor-1 putative / BI-1 putative, GO:0005783 | Conserved collinear gene |
| 250500 | 251500 | E=1.2e-39 | At5g47120.1 | [endoplasmic reticulum] GO:0006916 [anti-apoptosis] GO:0005635 [nuclear membrane] GO:0006915 [apoptosis] GO:0016329 [apoptosis regulator activity] GO:0008189 [apoptosis inhibitor activity]                                                               | Conserved collinear gene |

|        |        |           |             |                                                                                                                                                                                                                                                            |                                |
|--------|--------|-----------|-------------|------------------------------------------------------------------------------------------------------------------------------------------------------------------------------------------------------------------------------------------------------------|--------------------------------|
| 251000 | 252000 | E=9.2e-17 | At5g47120.1 | K14A3.7, Bax inhibitor-1 putative / BI-1 putative, GO:0005783 [endoplasmic reticulum] GO:0006916 [anti-apoptosis] GO:0005635 [nuclear membrane] GO:0006915 [apoptosis] GO:0016329 [apoptosis regulator activity] GO:0008189 [apoptosis inhibitor activity] | Conserved collinear gene       |
| 263000 | 264000 | E=1.1e-29 | At1g11420.1 | T23J18.9, agenet domain-containing protein, GO:0005554 [molecular_function unknown]                                                                                                                                                                        | Inserted fragment within model |
| 263500 | 264500 | E=5.5e-12 | At1g26540.1 | T1K7.9, agenet domain-containing protein, GO:0005554 [molecular_function unknown]                                                                                                                                                                          | Inserted fragment within model |
| 265500 | 266500 | E=2.5e-09 | At3g32900.1 | T7B9.14, Ulp1 protease family protein, GO:0008234 [cysteine-type peptidase activity] GO:0006508 [proteolysis and peptidolysis]                                                                                                                             | Inserted fragment within model |
| 266000 | 267000 | E=2.5e-09 | At3g32900.1 | T7B9.14, Ulp1 protease family protein, GO:0008234 [cysteine-type peptidase activity] GO:0006508 [proteolysis and peptidolysis]                                                                                                                             | Inserted fragment within model |
| 266500 | 267500 | E=5.3e-07 | At1g74250.1 | F1O17.8, DNAJ heat shock N-terminal domain-containing protein, GO:0006457 [protein folding] GO:0003754 [chaperone activity] GO:0008372 [cellular_component unknown]                                                                                        | Inserted fragment within model |
| 267000 | 268000 | E=3.4e-06 | At1g56660.1 | F25P12.91, expressed protein, GO:0005554 [molecular_function unknown]                                                                                                                                                                                      | Inserted fragment within model |
| 270000 | 271000 | E=7.9e-37 | At5g47110.1 | K14A3.6, lili3 protein, putative, GO:0009765 [photosynthesis light harvesting] GO:0005554 [molecular_function unknown]                                                                                                                                     | Conserved collinear gene       |
| 270500 | 271500 | E=3.4e-78 | At5g47110.1 | K14A3.6, lili3 protein, putative, GO:0009765 [photosynthesis light harvesting] GO:0005554 [molecular_function unknown]                                                                                                                                     | Conserved collinear gene       |
| 271000 | 272000 | E=4.1e-42 | At5g47110.1 | K14A3.6, lili3 protein, putative, GO:0009765 [photosynthesis light harvesting] GO:0005554 [molecular_function unknown]                                                                                                                                     | Conserved collinear gene       |
| 271500 | 272500 | E=2.6e-64 | At3g01910.1 | F28J7.38, sulfite oxidase, putative, GO:0006790 [sulfur metabolism] GO:0008482 [sulfite oxidase activity]                                                                                                                                                  | Largely intact relocated gene  |
| 272000 | 273000 | E=1.4e-86 | At3g01910.1 | F28J7.38, sulfite oxidase, putative, GO:0006790 [sulfur metabolism] GO:0008482 [sulfite oxidase activity]                                                                                                                                                  | Largely intact relocated gene  |
| 272500 | 273500 | E=1.6e-61 | At3g01910.1 | F28J7.38, sulfite oxidase, putative, GO:0006790 [sulfur metabolism] GO:0008482 [sulfite oxidase activity]                                                                                                                                                  | Largely intact relocated gene  |
| 273000 | 274000 | E=6.2e-49 | At3g01910.1 | F28J7.38, sulfite oxidase, putative, GO:0006790 [sulfur metabolism] GO:0008482 [sulfite oxidase activity]                                                                                                                                                  | Largely intact relocated gene  |
| 273500 | 274500 | E=3.3e-   | At3g01910.1 | F28J7.38, sulfite oxidase, putative, GO:0006790 [sulfur metabolism]                                                                                                                                                                                        | Largely intact                 |

|        |        |           |             |                                                                                                                                                                                                |                                                     |
|--------|--------|-----------|-------------|------------------------------------------------------------------------------------------------------------------------------------------------------------------------------------------------|-----------------------------------------------------|
|        |        | 18        |             | GO:0008482 [sulfite oxidase activity]                                                                                                                                                          | relocated<br>gene                                   |
| 276000 | 277000 | E=2.8e-16 | At5g16180.1 | T21H19.100, hypothetical protein, GO:0000004 [biological_process unknown] GO:0008372 [cellular_component unknown] GO:0005554 [molecular_function unknown]                                      | Inserted<br>fragment<br>outside gene<br>models      |
| 276500 | 277500 | E=2.8e-16 | At5g16180.1 | T21H19.100, hypothetical protein, GO:0000004 [biological_process unknown] GO:0008372 [cellular_component unknown] GO:0005554 [molecular_function unknown]                                      | Inserted<br>fragment<br>outside gene<br>models      |
| 281500 | 282500 | E=6.2e-07 | At5g37120.1 | MJG14.15, hypothetical protein, GO:0005554 [molecular_function unknown]                                                                                                                        | Inserted<br>fragment<br>within model                |
| 287500 | 288500 | E=6.2e-09 | At5g47100.1 | K14A3.5, calcineurin B-like protein 9 (CBL9), GO:0006950 [response to stress] GO:0008287 [protein serine/threonine phosphatase complex] GO:0005509 [calcium ion binding]                       | Conserved<br>collinear gene                         |
| 288000 | 289000 | E=1.3e-44 | At4g17615.1 | FCAALL.122, calcineurin B-like protein 1 (CBL1), GO:0006970 [response to osmotic stress] GO:0019722 [calcium-mediated signaling] GO:0005509 [calcium ion binding] GO:0005886 [plasma membrane] | Conserved<br>collinear gene                         |
| 288500 | 289500 | E=8.3e-63 | At5g47100.1 | K14A3.5, calcineurin B-like protein 9 (CBL9), GO:0006950 [response to stress] GO:0008287 [protein serine/threonine phosphatase complex] GO:0005509 [calcium ion binding]                       | Conserved<br>collinear gene                         |
| 289000 | 290000 | E=1.9e-42 | At5g47100.1 | K14A3.5, calcineurin B-like protein 9 (CBL9), GO:0006950 [response to stress] GO:0008287 [protein serine/threonine phosphatase complex] GO:0005509 [calcium ion binding]                       | Conserved<br>collinear gene                         |
| 294000 | 295000 | E=1.4e-50 | At5g47080.1 | MQD22.23, casein kinase II beta chain, putative, GO:0005956 [protein kinase CK2 complex] GO:0008605 [protein kinase CK2 regulator activity]                                                    | Conserved<br>collinear gene                         |
| 294500 | 295500 | E=1.8e-74 | At4g17640.1 | FCAALL.14, casein kinase II beta chain, putative, GO:0005956 [protein kinase CK2 complex] GO:0008605 [protein kinase CK2 regulator activity]                                                   | Conserved<br>collinear gene                         |
| 295000 | 296000 | E=7.8e-39 | At5g47080.1 | MQD22.23, casein kinase II beta chain, putative, GO:0005956 [protein kinase CK2 complex] GO:0008605 [protein kinase CK2 regulator activity]                                                    | Conserved<br>collinear gene                         |
| 295500 | 296500 | E=2.0e-16 | At5g47080.2 | MQD22.23, casein kinase II beta chain, putative, GO:0005956 [protein kinase CK2 complex] GO:0008605 [protein kinase CK2 regulator activity]                                                    | Conserved<br>collinear gene<br>Inserted<br>fragment |
| 296000 | 297000 | E=3.0e-06 | At5g62750.1 | MQB2.7, expressed protein, GO:0005554 [molecular_function unknown]                                                                                                                             | outside gene<br>models                              |

|        |        |            |             |                                                                                                                                                                        |                                       |
|--------|--------|------------|-------------|------------------------------------------------------------------------------------------------------------------------------------------------------------------------|---------------------------------------|
| 296500 | 297500 | E=3.6e-07  | At3g28770.1 | T19N8.6, expressed protein, GO:0005554 [molecular_function unknown]                                                                                                    | Inserted fragment outside gene models |
| 297500 | 298500 | E=5.6e-30  | At1g54430.1 | F20D21.25, hypothetical protein, GO:0005554 [molecular_function unknown]                                                                                               | Inserted fragment within model        |
| 298000 | 299000 | E=3.1e-54  | At1g54430.1 | F20D21.25, hypothetical protein, GO:0005554 [molecular_function unknown]                                                                                               | Inserted fragment within model        |
| 298500 | 299500 | E=3.5e-17  | At1g54430.1 | F20D21.25, hypothetical protein, GO:0005554 [molecular_function unknown]                                                                                               | Inserted fragment within model        |
| 308500 | 309500 | E=2.2e-11  | At3g44713.1 | T18B22.3, hypothetical protein, GO:0005554 [molecular_function unknown]                                                                                                | Inserted fragment within model        |
| 309000 | 310000 | E=3.6e-10  | At3g44713.1 | T18B22.3, hypothetical protein, GO:0005554 [molecular_function unknown]                                                                                                | Inserted fragment within model        |
| 309500 | 310500 | E=3.7e-46  | At1g74310.1 | F1O17.2, heat shock protein 101 (HSP101), GO:0005524 [ATP binding] GO:0009408 [response to heat] GO:0016887 [ATPase activity] GO:0003773 [heat shock protein activity] | Inserted fragment within model        |
| 310000 | 311000 | E=3.7e-46  | At1g74310.1 | F1O17.2, heat shock protein 101 (HSP101), GO:0005524 [ATP binding] GO:0009408 [response to heat] GO:0016887 [ATPase activity] GO:0003773 [heat shock protein activity] | Inserted fragment within model        |
| 310500 | 311500 | E=2.2e-09  | At5g54440.1 | F24B18.6, expressed protein, GO:0005554 [molecular_function unknown]                                                                                                   | Inserted fragment within model        |
| 313500 | 314500 | E=1.7e-22  | At5g47090.1 | K14A3.4, expressed protein, GO:0005554 [molecular_function unknown]                                                                                                    | Conserved collinear gene              |
| 314000 | 315000 | E=4.1e-84  | At5g47090.1 | K14A3.4, expressed protein, GO:0005554 [molecular_function unknown]                                                                                                    | Conserved collinear gene              |
| 314500 | 315500 | E=1.7e-108 | At5g47090.1 | K14A3.4, expressed protein, GO:0005554 [molecular_function unknown]                                                                                                    | Conserved collinear gene              |
| 315000 | 316000 | E=3.2e-53  | At5g47090.1 | K14A3.4, expressed protein, GO:0005554 [molecular_function unknown]                                                                                                    | Conserved collinear gene              |
| 315500 | 316500 | E=1.6e-20  | At2g36310.1 | F2H17.8, inosine-uridine preferring nucleoside hydrolase family protein, GO:0016787 [hydrolase activity]                                                               | Inserted fragment outside gene models |
| 316000 | 317000 | E=3.4e-    | At2g36310.1 | F2H17.8, inosine-uridine preferring nucleoside hydrolase family protein,                                                                                               | Inserted                              |

|        |        |           |             |                                                                                                          |  |                                                            |
|--------|--------|-----------|-------------|----------------------------------------------------------------------------------------------------------|--|------------------------------------------------------------|
|        |        | 35        |             | GO:0016787 [hydrolase activity]                                                                          |  | fragment<br>outside gene<br>models<br>Inserted<br>fragment |
| 316500 | 317500 | E=2.1e-20 | At2g36310.1 | F2H17.8, inosine-uridine preferring nucleoside hydrolase family protein, GO:0016787 [hydrolase activity] |  | outside gene<br>models<br>annotation error                 |
| 326500 | 327500 | E=2.9e-15 | At5g47070.1 | MQD22.21, protein kinase, putative, GO:0016301 [kinase activity]                                         |  | annotation error                                           |
| 327000 | 328000 | E=2.9e-15 | At5g47070.1 | MQD22.21, protein kinase, putative, GO:0016301 [kinase activity]                                         |  | error                                                      |
| 333500 | 334500 | E=7.3e-27 | At5g47070.1 | MQD22.21, protein kinase, putative, GO:0016301 [kinase activity]                                         |  | Conserved<br>collinear gene                                |
| 334000 | 335000 | E=1.3e-87 | At5g47070.1 | MQD22.21, protein kinase, putative, GO:0016301 [kinase activity]                                         |  | Conserved<br>collinear gene                                |
| 334500 | 335500 | E=1.8e-40 | At5g47070.1 | MQD22.21, protein kinase, putative, GO:0016301 [kinase activity]                                         |  | Conserved<br>collinear gene                                |
| 335000 | 336000 | E=3.9e-89 | At5g47070.1 | MQD22.21, protein kinase, putative, GO:0016301 [kinase activity]                                         |  | Conserved<br>collinear gene                                |
| 335500 | 336500 | E=1.0e-64 | At5g47070.1 | MQD22.21, protein kinase, putative, GO:0016301 [kinase activity]                                         |  | Conserved<br>collinear gene                                |
| 336000 | 337000 | E=6.4e-25 | At4g17670.1 | FCAALL.414, senescence-associated protein-related, GO:0005554 [molecular_function unknown]               |  | Conserved<br>collinear gene                                |
| 336500 | 337500 | E=1.5e-54 | At4g17670.1 | FCAALL.414, senescence-associated protein-related, GO:0005554 [molecular_function unknown]               |  | Conserved<br>collinear gene                                |
| 337000 | 338000 | E=1.9e-28 | At5g47060.1 | MQD22.20, senescence-associated protein-related, GO:0005554 [molecular_function unknown]                 |  | Conserved<br>collinear gene                                |
| 342000 | 343000 | E=9.3e-24 | At5g32482.1 | T15F17.6, zinc knuckle (CCHC-type) family protein, GO:0003676 [nucleic acid binding]                     |  | Inserted<br>fragment<br>outside gene<br>models             |
| 342500 | 343500 | E=3.0e-24 | At5g32482.1 | T15F17.6, zinc knuckle (CCHC-type) family protein, GO:0003676 [nucleic acid binding]                     |  | Inserted<br>fragment<br>outside gene<br>models             |
| 343500 | 344500 | E=1.3e-30 | At5g32482.1 | T15F17.6, zinc knuckle (CCHC-type) family protein, GO:0003676 [nucleic acid binding]                     |  | Inserted<br>fragment<br>outside gene<br>models             |
| 344000 | 345000 | E=2.4e-30 | At5g32482.1 | T15F17.6, zinc knuckle (CCHC-type) family protein, GO:0003676 [nucleic acid binding]                     |  | Inserted<br>fragment                                       |



|        |        |           |             |                                                                                                                                |                                                       |
|--------|--------|-----------|-------------|--------------------------------------------------------------------------------------------------------------------------------|-------------------------------------------------------|
| 345500 | 346500 | E=8.1e-06 | At5g45570.1 | MFC19.3, Ulp1 protease family protein, GO:0008233 [peptidase activity]                                                         | outside gene models<br>Inserted fragment within model |
| 346000 | 347000 | E=8.1e-06 | At5g45570.1 | MFC19.3, Ulp1 protease family protein, GO:0008233 [peptidase activity]                                                         | Inserted fragment within model                        |
| 348500 | 349500 | E=8.9e-06 | At4g08880.1 | T3H13.8, Ulp1 protease family protein, GO:0008234 [cysteine-type peptidase activity] GO:0006508 [proteolysis and peptidolysis] | Inserted fragment within model                        |
| 349000 | 350000 | E=8.9e-06 | At4g08880.1 | T3H13.8, Ulp1 protease family protein, GO:0008234 [cysteine-type peptidase activity] GO:0006508 [proteolysis and peptidolysis] | Inserted fragment within model                        |
| 351000 | 352000 | E=7.1e-07 | At1g62760.1 | F23N19.12, invertase/pectin methylesterase inhibitor family protein, GO:0046910 [pectinesterase inhibitor activity]            | Predicted transposon                                  |
| 351500 | 352500 | E=7.5e-08 | At1g62760.1 | F23N19.12, invertase/pectin methylesterase inhibitor family protein, GO:0046910 [pectinesterase inhibitor activity]            | Predicted transposon                                  |

#### CONTIG B

| Start | Stop  | Score      | BLASTn hit  | Description                                                                                                                                                                            | Classification           |
|-------|-------|------------|-------------|----------------------------------------------------------------------------------------------------------------------------------------------------------------------------------------|--------------------------|
| 3500  | 4500  | E=2.3e-41  | At5g47620.2 | MNJ7.21, heterogeneous nuclear ribonucleoprotein, putative / hnRNP, putative, GO:0003723 [RNA binding]                                                                                 | Conserved collinear gene |
| 4000  | 5000  | E=1.1e-125 | At5g47620.2 | MNJ7.21, heterogeneous nuclear ribonucleoprotein, putative / hnRNP, putative, GO:0003723 [RNA binding]                                                                                 | Conserved collinear gene |
| 4500  | 5500  | E=1.1e-93  | At5g47620.2 | MNJ7.21, heterogeneous nuclear ribonucleoprotein, putative / hnRNP, putative, GO:0003723 [RNA binding]                                                                                 | Conserved collinear gene |
| 5000  | 6000  | E=3.2e-59  | At5g47620.2 | MNJ7.21, heterogeneous nuclear ribonucleoprotein, putative / hnRNP, putative, GO:0003723 [RNA binding]                                                                                 | Conserved collinear gene |
| 6500  | 7500  | E=1.2e-20  | At5g47570.1 | MNJ7.16, expressed protein, GO:0005554 [molecular_function unknown]                                                                                                                    | Conserved collinear gene |
| 7000  | 8000  | E=2.1e-35  | At5g47570.1 | MNJ7.16, expressed protein, GO:0005554 [molecular_function unknown]                                                                                                                    | Conserved collinear gene |
| 7500  | 8500  | E=2.0e-18  | At5g47570.1 | MNJ7.16, expressed protein, GO:0005554 [molecular_function unknown]                                                                                                                    | Conserved collinear gene |
| 9500  | 10500 | E=9.0e-29  | At5g47560.1 | MNJ7.15, sodium/dicarboxylate cotransporter, putative, GO:0017153 [sodium:dicarboxylate symporter activity] GO:0006835 [dicarboxylic acid transport] GO:0006814 [sodium ion transport] | Conserved collinear gene |
| 10000 | 11000 | E=2.7e-71  | At5g47560.1 | MNJ7.15, sodium/dicarboxylate cotransporter, putative, GO:0017153 [sodium:dicarboxylate symporter activity] GO:0006835 [dicarboxylic                                                   | Conserved collinear gene |

|       |       |            |             |                                                                                                                                                                                                                                             |                                       |
|-------|-------|------------|-------------|---------------------------------------------------------------------------------------------------------------------------------------------------------------------------------------------------------------------------------------------|---------------------------------------|
| 10500 | 11500 | E=1.6e-63  | At5g47560.1 | acid transport] GO:0006814 [sodium ion transport]<br>MNJ7.15, sodium/dicarboxylate cotransporter, putative, GO:0017153 [sodium:dicarboxylate symporter activity] GO:0006835 [dicarboxylic acid transport] GO:0006814 [sodium ion transport] | Conserved collinear gene              |
| 11000 | 12000 | E=9.8e-109 | At5g47560.1 | MNJ7.15, sodium/dicarboxylate cotransporter, putative, GO:0017153 [sodium:dicarboxylate symporter activity] GO:0006835 [dicarboxylic acid transport] GO:0006814 [sodium ion transport]                                                      | Conserved collinear gene              |
| 11500 | 12500 | E=2.6e-169 | At5g47560.1 | MNJ7.15, sodium/dicarboxylate cotransporter, putative, GO:0017153 [sodium:dicarboxylate symporter activity] GO:0006835 [dicarboxylic acid transport] GO:0006814 [sodium ion transport]                                                      | Conserved collinear gene              |
| 12000 | 13000 | E=1.1e-87  | At5g47560.1 | MNJ7.15, sodium/dicarboxylate cotransporter, putative, GO:0017153 [sodium:dicarboxylate symporter activity] GO:0006835 [dicarboxylic acid transport] GO:0006814 [sodium ion transport]                                                      | Conserved collinear gene              |
| 20000 | 21000 | E=5.1e-20  | At5g47550.1 | MNJ7.14, cysteine protease inhibitor, putative / cystatin, putative, GO:0004869 [cysteine protease inhibitor activity]                                                                                                                      | Conserved collinear gene              |
| 20500 | 21500 | E=7.4e-24  | At5g47550.1 | MNJ7.14, cysteine protease inhibitor, putative / cystatin, putative, GO:0004869 [cysteine protease inhibitor activity]                                                                                                                      | Conserved collinear gene              |
| 27000 | 28000 | E=3.9e-39  | At2g15520.1 | F9O13.7, zinc finger protein, putative, GO:0005554 [molecular_function unknown]                                                                                                                                                             | Predicted transposon                  |
| 27500 | 28500 | E=4.2e-36  | At2g15520.1 | F9O13.7, zinc finger protein, putative, GO:0005554 [molecular_function unknown]                                                                                                                                                             | Predicted transposon                  |
| 32500 | 33500 | E=4.1e-09  | At5g47540.1 | MNJ7.13, Mo25 family protein, GO:0005554 [molecular_function unknown]                                                                                                                                                                       | Conserved collinear gene              |
| 33000 | 34000 | E=2.7e-59  | At5g47540.1 | MNJ7.13, Mo25 family protein, GO:0005554 [molecular_function unknown]                                                                                                                                                                       | Conserved collinear gene              |
| 33500 | 34500 | E=3.3e-71  | At5g47540.1 | MNJ7.13, Mo25 family protein, GO:0005554 [molecular_function unknown]                                                                                                                                                                       | Conserved collinear gene              |
| 34000 | 35000 | E=2.0e-35  | At5g47540.1 | MNJ7.13, Mo25 family protein, GO:0005554 [molecular_function unknown]                                                                                                                                                                       | Conserved collinear gene              |
| 34500 | 35500 | E=4.5e-35  | At5g47540.1 | MNJ7.13, Mo25 family protein, GO:0005554 [molecular_function unknown]                                                                                                                                                                       | Conserved collinear gene              |
| 35000 | 36000 | E=7.6e-70  | At5g47530.1 | MNJ7.12, auxin-responsive protein, putative, GO:0016020 [membrane] GO:0007275 [development] GO:0005554 [molecular_function unknown]                                                                                                         | Conserved collinear gene              |
| 35500 | 36500 | E=2.1e-106 | At5g47530.1 | MNJ7.12, auxin-responsive protein, putative, GO:0016020 [membrane] GO:0007275 [development] GO:0005554 [molecular_function unknown]                                                                                                         | Conserved collinear gene              |
| 36000 | 37000 | E=1.4e-32  | At5g47530.1 | MNJ7.12, auxin-responsive protein, putative, GO:0016020 [membrane] GO:0007275 [development] GO:0005554 [molecular_function unknown]                                                                                                         | Conserved collinear gene              |
| 38500 | 39500 | E=3.5e-17  | At5g14700.1 | T15N1.190, cinnamoyl-CoA reductase-related, GO:0016621 [cinnamoyl-CoA reductase activity] GO:0009809 [lignin biosynthesis]                                                                                                                  | Inserted fragment outside gene models |

|       |       |            |             |                                                                                                                                                |                                       |
|-------|-------|------------|-------------|------------------------------------------------------------------------------------------------------------------------------------------------|---------------------------------------|
| 39000 | 40000 | E=3.5e-17  | At5g14700.1 | T15N1.190, cinnamoyl-CoA reductase-related, GO:0016621 [cinnamoyl-CoA reductase activity] GO:0009809 [lignin biosynthesis]                     | Inserted fragment outside gene models |
| 40000 | 41000 | E=7.7e-18  | At1g70490.3 | F24J13.6, ADP-ribosylation factor, putative, GO:0003926 [ARF small monomeric GTPase activity]                                                  | Inserted fragment within model        |
| 40500 | 41500 | E=1.0e-34  | At2g47170.1 | T8I13.1, ADP-ribosylation factor 1 (ARF1), GO:0003926 [ARF small monomeric GTPase activity] GO:0005798 [Golgi vesicle]                         | Inserted fragment within model        |
| 41000 | 42000 | E=2.3e-48  | At3g16380.1 | T2O4.4, polyadenylate-binding protein, putative / PABP, putative, GO:0003723 [RNA binding] GO:0003743 [translation initiation factor activity] | Inserted fragment within model        |
| 41500 | 42500 | E=1.5e-48  | At3g16380.1 | T2O4.4, polyadenylate-binding protein, putative / PABP, putative, GO:0003723 [RNA binding] GO:0003743 [translation initiation factor activity] | Inserted fragment within model        |
| 45500 | 46500 | E=7.4e-06  | At3g28770.1 | T19N8.6, expressed protein, GO:0005554 [molecular_function unknown]                                                                            | Predicted transposon                  |
| 46000 | 47000 | E=1.2e-06  | At3g28770.1 | T19N8.6, expressed protein, GO:0005554 [molecular_function unknown]                                                                            | Predicted transposon                  |
| 49000 | 50000 | E=4.7e-73  | At5g47520.1 | MNJ7.11, Ras-related GTP-binding protein, putative, GO:0005525 [GTP binding]                                                                   | Conserved collinear gene              |
| 49500 | 50500 | E=7.5e-108 | At5g47520.1 | MNJ7.11, Ras-related GTP-binding protein, putative, GO:0005525 [GTP binding]                                                                   | Conserved collinear gene              |
| 50000 | 51000 | E=2.8e-34  | At5g47520.1 | MNJ7.11, Ras-related GTP-binding protein, putative, GO:0005525 [GTP binding]                                                                   | Conserved collinear gene              |
| 52000 | 53000 | E=9.2e-45  | At5g47490.1 | MNJ7.8, expressed protein, GO:0005554 [molecular_function unknown]                                                                             | Conserved collinear gene              |
| 52500 | 53500 | E=4.4e-73  | At5g47490.1 | MNJ7.8, expressed protein, GO:0005554 [molecular_function unknown]                                                                             | Conserved collinear gene              |
| 53000 | 54000 | E=3.4e-65  | At5g47480.1 | MNJ7.7, expressed protein, GO:0005554 [molecular_function unknown]                                                                             | Conserved collinear gene              |
| 53500 | 54500 | E=6.3e-68  | At5g47480.1 | MNJ7.7, expressed protein, GO:0005554 [molecular_function unknown]                                                                             | Conserved collinear gene              |
| 54000 | 55000 | E=2.1e-51  | At5g47490.1 | MNJ7.8, expressed protein, GO:0005554 [molecular_function unknown]                                                                             | Conserved collinear gene              |
| 54500 | 55500 | E=2.7e-46  | At5g47490.1 | MNJ7.8, expressed protein, GO:0005554 [molecular_function unknown]                                                                             | Conserved collinear gene              |
| 55000 | 56000 | E=1.2e-59  | At5g47480.1 | MNJ7.7, expressed protein, GO:0005554 [molecular_function unknown]                                                                             | Conserved collinear gene              |
| 55500 | 56500 | E=4.1e-    | At5g47490.1 | MNJ7.8, expressed protein, GO:0005554 [molecular_function unknown]                                                                             | Conserved                             |



|       |       |            |             |                                                                                                                                                          |                                       |
|-------|-------|------------|-------------|----------------------------------------------------------------------------------------------------------------------------------------------------------|---------------------------------------|
|       |       | 104        |             | unknown] GO:0008372 [cellular_component unknown] GO:0005554 [molecular_function unknown]                                                                 | relocated gene                        |
| 68000 | 69000 | E=1.0e-107 | At3g15310.1 | K7L4.11, expressed protein, GO:0000004 [biological_process unknown] GO:0008372 [cellular_component unknown] GO:0005554 [molecular_function unknown]      | Largely intact relocated gene         |
| 68500 | 69500 | E=2.6e-37  | At3g15310.1 | K7L4.11, expressed protein, GO:0000004 [biological_process unknown] GO:0008372 [cellular_component unknown] GO:0005554 [molecular_function unknown]      | Largely intact relocated gene         |
| 69500 | 70500 | E=4.8e-38  | At2g16140.1 | F7H1.16, expressed protein, GO:0005554 [molecular_function unknown]                                                                                      | Inserted fragment within model        |
| 70000 | 71000 | E=5.2e-28  | At2g16140.1 | F7H1.16, expressed protein, GO:0005554 [molecular_function unknown]                                                                                      | Inserted fragment within model        |
| 71000 | 72000 | E=2.3e-07  | At2g18540.1 | F24H14.11, cupin family protein, GO:0000004 [biological_process unknown] GO:0008372 [cellular_component unknown] GO:0005554 [molecular_function unknown] | Inserted fragment within model        |
| 74500 | 75500 | E=1.3e-09  | At2g07240.1 | T13E11.1, Ulp1 protease family protein, GO:0008234 [cysteine-type peptidase activity] GO:0006508 [proteolysis and peptidolysis]                          | Inserted fragment within model        |
| 77000 | 78000 | E=4.4e-08  | At5g28250.1 | T8M17.20, Ulp1 protease family protein, GO:0008234 [cysteine-type peptidase activity] GO:0006508 [proteolysis and peptidolysis]                          | Inserted fragment within model        |
| 77500 | 78500 | E=6.0e-30  | At5g28250.1 | T8M17.20, Ulp1 protease family protein, GO:0008234 [cysteine-type peptidase activity] GO:0006508 [proteolysis and peptidolysis]                          | Inserted fragment within model        |
| 82000 | 83000 | E=7.0e-07  | At3g52410.1 | F22O6.210, hypothetical protein, GO:0000004 [biological_process unknown] GO:0008372 [cellular_component unknown] GO:0005554 [molecular_function unknown] | Inserted fragment outside gene models |
| 83500 | 84500 | E=9.7e-12  | At5g47430.1 | MQL5.29, expressed protein, GO:0005554 [molecular_function unknown]                                                                                      | Conserved collinear gene              |
| 84000 | 85000 | E=2.0e-29  | At5g47430.1 | MQL5.29, expressed protein, GO:0005554 [molecular_function unknown]                                                                                      | Conserved collinear gene              |
| 84500 | 85500 | E=5.7e-28  | At5g47430.1 | MQL5.29, expressed protein, GO:0005554 [molecular_function unknown]                                                                                      | Conserved collinear gene              |
| 85000 | 86000 | E=1.1e-58  | At5g47430.1 | MQL5.29, expressed protein, GO:0005554 [molecular_function unknown]                                                                                      | Conserved collinear gene              |
| 85500 | 86500 | E=9.9e-83  | At5g47430.1 | MQL5.29, expressed protein, GO:0005554 [molecular_function unknown]                                                                                      | Conserved collinear gene              |
| 86000 | 87000 | E=7.3e-    | At5g47430.1 | MQL5.29, expressed protein, GO:0005554 [molecular_function                                                                                               | Conserved                             |

|       |        |           |             |                                                                                                                                                     |  |                          |
|-------|--------|-----------|-------------|-----------------------------------------------------------------------------------------------------------------------------------------------------|--|--------------------------|
|       |        | 70        |             | unknown]                                                                                                                                            |  | collinear gene           |
| 86500 | 87500  | E=1.9e-67 | At5g47430.1 | MQL5.29, expressed protein, GO:0005554 [molecular_function unknown]                                                                                 |  | Conserved collinear gene |
| 87000 | 88000  | E=5.5e-64 | At5g47430.1 | MQL5.29, expressed protein, GO:0005554 [molecular_function unknown]                                                                                 |  | Conserved collinear gene |
| 87500 | 88500  | E=1.2e-62 | At5g47430.1 | MQL5.29, expressed protein, GO:0005554 [molecular_function unknown]                                                                                 |  | Conserved collinear gene |
| 88000 | 89000  | E=2.8e-64 | At5g47430.1 | MQL5.29, expressed protein, GO:0005554 [molecular_function unknown]                                                                                 |  | Conserved collinear gene |
| 88500 | 89500  | E=1.8e-48 | At5g47430.1 | MQL5.29, expressed protein, GO:0005554 [molecular_function unknown]                                                                                 |  | Conserved collinear gene |
| 89000 | 90000  | E=9.0e-27 | At5g47430.1 | MQL5.29, expressed protein, GO:0005554 [molecular_function unknown]                                                                                 |  | Conserved collinear gene |
| 89500 | 90500  | E=7.3e-41 | At5g47390.1 | MQL5.25, myb family transcription factor, GO:0003677 [DNA binding] GO:0003700 [transcription factor activity]                                       |  | Conserved collinear gene |
| 90000 | 91000  | E=3.3e-74 | At5g47390.1 | MQL5.25, myb family transcription factor, GO:0003677 [DNA binding] GO:0003700 [transcription factor activity]                                       |  | Conserved collinear gene |
| 90500 | 91500  | E=6.1e-67 | At5g47390.1 | MQL5.25, myb family transcription factor, GO:0003677 [DNA binding] GO:0003700 [transcription factor activity]                                       |  | Conserved collinear gene |
| 91000 | 92000  | E=5.0e-35 | At5g47390.1 | MQL5.25, myb family transcription factor, GO:0003677 [DNA binding] GO:0003700 [transcription factor activity]                                       |  | Conserved collinear gene |
| 96500 | 97500  | E=4.3e-25 | At5g47380.1 | MQL5.24, expressed protein, GO:0000004 [biological_process unknown] GO:0008372 [cellular_component unknown] GO:0005554 [molecular_function unknown] |  | Conserved collinear gene |
| 97000 | 98000  | E=1.7e-83 | At5g47380.1 | MQL5.24, expressed protein, GO:0000004 [biological_process unknown] GO:0008372 [cellular_component unknown] GO:0005554 [molecular_function unknown] |  | Conserved collinear gene |
| 97500 | 98500  | E=5.0e-99 | At5g47380.1 | MQL5.24, expressed protein, GO:0000004 [biological_process unknown] GO:0008372 [cellular_component unknown] GO:0005554 [molecular_function unknown] |  | Conserved collinear gene |
| 98000 | 99000  | E=7.7e-58 | At5g47380.1 | MQL5.24, expressed protein, GO:0000004 [biological_process unknown] GO:0008372 [cellular_component unknown] GO:0005554 [molecular_function unknown] |  | Conserved collinear gene |
| 98500 | 99500  | E=4.6e-68 | At5g47380.1 | MQL5.24, expressed protein, GO:0000004 [biological_process unknown] GO:0008372 [cellular_component unknown] GO:0005554 [molecular_function unknown] |  | Conserved collinear gene |
| 99000 | 100000 | E=1.6e-51 | At5g47380.1 | MQL5.24, expressed protein, GO:0000004 [biological_process unknown] GO:0008372 [cellular_component unknown] GO:0005554 [molecular_function unknown] |  | Conserved collinear gene |
| 99500 | 100500 | E=6.5e-16 | At2g37560.1 | F13M22.6, origin recognition complex subunit 2 (ORC2), GO:0003688 [DNA replication origin binding] GO:0006260 [DNA replication]                     |  | Inserted fragment        |

|        |        | GO:0000808 [origin of replication recognition complex] |             |                                                                                                                                                                                                                                                                                 |                                                       |
|--------|--------|--------------------------------------------------------|-------------|---------------------------------------------------------------------------------------------------------------------------------------------------------------------------------------------------------------------------------------------------------------------------------|-------------------------------------------------------|
| 104000 | 105000 | E=1.1e-12                                              | At5g32482.1 | T15F17.6, zinc knuckle (CCHC-type) family protein, GO:0003676 [nucleic acid binding]                                                                                                                                                                                            | outside gene models<br>Inserted fragment within model |
| 104500 | 105500 | E=2.9e-30                                              | At5g32482.1 | T15F17.6, zinc knuckle (CCHC-type) family protein, GO:0003676 [nucleic acid binding]                                                                                                                                                                                            | Inserted fragment within model                        |
| 117000 | 118000 | E=7.3e-40                                              | At5g47370.1 | MQL5.23, homeobox-leucine zipper protein 2 (HAT2) / HD-ZIP protein 2, GO:0009826 [cell elongation] GO:0009733 [response to auxin stimulus] GO:0005634 [nucleus] GO:0003677 [DNA binding] GO:0006355 [regulation of transcription, DNA-dependent] GO:0009734 [auxin mediated si] | Conserved collinear gene                              |
| 117500 | 118500 | E=7.9e-81                                              | At5g47370.1 | MQL5.23, homeobox-leucine zipper protein 2 (HAT2) / HD-ZIP protein 2, GO:0009826 [cell elongation] GO:0009733 [response to auxin stimulus] GO:0005634 [nucleus] GO:0003677 [DNA binding] GO:0006355 [regulation of transcription, DNA-dependent] GO:0009734 [auxin mediated si] | Conserved collinear gene                              |
| 118000 | 119000 | E=3.6e-47                                              | At5g47370.1 | MQL5.23, homeobox-leucine zipper protein 2 (HAT2) / HD-ZIP protein 2, GO:0009826 [cell elongation] GO:0009733 [response to auxin stimulus] GO:0005634 [nucleus] GO:0003677 [DNA binding] GO:0006355 [regulation of transcription, DNA-dependent] GO:0009734 [auxin mediated si] | Conserved collinear gene                              |
| 121500 | 122500 | E=5.3e-09                                              | At4g23160.1 | F21P8.50, protein kinase family protein, GO:0016301 [kinase activity]                                                                                                                                                                                                           | Predicted transposon                                  |
| 122000 | 123000 | E=2.0e-08                                              | At4g23160.1 | F21P8.50, protein kinase family protein, GO:0016301 [kinase activity]                                                                                                                                                                                                           | Predicted transposon                                  |
| 122500 | 123500 | E=1.6e-07                                              | At4g03940.1 | T24M8.7, expressed protein, GO:0005554 [molecular_function] unknown]                                                                                                                                                                                                            | Predicted transposon                                  |
| 125000 | 126000 | E=3.5e-38                                              | At5g47360.1 | MQL5.22, pentatricopeptide (PPR) repeat-containing protein, GO:0000004 [biological_process unknown] GO:0008372 [cellular_component unknown] GO:0005554 [molecular_function unknown]                                                                                             | Additional collinear gene fragment                    |
| 125500 | 126500 | E=4.3e-47                                              | At5g47360.1 | MQL5.22, pentatricopeptide (PPR) repeat-containing protein, GO:0000004 [biological_process unknown] GO:0008372 [cellular_component unknown] GO:0005554 [molecular_function unknown]                                                                                             | Additional collinear gene fragment                    |
| 126000 | 127000 | E=8.5e-34                                              | At5g47360.1 | MQL5.22, pentatricopeptide (PPR) repeat-containing protein, GO:0000004 [biological_process unknown] GO:0008372 [cellular_component unknown] GO:0005554 [molecular_function unknown]                                                                                             | Additional collinear gene fragment                    |

|        |        |            |             |                                                                                                                                                        |                                       |
|--------|--------|------------|-------------|--------------------------------------------------------------------------------------------------------------------------------------------------------|---------------------------------------|
| 126500 | 127500 | E=1.3e-38  | At5g47330.1 | MQL5.19, palmitoyl protein thioesterase family protein, GO:0008474 [palmitoyl-(protein) hydrolase activity]                                            | Conserved collinear gene              |
| 127000 | 128000 | E=6.9e-62  | At5g47330.1 | MQL5.19, palmitoyl protein thioesterase family protein, GO:0008474 [palmitoyl-(protein) hydrolase activity]                                            | Conserved collinear gene              |
| 127500 | 128500 | E=1.1e-16  | At5g47340.1 | MQL5.20, palmitoyl protein thioesterase family protein, GO:0008474 [palmitoyl-(protein) hydrolase activity]                                            | Conserved collinear gene              |
| 132000 | 133000 | E=5.4e-09  | At5g47330.1 | MQL5.19, palmitoyl protein thioesterase family protein, GO:0008474 [palmitoyl-(protein) hydrolase activity]                                            | Conserved collinear gene              |
| 132500 | 133500 | E=5.2e-49  | At5g47330.1 | MQL5.19, palmitoyl protein thioesterase family protein, GO:0008474 [palmitoyl-(protein) hydrolase activity]                                            | Conserved collinear gene              |
| 133000 | 134000 | E=2.4e-31  | At5g47350.1 | MQL5.21, palmitoyl protein thioesterase family protein, GO:0008474 [palmitoyl-(protein) hydrolase activity]                                            | Conserved collinear gene              |
| 133500 | 134500 | E=3.9e-08  | At1g43170.2 | F1I21.1, 60S ribosomal protein L3 (RPL3A), GO:0005840 [ribosome] GO:0006412 [protein biosynthesis] GO:0003735 [structural constituent of ribosome]     | Inserted fragment within model        |
| 134000 | 135000 | E=3.9e-08  | At1g43170.2 | F1I21.1, 60S ribosomal protein L3 (RPL3A), GO:0005840 [ribosome] GO:0006412 [protein biosynthesis] GO:0003735 [structural constituent of ribosome]     | Inserted fragment within model        |
| 135500 | 136500 | E=3.6e-10  | At3g52680.1 | F3C22.80, F-box family protein, GO:0005554 [molecular_function unknown]                                                                                | Inserted fragment outside gene models |
| 136000 | 137000 | E=2.7e-30  | At5g47240.1 | MQL5.10, MutT/nudix family protein, GO:0016787 [hydrolase activity]                                                                                    | Conserved collinear gene              |
| 136500 | 137500 | E=1.7e-60  | At5g47240.1 | MQL5.10, MutT/nudix family protein, GO:0016787 [hydrolase activity]                                                                                    | Conserved collinear gene              |
| 137000 | 138000 | E=3.0e-24  | At5g47240.1 | MQL5.10, MutT/nudix family protein, GO:0016787 [hydrolase activity]                                                                                    | Conserved collinear gene              |
| 137500 | 138500 | E=6.6e-32  | At5g47240.1 | MQL5.10, MutT/nudix family protein, GO:0016787 [hydrolase activity]                                                                                    | Conserved collinear gene              |
| 138500 | 139500 | E=2.1e-15  | At4g13340.1 | T9E8.80, leucine-rich repeat family protein / extensin family protein, GO:0000004 [biological_process unknown] GO:0005554 [molecular_function unknown] | Predicted transposon                  |
| 139000 | 140000 | E=2.5e-18  | At4g13340.1 | T9E8.80, leucine-rich repeat family protein / extensin family protein, GO:0000004 [biological_process unknown] GO:0005554 [molecular_function unknown] | Predicted transposon                  |
| 144000 | 145000 | E=5.9e-46  | At1g19260.1 | T29M8.13, hAT dimerisation domain-containing protein, GO:0005554 [molecular_function unknown]                                                          | Predicted transposon                  |
| 144500 | 145500 | E=2.4e-107 | At1g19260.1 | T29M8.13, hAT dimerisation domain-containing protein, GO:0005554 [molecular_function unknown]                                                          | Predicted transposon                  |
| 145000 | 146000 | E=3.4e-    | At1g19260.1 | T29M8.13, hAT dimerisation domain-containing protein, GO:0005554                                                                                       | Predicted                             |



|        |        |           |             |                                                                                                                                                                                                                                                               |                                       |
|--------|--------|-----------|-------------|---------------------------------------------------------------------------------------------------------------------------------------------------------------------------------------------------------------------------------------------------------------|---------------------------------------|
|        |        | 111       |             | [molecular_function unknown]                                                                                                                                                                                                                                  | transposon                            |
| 145500 | 146500 | E=2.4e-86 | At1g41920.1 | F5A13.9, hypothetical protein, GO:0005554 [molecular_function unknown]                                                                                                                                                                                        | Predicted transposon                  |
| 146000 | 147000 | E=5.5e-33 | At1g19260.1 | T29M8.13, hAT dimerisation domain-containing protein, GO:0005554 [molecular_function unknown]                                                                                                                                                                 | Predicted transposon                  |
| 147500 | 148500 | E=6.3e-32 | At5g47230.1 | MQL5.9, ethylene-responsive element-binding factor 5 (ERF5), GO:0005634 [nucleus] GO:0003677 [DNA binding] GO:0006355 [regulation of transcription, DNA-dependent] GO:0016563 [transcriptional activator activity] GO:0003700 [transcription factor activity] | Conserved collinear gene              |
| 148000 | 149000 | E=2.5e-97 | At5g47230.1 | MQL5.9, ethylene-responsive element-binding factor 5 (ERF5), GO:0005634 [nucleus] GO:0003677 [DNA binding] GO:0006355 [regulation of transcription, DNA-dependent] GO:0016563 [transcriptional activator activity] GO:0003700 [transcription factor activity] | Conserved collinear gene              |
| 148500 | 149500 | E=4.3e-62 | At5g47230.1 | MQL5.9, ethylene-responsive element-binding factor 5 (ERF5), GO:0005634 [nucleus] GO:0003677 [DNA binding] GO:0006355 [regulation of transcription, DNA-dependent] GO:0016563 [transcriptional activator activity] GO:0003700 [transcription factor activity] | Conserved collinear gene              |
| 149000 | 150000 | E=2.0e-12 | At5g47230.1 | MQL5.9, ethylene-responsive element-binding factor 5 (ERF5), GO:0005634 [nucleus] GO:0003677 [DNA binding] GO:0006355 [regulation of transcription, DNA-dependent] GO:0016563 [transcriptional activator activity] GO:0003700 [transcription factor activity] | Conserved collinear gene              |
| 152000 | 153000 | E=1.4e-07 | At5g47225.1 | MQL5.8, hypothetical protein, GO:0005554 [molecular_function unknown]                                                                                                                                                                                         | Predicted transposon                  |
| 156000 | 157000 | E=5.3e-07 | At5g47225.1 | MQL5.8, hypothetical protein, GO:0005554 [molecular_function unknown]                                                                                                                                                                                         | Inserted fragment within model        |
| 156500 | 157500 | E=5.3e-07 | At5g47225.1 | MQL5.8, hypothetical protein, GO:0005554 [molecular_function unknown]                                                                                                                                                                                         | Inserted fragment within model        |
| 176500 | 177500 | E=1.0e-15 | At3g01750.1 | F28J7.8, ankyrin repeat family protein, GO:0005515 [protein binding]                                                                                                                                                                                          | Inserted fragment outside gene models |
| 177000 | 178000 | E=1.8e-15 | At3g01750.1 | F28J7.8, ankyrin repeat family protein, GO:0005515 [protein binding]                                                                                                                                                                                          | Inserted fragment outside gene models |

|        |        |           |             |                                                                                                                                                                                                                                                                                           |                                       |
|--------|--------|-----------|-------------|-------------------------------------------------------------------------------------------------------------------------------------------------------------------------------------------------------------------------------------------------------------------------------------------|---------------------------------------|
| 181500 | 182500 | E=9.0e-08 | At1g12725.1 | T12C24.25, hypothetical protein, GO:0005554 [molecular_function unknown]                                                                                                                                                                                                                  | Inserted fragment within model        |
| 182000 | 183000 | E=9.0e-08 | At1g12725.1 | T12C24.25, hypothetical protein, GO:0005554 [molecular_function unknown]                                                                                                                                                                                                                  | Inserted fragment within model        |
| 183000 | 184000 | E=1.9e-22 | At5g47220.1 | MQL5.7, ethylene-responsive element-binding factor 2 (ERF2), GO:0003677 [DNA binding] GO:0045941 [positive regulation of transcription] GO:0006355 [regulation of transcription, DNA-dependent] GO:0016563 [transcriptional activator activity] GO:0008372 [cellular_                     | Conserved collinear gene              |
| 183500 | 184500 | E=4.1e-68 | At5g47220.1 | MQL5.7, ethylene-responsive element-binding factor 2 (ERF2), GO:0003677 [DNA binding] GO:0045941 [positive regulation of transcription] GO:0006355 [regulation of transcription, DNA-dependent] GO:0016563 [transcriptional activator activity] GO:0008372 [cellular_                     | Conserved collinear gene              |
| 184000 | 185000 | E=1.4e-47 | At4g17500.1 | FCAALL.123, ethylene-responsive element-binding protein 1 (ERF1) / EREBP-2 protein, GO:0005643 [nuclear pore] GO:0003677 [DNA binding] GO:0006355 [regulation of transcription, DNA-dependent] GO:0016563 [transcriptional activator activity] GO:0003700 [transcription factor activity] | Conserved collinear gene              |
| 195500 | 196500 | E=1.3e-25 | At2g15620.1 | F9O13.17, ferredoxin--nitrite reductase, putative, GO:0006118 [electron transport] GO:0050421 [nitrite reductase (NO-forming) activity] GO:0047889 [ferredoxin-nitrate reductase activity]                                                                                                | Inserted fragment within model        |
| 196000 | 197000 | E=1.1e-25 | At2g15620.1 | F9O13.17, ferredoxin--nitrite reductase, putative, GO:0006118 [electron transport] GO:0050421 [nitrite reductase (NO-forming) activity] GO:0047889 [ferredoxin-nitrate reductase activity]                                                                                                | Inserted fragment within model        |
| 201000 | 202000 | E=1.5e-06 | At3g28770.1 | T19N8.6, expressed protein, GO:0005554 [molecular_function unknown]                                                                                                                                                                                                                       | Inserted fragment outside gene models |
| 213500 | 214500 | E=4.8e-37 | At2g12905.1 | T19K21.20, expressed protein, GO:0005554 [molecular_function unknown]                                                                                                                                                                                                                     | .                                     |
| 214000 | 215000 | E=4.8e-37 | At2g12905.1 | T19K21.20, expressed protein, GO:0005554 [molecular_function unknown]                                                                                                                                                                                                                     | .                                     |
| 220500 | 221500 | E=8.3e-18 | At5g47210.1 | MQL5.6, nuclear RNA-binding protein, putative, GO:0003723 [RNA binding]                                                                                                                                                                                                                   | Conserved collinear gene              |
| 221000 | 222000 | E=6.9e-43 | At5g47210.1 | MQL5.6, nuclear RNA-binding protein, putative, GO:0003723 [RNA binding]                                                                                                                                                                                                                   | Conserved collinear gene              |
| 221500 | 222500 | E=1.4e-63 | At5g47210.1 | MQL5.6, nuclear RNA-binding protein, putative, GO:0003723 [RNA binding]                                                                                                                                                                                                                   | Conserved collinear gene              |
| 222000 | 223000 | E=4.9e-62 | At5g47210.1 | MQL5.6, nuclear RNA-binding protein, putative, GO:0003723 [RNA binding]                                                                                                                                                                                                                   | Conserved collinear gene              |

|        |        |           |             |                                                                                                                                                                                           |                          |
|--------|--------|-----------|-------------|-------------------------------------------------------------------------------------------------------------------------------------------------------------------------------------------|--------------------------|
| 222500 | 223500 | E=3.9e-12 | At5g47200.1 | MQL5.5, Ras-related GTP-binding protein, putative, GO:0005525 [GTP binding]                                                                                                               | Conserved collinear gene |
| 223000 | 224000 | E=9.2e-61 | At5g47200.1 | MQL5.5, Ras-related GTP-binding protein, putative, GO:0005525 [GTP binding]                                                                                                               | Conserved collinear gene |
| 223500 | 224500 | E=1.0e-68 | At5g47200.1 | MQL5.5, Ras-related GTP-binding protein, putative, GO:0005525 [GTP binding]                                                                                                               | Conserved collinear gene |
| 224000 | 225000 | E=2.2e-26 | At5g47200.1 | MQL5.5, Ras-related GTP-binding protein, putative, GO:0005525 [GTP binding]                                                                                                               | Conserved collinear gene |
| 224500 | 225500 | E=9.2e-06 | At5g47200.1 | MQL5.5, Ras-related GTP-binding protein, putative, GO:0005525 [GTP binding]                                                                                                               | Conserved collinear gene |
| 239000 | 240000 | E=4.3e-22 | At4g17560.1 | FCAALL.39, ribosomal protein L19 family protein, GO:0005840 [ribosome] GO:0007046 [ribosome biogenesis] GO:0006412 [protein biosynthesis] GO:0003735 [structural constituent of ribosome] | Conserved collinear gene |
| 239500 | 240500 | E=4.5e-48 | At5g47190.1 | MQL5.4, ribosomal protein L19 family protein, GO:0005840 [ribosome] GO:0007046 [ribosome biogenesis] GO:0006412 [protein biosynthesis] GO:0003735 [structural constituent of ribosome]    | Conserved collinear gene |
| 240000 | 241000 | E=1.0e-41 | At5g47190.1 | MQL5.4, ribosomal protein L19 family protein, GO:0005840 [ribosome] GO:0007046 [ribosome biogenesis] GO:0006412 [protein biosynthesis] GO:0003735 [structural constituent of ribosome]    | Conserved collinear gene |
| 240500 | 241500 | E=2.5e-17 | At4g17560.1 | FCAALL.39, ribosomal protein L19 family protein, GO:0005840 [ribosome] GO:0007046 [ribosome biogenesis] GO:0006412 [protein biosynthesis] GO:0003735 [structural constituent of ribosome] | Conserved collinear gene |
| 245500 | 246500 | E=4.5e-22 | At5g47180.2 | MQL5.3, vesicle-associated membrane family protein / VAMP family protein, GO:0005198 [structural molecule activity]                                                                       | Conserved collinear gene |
| 246000 | 247000 | E=5.2e-51 | At5g47180.2 | MQL5.3, vesicle-associated membrane family protein / VAMP family protein, GO:0005198 [structural molecule activity]                                                                       | Conserved collinear gene |
| 246500 | 247500 | E=5.5e-50 | At5g47180.2 | MQL5.3, vesicle-associated membrane family protein / VAMP family protein, GO:0005198 [structural molecule activity]                                                                       | Conserved collinear gene |
| 247000 | 248000 | E=1.5e-16 | At5g47180.2 | MQL5.3, vesicle-associated membrane family protein / VAMP family protein, GO:0005198 [structural molecule activity]                                                                       | Conserved collinear gene |
| 247500 | 248500 | E=3.6e-16 | At5g47180.2 | MQL5.3, vesicle-associated membrane family protein / VAMP family protein, GO:0005198 [structural molecule activity]                                                                       | Conserved collinear gene |
| 248000 | 249000 | E=2.7e-23 | At5g47140.1 | K14A3.9, zinc finger (GATA type) family protein, GO:0003700 [transcription factor activity]                                                                                               | Conserved collinear gene |
| 248500 | 249500 | E=3.8e-52 | At5g47140.1 | K14A3.9, zinc finger (GATA type) family protein, GO:0003700 [transcription factor activity]                                                                                               | Conserved collinear gene |
| 249000 | 250000 | E=1.0e-81 | At5g47140.1 | K14A3.9, zinc finger (GATA type) family protein, GO:0003700 [transcription factor activity]                                                                                               | Conserved collinear gene |
| 249500 | 250500 | E=7.3e-83 | At5g47140.1 | K14A3.9, zinc finger (GATA type) family protein, GO:0003700 [transcription factor activity]                                                                                               | Conserved collinear gene |
| 250000 | 251000 | E=1.8e-   | At5g47140.1 | K14A3.9, zinc finger (GATA type) family protein, GO:0003700                                                                                                                               | Conserved                |

|        |        |           |             |                                                                                                                                                                                                                                                            |                                                                  |
|--------|--------|-----------|-------------|------------------------------------------------------------------------------------------------------------------------------------------------------------------------------------------------------------------------------------------------------------|------------------------------------------------------------------|
|        |        | 09        |             | [transcription factor activity]                                                                                                                                                                                                                            | collinear gene<br>Inserted<br>fragment<br>outside gene<br>models |
| 254000 | 255000 | E=4.7e-07 | At5g20920.1 | F22D1.90, eukaryotic translation initiation factor 2 subunit 2, putative / eIF-2-beta, putative, GO:0006413 [translational initiation] GO:0003743 [translation initiation factor activity]                                                                 | Inserted<br>fragment<br>outside gene<br>models                   |
| 254500 | 255500 | E=1.0e-15 | At5g20920.1 | F22D1.90, eukaryotic translation initiation factor 2 subunit 2, putative / eIF-2-beta, putative, GO:0006413 [translational initiation] GO:0003743 [translation initiation factor activity]                                                                 | Inserted<br>fragment<br>outside gene<br>models                   |
| 255000 | 256000 | E=2.0e-10 | At2g32430.1 | T32F6.5, galactosyltransferase family protein, GO:0016758 [transferase activity, transferring hexosyl groups] GO:0016757 [transferase activity, transferring glycosyl groups]                                                                              | Inserted<br>fragment<br>outside gene<br>models                   |
| 255500 | 256500 | E=4.8e-30 | At2g32430.1 | T32F6.5, galactosyltransferase family protein, GO:0016758 [transferase activity, transferring hexosyl groups] GO:0016757 [transferase activity, transferring glycosyl groups]                                                                              | Inserted<br>fragment<br>outside gene<br>models                   |
| 256000 | 257000 | E=2.1e-23 | At2g32430.1 | T32F6.5, galactosyltransferase family protein, GO:0016758 [transferase activity, transferring hexosyl groups] GO:0016757 [transferase activity, transferring glycosyl groups]                                                                              | Inserted<br>fragment<br>outside gene<br>models                   |
| 257000 | 258000 | E=5.8e-34 | At5g47120.1 | K14A3.7, Bax inhibitor-1 putative / BI-1 putative, GO:0005783 [endoplasmic reticulum] GO:0006916 [anti-apoptosis] GO:0005635 [nuclear membrane] GO:0006915 [apoptosis] GO:0016329 [apoptosis regulator activity] GO:0008189 [apoptosis inhibitor activity] | Conserved<br>collinear gene                                      |
| 257500 | 258500 | E=2.3e-55 | At5g47120.1 | K14A3.7, Bax inhibitor-1 putative / BI-1 putative, GO:0005783 [endoplasmic reticulum] GO:0006916 [anti-apoptosis] GO:0005635 [nuclear membrane] GO:0006915 [apoptosis] GO:0016329 [apoptosis regulator activity] GO:0008189 [apoptosis inhibitor activity] | Conserved<br>collinear gene                                      |
| 258000 | 259000 | E=6.0e-53 | At5g47120.1 | K14A3.7, Bax inhibitor-1 putative / BI-1 putative, GO:0005783 [endoplasmic reticulum] GO:0006916 [anti-apoptosis] GO:0005635 [nuclear membrane] GO:0006915 [apoptosis] GO:0016329 [apoptosis regulator activity] GO:0008189 [apoptosis inhibitor activity] | Conserved<br>collinear gene                                      |
| 258500 | 259500 | E=1.5e-14 | At5g47120.1 | K14A3.7, Bax inhibitor-1 putative / BI-1 putative, GO:0005783 [endoplasmic reticulum] GO:0006916 [anti-apoptosis] GO:0005635 [nuclear membrane] GO:0006915 [apoptosis] GO:0016329 [apoptosis regulator activity] GO:0008189 [apoptosis inhibitor activity] | Conserved<br>collinear gene                                      |
| 259000 | 260000 | E=4.6e-21 | At5g47110.1 | K14A3.6, lili3 protein, putative, GO:0009765 [photosynthesis light harvesting] GO:0005554 [molecular_function unknown]                                                                                                                                     | Conserved<br>collinear gene                                      |
| 259500 | 260500 | E=6.5e-47 | At5g47110.1 | K14A3.6, lili3 protein, putative, GO:0009765 [photosynthesis light harvesting] GO:0005554 [molecular_function unknown]                                                                                                                                     | Conserved<br>collinear gene                                      |

|        |        |           |             |                                                                                                                                                                                                |                                    |
|--------|--------|-----------|-------------|------------------------------------------------------------------------------------------------------------------------------------------------------------------------------------------------|------------------------------------|
| 260000 | 261000 | E=6.6e-68 | At5g47110.1 | K14A3.6, lili3 protein, putative, GO:0009765 [photosynthesis light harvesting] GO:0005554 [molecular_function unknown]                                                                         | Conserved collinear gene           |
| 260500 | 261500 | E=6.5e-38 | At5g47110.1 | K14A3.6, lili3 protein, putative, GO:0009765 [photosynthesis light harvesting] GO:0005554 [molecular_function unknown]                                                                         | Conserved collinear gene           |
| 267000 | 268000 | E=2.2e-29 | At3g23690.1 | MYM9.3, basic helix-loop-helix (bHLH) family protein, GO:0003677 [DNA binding] GO:0003700 [transcription factor activity]                                                                      | Inserted fragment within model     |
| 267500 | 268500 | E=1.2e-57 | At3g23690.1 | MYM9.3, basic helix-loop-helix (bHLH) family protein, GO:0003677 [DNA binding] GO:0003700 [transcription factor activity]                                                                      | Inserted fragment within model     |
| 268000 | 269000 | E=4.0e-20 | At3g23690.1 | MYM9.3, basic helix-loop-helix (bHLH) family protein, GO:0003677 [DNA binding] GO:0003700 [transcription factor activity]                                                                      | Inserted fragment within model     |
| 269000 | 270000 | E=1.6e-23 | At4g11710.1 | T5C23.140, hypothetical protein, GO:0005554 [molecular_function unknown]                                                                                                                       | Predicted transposon               |
| 269500 | 270500 | E=1.7e-26 | At4g11710.1 | T5C23.140, hypothetical protein, GO:0005554 [molecular_function unknown]                                                                                                                       | Predicted transposon               |
| 270000 | 271000 | E=3.7e-12 | At1g35570.1 | F15O4.34, hypothetical protein, GO:0005554 [molecular_function unknown]                                                                                                                        | Predicted transposon               |
| 271500 | 272500 | E=2.4e-11 | At5g47100.1 | K14A3.5, calcineurin B-like protein 9 (CBL9), GO:0006950 [response to stress] GO:0008287 [protein serine/threonine phosphatase complex] GO:0005509 [calcium ion binding]                       | Conserved collinear gene           |
| 272000 | 273000 | E=7.7e-27 | At4g17615.2 | FCAALL.122, calcineurin B-like protein 1 (CBL1), GO:0006970 [response to osmotic stress] GO:0019722 [calcium-mediated signaling] GO:0005509 [calcium ion binding] GO:0005886 [plasma membrane] | Conserved collinear gene           |
| 272500 | 273500 | E=2.5e-43 | At5g47100.1 | K14A3.5, calcineurin B-like protein 9 (CBL9), GO:0006950 [response to stress] GO:0008287 [protein serine/threonine phosphatase complex] GO:0005509 [calcium ion binding]                       | Conserved collinear gene           |
| 273000 | 274000 | E=7.2e-41 | At5g47100.1 | K14A3.5, calcineurin B-like protein 9 (CBL9), GO:0006950 [response to stress] GO:0008287 [protein serine/threonine phosphatase complex] GO:0005509 [calcium ion binding]                       | Conserved collinear gene           |
| 273500 | 274500 | E=1.6e-31 | At5g47080.1 | MQD22.23, casein kinase II beta chain, putative, GO:0005956 [protein kinase CK2 complex] GO:0008605 [protein kinase CK2 regulator activity]                                                    | Additional collinear gene fragment |
| 274000 | 275000 | E=1.6e-31 | At5g47080.1 | MQD22.23, casein kinase II beta chain, putative, GO:0005956 [protein kinase CK2 complex] GO:0008605 [protein kinase CK2 regulator activity]                                                    | Additional collinear gene fragment |
| 275500 | 276500 | E=6.3e-44 | At2g45730.1 | F4I18.29, eukaryotic initiation factor 3 gamma subunit family protein, GO:0006446 [regulation of translational initiation] GO:0003743 [translation initiation factor activity]                 | Inserted fragment within model     |
| 276000 | 277000 | E=5.5e-   | At2g45730.1 | F4I18.29, eukaryotic initiation factor 3 gamma subunit family protein,                                                                                                                         | Inserted                           |

|        |        |           |             |                                                                                                                                                                                |                                       |
|--------|--------|-----------|-------------|--------------------------------------------------------------------------------------------------------------------------------------------------------------------------------|---------------------------------------|
|        |        | 70        |             | GO:0006446 [regulation of translational initiation] GO:0003743 [translation initiation factor activity]                                                                        | fragment within model                 |
| 276500 | 277500 | E=6.1e-18 | At2g45730.1 | F4I18.29, eukaryotic initiation factor 3 gamma subunit family protein, GO:0006446 [regulation of translational initiation] GO:0003743 [translation initiation factor activity] | Inserted fragment within model        |
| 279000 | 280000 | E=1.3e-18 | At3g25860.1 | MPE11.6, dihydrolipoamide S-acetyltransferase (LTA2), GO:0004742 [dihydrolipoyllysine-residue acetyltransferase activity] GO:0008152 [metabolism]                              | Inserted fragment outside gene models |
| 279500 | 280500 | E=4.1e-41 | At3g57800.1 | T10K17.10, basic helix-loop-helix (bHLH) family protein, GO:0003677 [DNA binding] GO:0003700 [transcription factor activity]                                                   | Inserted fragment outside gene models |
| 280000 | 281000 | E=4.1e-41 | At3g57800.1 | T10K17.10, basic helix-loop-helix (bHLH) family protein, GO:0003677 [DNA binding] GO:0003700 [transcription factor activity]                                                   | Inserted fragment outside gene models |
| 280500 | 281500 | E=2.1e-19 | At4g17660.1 | FCAALL.77, protein kinase, putative, GO:0016301 [kinase activity]                                                                                                              | Conserved collinear gene              |
| 281000 | 282000 | E=1.5e-21 | At4g17660.1 | FCAALL.77, protein kinase, putative, GO:0016301 [kinase activity]                                                                                                              | Conserved collinear gene              |

#### CONTIG C

| Start | Stop | Score     | BLASTn hit  | Description                                                                                                                                                                        | Classification                 |
|-------|------|-----------|-------------|------------------------------------------------------------------------------------------------------------------------------------------------------------------------------------|--------------------------------|
| 0     | 1000 | E=1.1e-09 | At3g43770.1 | T28A8.60, hypothetical protein, GO:0005554 [molecular_function unknown]                                                                                                            | Inserted fragment within model |
| 500   | 1500 | E=1.9e-14 | At5g13540.1 | T6I14.70, expressed protein, GO:0005554 [molecular_function unknown]                                                                                                               | Inserted fragment within model |
| 1000  | 2000 | E=1.5e-34 | At5g65770.1 | MPA24.12, nuclear matrix constituent protein-related, GO:0005554 [molecular_function unknown]                                                                                      | Inserted fragment within model |
| 1500  | 2500 | E=1.5e-34 | At5g65770.1 | MPA24.12, nuclear matrix constituent protein-related, GO:0005554 [molecular_function unknown]                                                                                      | Inserted fragment within model |
| 2000  | 3000 | E=4.8e-58 | At1g14610.1 | T5E21.11, valyl-tRNA synthetase / valine--tRNA ligase (VALRS), GO:0005524 [ATP binding] GO:0006418 [tRNA aminoacylation for protein translation] GO:0004812 [tRNA ligase activity] | Inserted fragment within model |
| 2500  | 3500 | E=5.9e-   | At1g14610.1 | T5E21.11, valyl-tRNA synthetase / valine--tRNA ligase (VALRS),                                                                                                                     | Inserted                       |

|       |       |            |             |                                                                                                                                                          |                                |
|-------|-------|------------|-------------|----------------------------------------------------------------------------------------------------------------------------------------------------------|--------------------------------|
|       |       | 47         |             | GO:0005524 [ATP binding] GO:0006418 [tRNA aminoacylation for protein translation] GO:0004812 [tRNA ligase activity]                                      | fragment within model          |
| 3000  | 4000  | E=3.4e-38  | At5g54480.1 | F24B18.10, hypothetical protein, GO:0000004 [biological_process unknown] GO:0008372 [cellular_component unknown] GO:0005554 [molecular_function unknown] | Inserted fragment within model |
| 3500  | 4500  | E=1.5e-08  | At5g54480.1 | F24B18.10, hypothetical protein, GO:0000004 [biological_process unknown] GO:0008372 [cellular_component unknown] GO:0005554 [molecular_function unknown] | Inserted fragment within model |
| 5000  | 6000  | E=2.4e-17  | At5g47620.2 | MNJ7.21, heterogeneous nuclear ribonucleoprotein, putative / hnRNP, putative, GO:0003723 [RNA binding]                                                   | Conserved collinear gene       |
| 5500  | 6500  | E=1.2e-55  | At5g47620.2 | MNJ7.21, heterogeneous nuclear ribonucleoprotein, putative / hnRNP, putative, GO:0003723 [RNA binding]                                                   | Conserved collinear gene       |
| 6000  | 7000  | E=2.7e-104 | At5g47620.2 | MNJ7.21, heterogeneous nuclear ribonucleoprotein, putative / hnRNP, putative, GO:0003723 [RNA binding]                                                   | Conserved collinear gene       |
| 6500  | 7500  | E=1.4e-142 | At5g47620.2 | MNJ7.21, heterogeneous nuclear ribonucleoprotein, putative / hnRNP, putative, GO:0003723 [RNA binding]                                                   | Conserved collinear gene       |
| 7000  | 8000  | E=3.5e-65  | At5g47620.2 | MNJ7.21, heterogeneous nuclear ribonucleoprotein, putative / hnRNP, putative, GO:0003723 [RNA binding]                                                   | Conserved collinear gene       |
| 7500  | 8500  | E=4.2e-42  | At5g47610.1 | MNJ7.20, zinc finger (C3HC4-type RING finger) family protein, GO:0005515 [protein binding] GO:0008270 [zinc ion binding]                                 | Conserved collinear gene       |
| 8000  | 9000  | E=7.4e-66  | At5g47610.1 | MNJ7.20, zinc finger (C3HC4-type RING finger) family protein, GO:0005515 [protein binding] GO:0008270 [zinc ion binding]                                 | Conserved collinear gene       |
| 8500  | 9500  | E=6.7e-19  | At5g47610.1 | MNJ7.20, zinc finger (C3HC4-type RING finger) family protein, GO:0005515 [protein binding] GO:0008270 [zinc ion binding]                                 | Conserved collinear gene       |
| 11000 | 12000 | E=1.3e-20  | At5g47590.1 | MNJ7.18, heat shock protein-related, GO:0005554 [molecular_function unknown]                                                                             | fragments only                 |
| 11500 | 12500 | E=1.6e-43  | At5g47590.1 | MNJ7.18, heat shock protein-related, GO:0005554 [molecular_function unknown]                                                                             | fragments only                 |
| 12000 | 13000 | E=4.6e-22  | At5g47590.1 | MNJ7.18, heat shock protein-related, GO:0005554 [molecular_function unknown]                                                                             | fragments only                 |
| 12500 | 13500 | E=3.6e-08  | At2g26310.1 | T1D16.5, expressed protein, GO:0005554 [molecular_function unknown]                                                                                      | Inserted fragment within model |
| 13000 | 14000 | E=2.8e-08  | At5g47600.1 | MNJ7.19, heat shock protein-related, GO:0005554 [molecular_function unknown]                                                                             | Conserved collinear gene       |
| 13500 | 14500 | E=2.7e-38  | At5g47600.1 | MNJ7.19, heat shock protein-related, GO:0005554 [molecular_function unknown]                                                                             | Conserved collinear gene       |
| 14000 | 15000 | E=1.6e-24  | At5g47600.1 | MNJ7.19, heat shock protein-related, GO:0005554 [molecular_function unknown]                                                                             | Conserved collinear gene       |
| 15500 | 16500 | E=1.6e-09  | At5g47590.1 | MNJ7.18, heat shock protein-related, GO:0005554 [molecular_function unknown]                                                                             | Conserved collinear gene       |

|       |       |            |             |                                                                                                                                                                                        |                                |
|-------|-------|------------|-------------|----------------------------------------------------------------------------------------------------------------------------------------------------------------------------------------|--------------------------------|
| 16000 | 17000 | E=5.7e-57  | At5g47590.1 | MNJ7.18, heat shock protein-related, GO:0005554 [molecular_function unknown]                                                                                                           | Conserved collinear gene       |
| 16500 | 17500 | E=9.5e-50  | At5g47590.1 | MNJ7.18, heat shock protein-related, GO:0005554 [molecular_function unknown]                                                                                                           | Conserved collinear gene       |
| 17000 | 18000 | E=1.1e-06  | At2g26310.1 | T1D16.5, expressed protein, GO:0005554 [molecular_function unknown]                                                                                                                    | Inserted fragment within model |
| 17500 | 18500 | E=1.0e-36  | At5g47570.1 | MNJ7.16, expressed protein, GO:0005554 [molecular_function unknown]                                                                                                                    | Conserved collinear gene       |
| 18000 | 19000 | E=5.9e-52  | At5g47570.1 | MNJ7.16, expressed protein, GO:0005554 [molecular_function unknown]                                                                                                                    | Conserved collinear gene       |
| 18500 | 19500 | E=5.6e-11  | At5g47570.1 | MNJ7.16, expressed protein, GO:0005554 [molecular_function unknown]                                                                                                                    | Conserved collinear gene       |
| 29000 | 30000 | E=4.3e-12  | At2g05950.1 | T6P5.15, hypothetical protein, GO:0005554 [molecular_function unknown]                                                                                                                 | Inserted fragment within model |
| 29500 | 30500 | E=4.3e-12  | At2g05950.1 | T6P5.15, hypothetical protein, GO:0005554 [molecular_function unknown]                                                                                                                 | Inserted fragment within model |
| 31000 | 32000 | E=2.2e-29  | At5g47560.1 | MNJ7.15, sodium/dicarboxylate cotransporter, putative, GO:0017153 [sodium:dicarboxylate symporter activity] GO:0006835 [dicarboxylic acid transport] GO:0006814 [sodium ion transport] | Conserved collinear gene       |
| 31500 | 32500 | E=8.8e-73  | At5g47560.1 | MNJ7.15, sodium/dicarboxylate cotransporter, putative, GO:0017153 [sodium:dicarboxylate symporter activity] GO:0006835 [dicarboxylic acid transport] GO:0006814 [sodium ion transport] | Conserved collinear gene       |
| 32000 | 33000 | E=4.8e-39  | At5g47560.1 | MNJ7.15, sodium/dicarboxylate cotransporter, putative, GO:0017153 [sodium:dicarboxylate symporter activity] GO:0006835 [dicarboxylic acid transport] GO:0006814 [sodium ion transport] | Conserved collinear gene       |
| 34500 | 35500 | E=2.2e-11  | At5g47560.1 | MNJ7.15, sodium/dicarboxylate cotransporter, putative, GO:0017153 [sodium:dicarboxylate symporter activity] GO:0006835 [dicarboxylic acid transport] GO:0006814 [sodium ion transport] | annotation error               |
| 35000 | 36000 | E=2.5e-95  | At5g47560.1 | MNJ7.15, sodium/dicarboxylate cotransporter, putative, GO:0017153 [sodium:dicarboxylate symporter activity] GO:0006835 [dicarboxylic acid transport] GO:0006814 [sodium ion transport] | annotation error               |
| 35500 | 36500 | E=2.3e-160 | At5g47560.1 | MNJ7.15, sodium/dicarboxylate cotransporter, putative, GO:0017153 [sodium:dicarboxylate symporter activity] GO:0006835 [dicarboxylic acid transport] GO:0006814 [sodium ion transport] | annotation error               |
| 36000 | 37000 | E=2.8e-91  | At5g47560.1 | MNJ7.15, sodium/dicarboxylate cotransporter, putative, GO:0017153 [sodium:dicarboxylate symporter activity] GO:0006835 [dicarboxylic acid transport] GO:0006814 [sodium ion transport] | annotation error               |
| 38000 | 39000 | E=9.0e-    | At5g47550.1 | MNJ7.14, cysteine protease inhibitor, putative / cystatin, putative,                                                                                                                   | Conserved                      |



|       |       |         |             |                                                                      |                |
|-------|-------|---------|-------------|----------------------------------------------------------------------|----------------|
|       |       | 12      |             | GO:0004869 [cysteine protease inhibitor activity]                    | collinear gene |
|       |       | E=2.5e- |             | MNJ7.14, cysteine protease inhibitor, putative / cystatin, putative, | Conserved      |
| 38500 | 39500 | 29      | At5g47550.1 | GO:0004869 [cysteine protease inhibitor activity]                    | collinear gene |
|       |       | E=3.0e- |             | MNJ7.14, cysteine protease inhibitor, putative / cystatin, putative, | Conserved      |
| 39000 | 40000 | 11      | At5g47550.1 | GO:0004869 [cysteine protease inhibitor activity]                    | collinear gene |
|       |       | E=6.2e- |             | MMF24.1, hypothetical protein, GO:0005554 [molecular_function        | Predicted      |
| 40500 | 41500 | 50      | At3g29265.1 | unknown]                                                             | transposon     |
|       |       | E=5.6e- |             | MMF24.1, hypothetical protein, GO:0005554 [molecular_function        | Predicted      |
| 41000 | 42000 | 29      | At3g29265.1 | unknown]                                                             | transposon     |
|       |       | E=1.0e- |             | F10A2.6, hypothetical protein, GO:0005554 [molecular_function        | Predicted      |
| 44500 | 45500 | 06      | At4g07666.1 | unknown]                                                             | transposon     |
|       |       | E=1.0e- |             | F10A2.6, hypothetical protein, GO:0005554 [molecular_function        | Predicted      |
| 45000 | 46000 | 06      | At4g07666.1 | unknown]                                                             | transposon     |
|       |       | E=2.7e- |             | MNJ7.13, Mo25 family protein, GO:0005554 [molecular_function         | Conserved      |
| 46500 | 47500 | 07      | At5g47540.1 | unknown]                                                             | collinear gene |
|       |       | E=3.3e- |             | MNJ7.13, Mo25 family protein, GO:0005554 [molecular_function         | Conserved      |
| 47000 | 48000 | 59      | At5g47540.1 | unknown]                                                             | collinear gene |
|       |       | E=1.0e- |             | MNJ7.13, Mo25 family protein, GO:0005554 [molecular_function         | Conserved      |
| 47500 | 48500 | 66      | At5g47540.1 | unknown]                                                             | collinear gene |
|       |       | E=7.0e- |             | MNJ7.13, Mo25 family protein, GO:0005554 [molecular_function         | Conserved      |
| 48000 | 49000 | 37      | At5g47540.1 | unknown]                                                             | collinear gene |
|       |       | E=1.8e- |             | MNJ7.13, Mo25 family protein, GO:0005554 [molecular_function         | Conserved      |
| 48500 | 49500 | 30      | At5g47540.1 | unknown]                                                             | collinear gene |
|       |       | E=5.7e- |             | MNJ7.13, Mo25 family protein, GO:0005554 [molecular_function         | Conserved      |
| 49000 | 50000 | 16      | At5g47540.1 | unknown]                                                             | collinear gene |
|       |       | E=3.7e- |             | MNJ7.11, Ras-related GTP-binding protein, putative, GO:0005525       | Conserved      |
| 51000 | 52000 | 59      | At5g47520.1 | [GTP binding]                                                        | collinear gene |
|       |       | E=1.4e- |             | MNJ7.11, Ras-related GTP-binding protein, putative, GO:0005525       | Conserved      |
| 51500 | 52500 | 113     | At5g47520.1 | [GTP binding]                                                        | collinear gene |
|       |       | E=6.2e- |             | MNJ7.11, Ras-related GTP-binding protein, putative, GO:0005525       | Conserved      |
| 52000 | 53000 | 52      | At5g47520.1 | [GTP binding]                                                        | collinear gene |
|       |       | E=2.1e- |             | MNJ7.10, SEC14 cytosolic factor family protein / phosphoglyceride    | Conserved      |
| 52500 | 53500 | 09      | At5g47510.1 | transfer family protein, GO:0006810 [transport] GO:0008372           | collinear gene |
|       |       | E=8.2e- |             | [cellular_component unknown] GO:0005215 [transporter activity]       |                |
|       |       | E=8.2e- |             | MNJ7.10, SEC14 cytosolic factor family protein / phosphoglyceride    | Conserved      |
| 53000 | 54000 | 40      | At5g47510.1 | transfer family protein, GO:0006810 [transport] GO:0008372           | collinear gene |
|       |       | E=8.6e- |             | [cellular_component unknown] GO:0005215 [transporter activity]       |                |
| 53500 | 54500 | 77      | At5g47510.1 | MNJ7.10, SEC14 cytosolic factor family protein / phosphoglyceride    | Conserved      |
|       |       | E=8.8e- |             | transfer family protein, GO:0006810 [transport] GO:0008372           | collinear gene |
| 54000 | 55000 |         | At5g47510.1 | [cellular_component unknown] GO:0005215 [transporter activity]       | Conserved      |
|       |       |         |             | MNJ7.10, SEC14 cytosolic factor family protein / phosphoglyceride    |                |

|       |       |            |             |                                                                                                                                                                                                                                                                                                                       |                                |
|-------|-------|------------|-------------|-----------------------------------------------------------------------------------------------------------------------------------------------------------------------------------------------------------------------------------------------------------------------------------------------------------------------|--------------------------------|
|       |       | 59         |             | transfer family protein, GO:0006810 [transport] GO:0008372 [cellular_component unknown] GO:0005215 [transporter activity] MNJ7.10, SEC14 cytosolic factor family protein / phosphoglyceride transfer family protein, GO:0006810 [transport] GO:0008372 [cellular_component unknown] GO:0005215 [transporter activity] | collinear gene                 |
| 54500 | 55500 | E=1.8e-20  | At5g47510.1 |                                                                                                                                                                                                                                                                                                                       | Conserved collinear gene       |
| 55500 | 56500 | E=3.8e-16  | At1g33710.1 | F14M2.21, expressed protein, GO:0005554 [molecular_function unknown]                                                                                                                                                                                                                                                  | Inserted fragment within model |
| 56000 | 57000 | E=1.1e-30  | At1g33710.1 | F14M2.21, expressed protein, GO:0005554 [molecular_function unknown]                                                                                                                                                                                                                                                  | Inserted fragment within model |
| 56500 | 57500 | E=2.9e-12  | At5g52065.1 | MSG15.16, hypothetical protein, GO:0005554 [molecular_function unknown]                                                                                                                                                                                                                                               | Inserted fragment within model |
| 57000 | 58000 | E=2.9e-12  | At5g52065.1 | MSG15.16, hypothetical protein, GO:0005554 [molecular_function unknown]                                                                                                                                                                                                                                               | Inserted fragment within model |
| 65500 | 66500 | E=3.6e-34  | At3g29265.1 | MMF24.1, hypothetical protein, GO:0005554 [molecular_function unknown]                                                                                                                                                                                                                                                | Predicted transposon           |
| 66000 | 67000 | E=2.9e-47  | At3g29265.1 | MMF24.1, hypothetical protein, GO:0005554 [molecular_function unknown]                                                                                                                                                                                                                                                | Predicted transposon           |
| 69500 | 70500 | E=7.9e-31  | At5g47500.1 | MNJ7.9, pectinesterase family protein, GO:0030599 [pectinesterase activity] GO:0009505 [cell wall (sensu Magnoliophyta)]                                                                                                                                                                                              | Conserved collinear gene       |
| 70000 | 71000 | E=2.5e-72  | At5g47500.1 | MNJ7.9, pectinesterase family protein, GO:0030599 [pectinesterase activity] GO:0009505 [cell wall (sensu Magnoliophyta)]                                                                                                                                                                                              | Conserved collinear gene       |
| 70500 | 71500 | E=2.8e-121 | At5g47500.1 | MNJ7.9, pectinesterase family protein, GO:0030599 [pectinesterase activity] GO:0009505 [cell wall (sensu Magnoliophyta)]                                                                                                                                                                                              | Conserved collinear gene       |
| 71000 | 72000 | E=6.9e-71  | At5g47500.1 | MNJ7.9, pectinesterase family protein, GO:0030599 [pectinesterase activity] GO:0009505 [cell wall (sensu Magnoliophyta)]                                                                                                                                                                                              | Conserved collinear gene       |
| 73000 | 74000 | E=1.9e-07  | At4g23160.1 | F21P8.50, protein kinase family protein, GO:0016301 [kinase activity]                                                                                                                                                                                                                                                 | Predicted transposon           |
| 76000 | 77000 | E=1.2e-32  | At5g33303.1 | F19N2.6, hypothetical protein, GO:0005554 [molecular_function unknown]                                                                                                                                                                                                                                                | Predicted transposon           |
| 76500 | 77500 | E=1.4e-17  | At2g04135.1 | F3L12.19, hypothetical protein, GO:0005554 [molecular_function unknown]                                                                                                                                                                                                                                               | Predicted transposon           |
| 81000 | 82000 | E=9.2e-45  | At5g32482.1 | T15F17.6, zinc knuckle (CCHC-type) family protein, GO:0003676 [nucleic acid binding]                                                                                                                                                                                                                                  | Predicted transposon           |
| 81500 | 82500 | E=2.9e-37  | At5g32482.1 | T15F17.6, zinc knuckle (CCHC-type) family protein, GO:0003676 [nucleic acid binding]                                                                                                                                                                                                                                  | Predicted transposon           |
| 86500 | 87500 | E=2.5e-12  | At3g21865.1 | MSD21.24, expressed protein, GO:0005554 [molecular_function unknown]                                                                                                                                                                                                                                                  | Inserted fragment              |

|       |       |            |             |                                                                                                                                                                |                                                                                      |
|-------|-------|------------|-------------|----------------------------------------------------------------------------------------------------------------------------------------------------------------|--------------------------------------------------------------------------------------|
| 87000 | 88000 | E=3.9e-06  | At3g21865.1 | MSD21.24, expressed protein, GO:0005554 [molecular_function unknown]                                                                                           | outside gene models<br>Inserted fragment<br>outside gene models<br>Inserted fragment |
| 88500 | 89500 | E=1.2e-23  | At5g47070.1 | MQD22.21, protein kinase, putative, GO:0016301 [kinase activity]                                                                                               | within model<br>Inserted fragment                                                    |
| 89000 | 90000 | E=1.7e-25  | At5g47070.1 | MQD22.21, protein kinase, putative, GO:0016301 [kinase activity]                                                                                               | within model<br>Inserted fragment                                                    |
| 89500 | 90500 | E=2.6e-07  | At5g47070.1 | MQD22.21, protein kinase, putative, GO:0016301 [kinase activity]                                                                                               | within model<br>Inserted fragment                                                    |
| 90500 | 91500 | E=7.9e-20  | At4g01200.1 | F2N1.36, C2 domain-containing protein, GO:0000004 [biological_process unknown] GO:0008372 [cellular_component unknown] GO:0005554 [molecular_function unknown] | Inserted fragment<br>within model                                                    |
| 91000 | 92000 | E=7.9e-20  | At4g01200.1 | F2N1.36, C2 domain-containing protein, GO:0000004 [biological_process unknown] GO:0008372 [cellular_component unknown] GO:0005554 [molecular_function unknown] | Inserted fragment<br>within model                                                    |
| 91500 | 92500 | E=7.0e-69  | At5g47490.1 | MNJ7.8, expressed protein, GO:0005554 [molecular_function unknown]                                                                                             | Conserved<br>collinear gene                                                          |
| 92000 | 93000 | E=8.8e-119 | At5g47490.1 | MNJ7.8, expressed protein, GO:0005554 [molecular_function unknown]                                                                                             | Conserved<br>collinear gene                                                          |
| 92500 | 93500 | E=1.1e-81  | At5g47490.1 | MNJ7.8, expressed protein, GO:0005554 [molecular_function unknown]                                                                                             | Conserved<br>collinear gene                                                          |
| 93000 | 94000 | E=2.6e-80  | At5g47490.1 | MNJ7.8, expressed protein, GO:0005554 [molecular_function unknown]                                                                                             | Conserved<br>collinear gene                                                          |
| 93500 | 94500 | E=1.1e-59  | At5g47490.1 | MNJ7.8, expressed protein, GO:0005554 [molecular_function unknown]                                                                                             | Conserved<br>collinear gene                                                          |
| 94000 | 95000 | E=1.3e-61  | At5g47490.1 | MNJ7.8, expressed protein, GO:0005554 [molecular_function unknown]                                                                                             | Conserved<br>collinear gene                                                          |
| 94500 | 95500 | E=6.9e-59  | At5g47490.1 | MNJ7.8, expressed protein, GO:0005554 [molecular_function unknown]                                                                                             | Conserved<br>collinear gene                                                          |
| 95000 | 96000 | E=1.7e-78  | At5g47490.1 | MNJ7.8, expressed protein, GO:0005554 [molecular_function unknown]                                                                                             | Conserved<br>collinear gene                                                          |
| 95500 | 96500 | E=3.3e-121 | At5g47480.1 | MNJ7.7, expressed protein, GO:0005554 [molecular_function unknown]                                                                                             | Conserved<br>collinear gene                                                          |
| 96000 | 97000 | E=2.7e-135 | At5g47480.1 | MNJ7.7, expressed protein, GO:0005554 [molecular_function unknown]                                                                                             | Conserved<br>collinear gene                                                          |

|        |        |            |             |                                                                                                                                                                                    |                          |
|--------|--------|------------|-------------|------------------------------------------------------------------------------------------------------------------------------------------------------------------------------------|--------------------------|
| 96500  | 97500  | E=5.9e-93  | At5g47480.1 | MNJ7.7, expressed protein, GO:0005554 [molecular_function unknown]                                                                                                                 | Conserved collinear gene |
| 97000  | 98000  | E=4.5e-52  | At5g47490.1 | MNJ7.8, expressed protein, GO:0005554 [molecular_function unknown]                                                                                                                 | Conserved collinear gene |
| 97500  | 98500  | E=3.1e-09  | At5g47490.1 | MNJ7.8, expressed protein, GO:0005554 [molecular_function unknown]                                                                                                                 | Conserved collinear gene |
| 98000  | 99000  | E=9.4e-47  | At5g47490.1 | MNJ7.8, expressed protein, GO:0005554 [molecular_function unknown]                                                                                                                 | Conserved collinear gene |
| 98500  | 99500  | E=1.4e-54  | At5g47490.1 | MNJ7.8, expressed protein, GO:0005554 [molecular_function unknown]                                                                                                                 | Conserved collinear gene |
| 100000 | 101000 | E=3.8e-24  | At5g47470.1 | MNJ7.6, nodulin MtN21 family protein, GO:0016020 [membrane]<br>GO:0005554 [molecular_function unknown]                                                                             | Conserved collinear gene |
| 100500 | 101500 | E=8.9e-80  | At5g47470.1 | MNJ7.6, nodulin MtN21 family protein, GO:0016020 [membrane]<br>GO:0005554 [molecular_function unknown]                                                                             | Conserved collinear gene |
| 101000 | 102000 | E=1.4e-75  | At5g47470.1 | MNJ7.6, nodulin MtN21 family protein, GO:0016020 [membrane]<br>GO:0005554 [molecular_function unknown]                                                                             | Conserved collinear gene |
| 101500 | 102500 | E=1.6e-60  | At5g47470.1 | MNJ7.6, nodulin MtN21 family protein, GO:0016020 [membrane]<br>GO:0005554 [molecular_function unknown]                                                                             | Conserved collinear gene |
| 102000 | 103000 | E=3.3e-17  | At5g47470.1 | MNJ7.6, nodulin MtN21 family protein, GO:0016020 [membrane]<br>GO:0005554 [molecular_function unknown]                                                                             | Conserved collinear gene |
| 107500 | 108500 | E=8.6e-32  | At5g47460.1 | MNJ7.5, pentatricopeptide (PPR) repeat-containing protein, GO:0000004 [biological_process unknown] GO:0008372 [cellular_component unknown] GO:0005554 [molecular_function unknown] | Conserved collinear gene |
| 108000 | 109000 | E=8.6e-32  | At5g47460.1 | MNJ7.5, pentatricopeptide (PPR) repeat-containing protein, GO:0000004 [biological_process unknown] GO:0008372 [cellular_component unknown] GO:0005554 [molecular_function unknown] | Conserved collinear gene |
| 110000 | 111000 | E=2.6e-79  | At5g47460.1 | MNJ7.5, pentatricopeptide (PPR) repeat-containing protein, GO:0000004 [biological_process unknown] GO:0008372 [cellular_component unknown] GO:0005554 [molecular_function unknown] | Conserved collinear gene |
| 110500 | 111500 | E=1.8e-154 | At5g47460.1 | MNJ7.5, pentatricopeptide (PPR) repeat-containing protein, GO:0000004 [biological_process unknown] GO:0008372 [cellular_component unknown] GO:0005554 [molecular_function unknown] | Conserved collinear gene |
| 111000 | 112000 | E=4.1e-125 | At5g47460.1 | MNJ7.5, pentatricopeptide (PPR) repeat-containing protein, GO:0000004 [biological_process unknown] GO:0008372 [cellular_component unknown] GO:0005554 [molecular_function unknown] | Conserved collinear gene |
| 111500 | 112500 | E=1.7e-    | At5g47460.1 | MNJ7.5, pentatricopeptide (PPR) repeat-containing protein,                                                                                                                         | Conserved                |

|        |        |            |             |                                                                                                                                                                                                                                                                |                                |
|--------|--------|------------|-------------|----------------------------------------------------------------------------------------------------------------------------------------------------------------------------------------------------------------------------------------------------------------|--------------------------------|
|        |        | 95         |             | GO:0000004 [biological_process unknown] GO:0008372 [cellular_component unknown] GO:0005554 [molecular_function unknown]                                                                                                                                        | collinear gene                 |
| 112500 | 113500 | E=2.8e-29  | At5g47455.5 | MNJ7.31, expressed protein, GO:0005554 [molecular_function unknown]                                                                                                                                                                                            | Conserved collinear gene       |
| 113000 | 114000 | E=7.5e-44  | At5g47455.5 | MNJ7.31, expressed protein, GO:0005554 [molecular_function unknown]                                                                                                                                                                                            | Conserved collinear gene       |
| 113500 | 114500 | E=1.3e-10  | At5g47455.4 | MNJ7.31, expressed protein, GO:0005554 [molecular_function unknown]                                                                                                                                                                                            | Conserved collinear gene       |
| 115000 | 116000 | E=1.0e-13  | At2g05950.1 | T6P5.15, hypothetical protein, GO:0005554 [molecular_function unknown]                                                                                                                                                                                         | Inserted fragment within model |
| 115500 | 116500 | E=8.4e-13  | At2g05950.1 | T6P5.15, hypothetical protein, GO:0005554 [molecular_function unknown]                                                                                                                                                                                         | Inserted fragment within model |
| 121500 | 122500 | E=1.6e-48  | At5g47450.1 | MQL5.31, major intrinsic family protein / MIP family protein, GO:0016020 [membrane] GO:0006810 [transport] GO:0015250 [water channel activity]                                                                                                                 | Conserved collinear gene       |
| 122000 | 123000 | E=3.9e-57  | At5g47450.1 | MQL5.31, major intrinsic family protein / MIP family protein, GO:0016020 [membrane] GO:0006810 [transport] GO:0015250 [water channel activity]                                                                                                                 | Conserved collinear gene       |
| 123000 | 124000 | E=8.6e-62  | At5g47450.1 | MQL5.31, major intrinsic family protein / MIP family protein, GO:0016020 [membrane] GO:0006810 [transport] GO:0015250 [water channel activity]                                                                                                                 | Conserved collinear gene       |
| 123500 | 124500 | E=8.6e-62  | At5g47450.1 | MQL5.31, major intrinsic family protein / MIP family protein, GO:0016020 [membrane] GO:0006810 [transport] GO:0015250 [water channel activity]                                                                                                                 | Conserved collinear gene       |
| 127500 | 128500 | E=4.1e-23  | At5g47440.1 | MNJ7.2, expressed protein, GO:0005554 [molecular_function unknown]                                                                                                                                                                                             | Conserved collinear gene       |
| 128000 | 129000 | E=2.9e-94  | At5g47440.1 | MNJ7.2, expressed protein, GO:0005554 [molecular_function unknown]                                                                                                                                                                                             | Conserved collinear gene       |
| 128500 | 129500 | E=4.3e-116 | At5g47440.1 | MNJ7.2, expressed protein, GO:0005554 [molecular_function unknown]                                                                                                                                                                                             | Conserved collinear gene       |
| 129000 | 130000 | E=1.9e-89  | At5g47440.1 | MNJ7.2, expressed protein, GO:0005554 [molecular_function unknown]                                                                                                                                                                                             | Conserved collinear gene       |
| 129500 | 130500 | E=3.6e-53  | At5g47435.2 | MNJ7.1, formyltetrahydrofolate deformylase, putative, GO:0009152 [purine ribonucleotide biosynthesis] GO:0008864 [formyltetrahydrofolate deformylase activity] GO:0009058 [biosynthesis] GO:0016742 [hydroxymethyl-, formyl- and related transferase activity] | Conserved collinear gene       |
| 130000 | 131000 | E=1.6e-87  | At5g47435.2 | MNJ7.1, formyltetrahydrofolate deformylase, putative, GO:0009152 [purine ribonucleotide biosynthesis] GO:0008864                                                                                                                                               | Conserved collinear gene       |

|        |        |               |             |                                                                                                                                                                                                                                                                         |                                                     |
|--------|--------|---------------|-------------|-------------------------------------------------------------------------------------------------------------------------------------------------------------------------------------------------------------------------------------------------------------------------|-----------------------------------------------------|
|        |        |               |             | [formyltetrahydrofolate deformylase activity] GO:0009058 [biosynthesis]<br>GO:0016742 [hydroxymethyl-, formyl- and related transferase activity]<br>MNJ7.1, formyltetrahydrofolate deformylase, putative, GO:0009152<br>[purine ribonucleotide biosynthesis] GO:0008864 |                                                     |
| 130500 | 131500 | E=2.2e-<br>62 | At5g47435.2 | [formyltetrahydrofolate deformylase activity] GO:0009058 [biosynthesis]<br>GO:0016742 [hydroxymethyl-, formyl- and related transferase activity]<br>MNJ7.1, formyltetrahydrofolate deformylase, putative, GO:0009152<br>[purine ribonucleotide biosynthesis] GO:0008864 | Conserved<br>collinear gene                         |
| 131000 | 132000 | E=2.6e-<br>64 | At5g47435.2 | [formyltetrahydrofolate deformylase activity] GO:0009058 [biosynthesis]<br>GO:0016742 [hydroxymethyl-, formyl- and related transferase activity]                                                                                                                        | Conserved<br>collinear gene<br>Inserted<br>fragment |
| 131500 | 132500 | E=3.0e-<br>07 | At2g31700.1 | T9H9.22, hypothetical protein, GO:0005554 [molecular_function<br>unknown]                                                                                                                                                                                               | outside gene<br>models<br>Inserted<br>fragment      |
| 132000 | 133000 | E=3.0e-<br>07 | At2g31700.1 | T9H9.22, hypothetical protein, GO:0005554 [molecular_function<br>unknown]                                                                                                                                                                                               | outside gene<br>models                              |
| 132500 | 133500 | E=2.2e-<br>18 | At5g36200.1 | MAB16.1, F-box family protein, GO:0005554 [molecular_function<br>unknown]                                                                                                                                                                                               | Conserved<br>collinear gene                         |
| 133000 | 134000 | E=5.5e-<br>17 | At5g36200.1 | MAB16.1, F-box family protein, GO:0005554 [molecular_function<br>unknown]                                                                                                                                                                                               | Conserved<br>collinear gene                         |
| 133500 | 134500 | E=2.8e-<br>51 | At5g47420.1 | MQL5.28, expressed protein, GO:0000004 [biological_process<br>unknown] GO:0008372 [cellular_component unknown] GO:0005554<br>[molecular_function unknown]                                                                                                               | Conserved<br>collinear gene                         |
| 134000 | 135000 | E=1.3e-<br>56 | At5g47420.1 | MQL5.28, expressed protein, GO:0000004 [biological_process<br>unknown] GO:0008372 [cellular_component unknown] GO:0005554<br>[molecular_function unknown]                                                                                                               | Conserved<br>collinear gene                         |
| 134500 | 135500 | E=3.2e-<br>46 | At4g17420.1 | FCAALL.389, expressed protein, GO:0000004 [biological_process<br>unknown] GO:0008372 [cellular_component unknown] GO:0005554<br>[molecular_function unknown]                                                                                                            | Conserved<br>collinear gene                         |
| 135000 | 136000 | E=2.5e-<br>40 | At5g47420.1 | MQL5.28, expressed protein, GO:0000004 [biological_process<br>unknown] GO:0008372 [cellular_component unknown] GO:0005554<br>[molecular_function unknown]                                                                                                               | Conserved<br>collinear gene                         |
| 135500 | 136500 | E=5.3e-<br>37 | At5g47410.1 | MQL5.27, hypothetical protein, GO:0005554 [molecular_function<br>unknown]                                                                                                                                                                                               | Conserved<br>collinear gene                         |
| 136000 | 137000 | E=1.6e-<br>54 | At5g47410.1 | MQL5.27, hypothetical protein, GO:0005554 [molecular_function<br>unknown]                                                                                                                                                                                               | Conserved<br>collinear gene                         |
| 136500 | 137500 | E=3.5e-<br>20 | At5g47400.1 | MQL5.26, hypothetical protein, GO:0005554 [molecular_function<br>unknown]                                                                                                                                                                                               | Conserved<br>collinear gene                         |
| 137000 | 138000 | E=1.6e-<br>20 | At5g47400.1 | MQL5.26, hypothetical protein, GO:0005554 [molecular_function<br>unknown]                                                                                                                                                                                               | Conserved                                           |

|        |        |            |             |                                                                                                                                                                                                                                                                                 |                                       |
|--------|--------|------------|-------------|---------------------------------------------------------------------------------------------------------------------------------------------------------------------------------------------------------------------------------------------------------------------------------|---------------------------------------|
|        |        | 68         |             | unknown]                                                                                                                                                                                                                                                                        | collinear gene                        |
| 137500 | 138500 | E=8.5e-142 | At5g47400.1 | MQL5.26, hypothetical protein, GO:0005554 [molecular_function unknown]                                                                                                                                                                                                          | Conserved collinear gene              |
| 138000 | 139000 | E=7.5e-174 | At5g47400.1 | MQL5.26, hypothetical protein, GO:0005554 [molecular_function unknown]                                                                                                                                                                                                          | Conserved collinear gene              |
| 138500 | 139500 | E=2.5e-122 | At5g47400.1 | MQL5.26, hypothetical protein, GO:0005554 [molecular_function unknown]                                                                                                                                                                                                          | Conserved collinear gene              |
| 139000 | 140000 | E=1.6e-40  | At5g47400.1 | MQL5.26, hypothetical protein, GO:0005554 [molecular_function unknown]                                                                                                                                                                                                          | Conserved collinear gene              |
| 151000 | 152000 | E=3.5e-41  | At5g47370.1 | MQL5.23, homeobox-leucine zipper protein 2 (HAT2) / HD-ZIP protein 2, GO:0009826 [cell elongation] GO:0009733 [response to auxin stimulus] GO:0005634 [nucleus] GO:0003677 [DNA binding] GO:0006355 [regulation of transcription, DNA-dependent] GO:0009734 [auxin mediated si] | Conserved collinear gene              |
| 151500 | 152500 | E=1.1e-87  | At5g47370.1 | MQL5.23, homeobox-leucine zipper protein 2 (HAT2) / HD-ZIP protein 2, GO:0009826 [cell elongation] GO:0009733 [response to auxin stimulus] GO:0005634 [nucleus] GO:0003677 [DNA binding] GO:0006355 [regulation of transcription, DNA-dependent] GO:0009734 [auxin mediated si] | Conserved collinear gene              |
| 152000 | 153000 | E=1.7e-78  | At5g47370.1 | MQL5.23, homeobox-leucine zipper protein 2 (HAT2) / HD-ZIP protein 2, GO:0009826 [cell elongation] GO:0009733 [response to auxin stimulus] GO:0005634 [nucleus] GO:0003677 [DNA binding] GO:0006355 [regulation of transcription, DNA-dependent] GO:0009734 [auxin mediated si] | Conserved collinear gene              |
| 152500 | 153500 | E=1.4e-22  | At5g47370.1 | MQL5.23, homeobox-leucine zipper protein 2 (HAT2) / HD-ZIP protein 2, GO:0009826 [cell elongation] GO:0009733 [response to auxin stimulus] GO:0005634 [nucleus] GO:0003677 [DNA binding] GO:0006355 [regulation of transcription, DNA-dependent] GO:0009734 [auxin mediated si] | Conserved collinear gene              |
| 153000 | 154000 | E=2.3e-08  | At5g20920.1 | F22D1.90, eukaryotic translation initiation factor 2 subunit 2, putative / eIF-2-beta, putative, GO:0006413 [translational initiation] GO:0003743 [translation initiation factor activity]                                                                                      | Inserted fragment outside gene models |
| 153500 | 154500 | E=3.8e-12  | At5g20920.1 | F22D1.90, eukaryotic translation initiation factor 2 subunit 2, putative / eIF-2-beta, putative, GO:0006413 [translational initiation] GO:0003743 [translation initiation factor activity]                                                                                      | Inserted fragment outside gene models |
| 161000 | 162000 | E=8.6e-63  | At5g47360.1 | MQL5.22, pentatricopeptide (PPR) repeat-containing protein, GO:0000004 [biological_process unknown] GO:0008372 [cellular_component unknown] GO:0005554 [molecular_function unknown]                                                                                             | Conserved collinear gene              |

|        |        |            |             |                                                                                                                                                                                     |                                |
|--------|--------|------------|-------------|-------------------------------------------------------------------------------------------------------------------------------------------------------------------------------------|--------------------------------|
| 161500 | 162500 | E=1.0e-146 | At5g47360.1 | MQL5.22, pentatricopeptide (PPR) repeat-containing protein, GO:0000004 [biological_process unknown] GO:0008372 [cellular_component unknown] GO:0005554 [molecular_function unknown] | Conserved collinear gene       |
| 162000 | 163000 | E=4.7e-165 | At5g47360.1 | MQL5.22, pentatricopeptide (PPR) repeat-containing protein, GO:0000004 [biological_process unknown] GO:0008372 [cellular_component unknown] GO:0005554 [molecular_function unknown] | Conserved collinear gene       |
| 162500 | 163500 | E=2.6e-81  | At5g47360.1 | MQL5.22, pentatricopeptide (PPR) repeat-containing protein, GO:0000004 [biological_process unknown] GO:0008372 [cellular_component unknown] GO:0005554 [molecular_function unknown] | Conserved collinear gene       |
| 163500 | 164500 | E=1.0e-10  | At2g01560.1 | F219.18, hypothetical protein, GO:0000004 [biological_process unknown] GO:0008372 [cellular_component unknown] GO:0005554 [molecular_function unknown]                              | Inserted fragment within model |
| 165000 | 166000 | E=2.5e-06  | At1g67020.1 | F1O19.7, hypothetical protein, GO:0005554 [molecular_function unknown]                                                                                                              | Predicted transposon           |
| 165500 | 166500 | E=1.3e-06  | At1g67020.1 | F1O19.7, hypothetical protein, GO:0005554 [molecular_function unknown]                                                                                                              | Predicted transposon           |
| 170500 | 171500 | E=1.7e-29  | At5g47330.1 | MQL5.19, palmitoyl protein thioesterase family protein, GO:0008474 [palmitoyl-(protein) hydrolase activity]                                                                         | annotation error               |
| 171000 | 172000 | E=1.1e-57  | At5g47350.1 | MQL5.21, palmitoyl protein thioesterase family protein, GO:0008474 [palmitoyl-(protein) hydrolase activity]                                                                         | Conserved collinear gene       |
| 171500 | 172500 | E=8.6e-32  | At5g47340.1 | MQL5.20, palmitoyl protein thioesterase family protein, GO:0008474 [palmitoyl-(protein) hydrolase activity]                                                                         | Conserved collinear gene       |
| 172000 | 173000 | E=4.1e-62  | At5g47330.1 | MQL5.19, palmitoyl protein thioesterase family protein, GO:0008474 [palmitoyl-(protein) hydrolase activity]                                                                         | Conserved collinear gene       |
| 172500 | 173500 | E=2.9e-41  | At5g47330.1 | MQL5.19, palmitoyl protein thioesterase family protein, GO:0008474 [palmitoyl-(protein) hydrolase activity]                                                                         | Conserved collinear gene       |
| 177500 | 178500 | E=2.3e-27  | At5g47310.1 | MQL5.17, expressed protein, GO:0005554 [molecular_function unknown]                                                                                                                 | Conserved collinear gene       |
| 178000 | 179000 | E=1.2e-79  | At5g47310.1 | MQL5.17, expressed protein, GO:0005554 [molecular_function unknown]                                                                                                                 | Conserved collinear gene       |
| 178500 | 179500 | E=2.1e-80  | At5g47310.1 | MQL5.17, expressed protein, GO:0005554 [molecular_function unknown]                                                                                                                 | Conserved collinear gene       |
| 179000 | 180000 | E=8.6e-25  | At5g47310.1 | MQL5.17, expressed protein, GO:0005554 [molecular_function unknown]                                                                                                                 | Conserved collinear gene       |
| 183000 | 184000 | E=1.7e-09  | At2g05950.1 | T6P5.15, hypothetical protein, GO:0005554 [molecular_function unknown]                                                                                                              | Predicted transposon           |
| 183500 | 184500 | E=3.9e-13  | At2g05950.1 | T6P5.15, hypothetical protein, GO:0005554 [molecular_function unknown]                                                                                                              | Predicted transposon           |



|        |        |           |             |                                                                                                                                                         |                                       |
|--------|--------|-----------|-------------|---------------------------------------------------------------------------------------------------------------------------------------------------------|---------------------------------------|
| 189500 | 190500 | E=1.6e-08 | At2g24780.1 | F27C12.30, hypothetical protein, GO:0005554 [molecular_function unknown]                                                                                | Inserted fragment outside gene models |
| 190000 | 191000 | E=1.6e-08 | At2g24780.1 | F27C12.30, hypothetical protein, GO:0005554 [molecular_function unknown]                                                                                | Inserted fragment outside gene models |
| 196500 | 197500 | E=1.3e-11 | At2g38255.1 | F16M14.24, expressed protein, GO:0000004 [biological_process unknown] GO:0008372 [cellular_component unknown] GO:0005554 [molecular_function unknown]   | Predicted transposon                  |
| 197000 | 198000 | E=9.4e-12 | At2g38255.1 | F16M14.24, expressed protein, GO:0000004 [biological_process unknown] GO:0008372 [cellular_component unknown] GO:0005554 [molecular_function unknown]   | Predicted transposon                  |
| 198500 | 199500 | E=5.7e-09 | At5g32482.1 | T15F17.6, zinc knuckle (CCHC-type) family protein, GO:0003676 [nucleic acid binding]                                                                    | Inserted fragment within model        |
| 199000 | 200000 | E=9.8e-49 | At5g32482.1 | T15F17.6, zinc knuckle (CCHC-type) family protein, GO:0003676 [nucleic acid binding]                                                                    | Predicted transposon                  |
| 199500 | 200500 | E=2.9e-38 | At5g32482.1 | T15F17.6, zinc knuckle (CCHC-type) family protein, GO:0003676 [nucleic acid binding]                                                                    | Predicted transposon                  |
| 204000 | 205000 | E=9.6e-25 | At2g38255.1 | F16M14.24, expressed protein, GO:0000004 [biological_process unknown] GO:0008372 [cellular_component unknown] GO:0005554 [molecular_function unknown]   | Predicted transposon                  |
| 204500 | 205500 | E=9.6e-25 | At2g38255.1 | F16M14.24, expressed protein, GO:0000004 [biological_process unknown] GO:0008372 [cellular_component unknown] GO:0005554 [molecular_function unknown]   | Predicted transposon                  |
| 205500 | 206500 | E=6.9e-09 | At2g38255.1 | F16M14.24, expressed protein, GO:0000004 [biological_process unknown] GO:0008372 [cellular_component unknown] GO:0005554 [molecular_function unknown]   | Predicted transposon                  |
| 206000 | 207000 | E=1.3e-24 | At2g27320.1 | F12K2.10, hypothetical protein, GO:0000004 [biological_process unknown] GO:0008372 [cellular_component unknown] GO:0005554 [molecular_function unknown] | Inserted fragment within model        |
| 206500 | 207500 | E=5.3e-40 | At2g27320.1 | F12K2.10, hypothetical protein, GO:0000004 [biological_process unknown] GO:0008372 [cellular_component unknown] GO:0005554 [molecular_function unknown] | Inserted fragment within model        |
| 207000 | 208000 | E=4.4e-43 | At2g38255.1 | F16M14.24, expressed protein, GO:0000004 [biological_process unknown] GO:0008372 [cellular_component unknown] GO:0005554 [molecular_function unknown]   | Inserted fragment outside gene models |
| 207500 | 208500 | E=2.8e-   | At2g38255.1 | F16M14.24, expressed protein, GO:0000004 [biological_process                                                                                            | Inserted                              |

|        |        |            |             |                                                                                                                                                                                                           |                                       |
|--------|--------|------------|-------------|-----------------------------------------------------------------------------------------------------------------------------------------------------------------------------------------------------------|---------------------------------------|
|        |        | 26         |             | unknown] GO:0008372 [cellular_component unknown] GO:0005554 [molecular_function unknown]                                                                                                                  | fragment outside gene models          |
| 208500 | 209500 | E=4.1e-50  | At3g51770.1 | ATEM1.2, tetratricopeptide repeat (TPR)-containing protein, GO:0000004 [biological_process unknown] GO:0008372 [cellular_component unknown] GO:0005554 [molecular_function unknown]                       | Inserted fragment within model        |
| 209000 | 210000 | E=9.7e-101 | At3g51770.1 | ATEM1.2, tetratricopeptide repeat (TPR)-containing protein, GO:0000004 [biological_process unknown] GO:0008372 [cellular_component unknown] GO:0005554 [molecular_function unknown]                       | Inserted fragment within model        |
| 209500 | 210500 | E=9.5e-57  | At3g51770.1 | ATEM1.2, tetratricopeptide repeat (TPR)-containing protein, GO:0000004 [biological_process unknown] GO:0008372 [cellular_component unknown] GO:0005554 [molecular_function unknown]                       | Inserted fragment within model        |
| 212000 | 213000 | E=2.6e-07  | At2g04600.1 | F7D11.4, hypothetical protein, GO:0005554 [molecular_function unknown]                                                                                                                                    | Inserted fragment outside gene models |
| 212500 | 213500 | E=1.3e-07  | At3g29450.1 | MUO10.19, hypothetical protein, GO:0005554 [molecular_function unknown]                                                                                                                                   | Inserted fragment within model        |
| 213000 | 214000 | E=1.3e-07  | At3g29450.1 | MUO10.19, hypothetical protein, GO:0005554 [molecular_function unknown]                                                                                                                                   | Inserted fragment within model        |
| 219500 | 220500 | E=2.5e-14  | At1g02230.1 | T7I23.19, no apical meristem (NAM) family protein, GO:0007275 [development] GO:0005554 [molecular_function unknown] GO:0003700 [transcription factor activity]                                            | Predicted transposon                  |
| 220000 | 221000 | E=5.9e-20  | At5g47225.1 | MQL5.8, hypothetical protein, GO:0005554 [molecular_function unknown]                                                                                                                                     | Predicted transposon                  |
| 220500 | 221500 | E=4.9e-09  | At4g29090.1 | F25O24.5, reverse transcriptase, putative / RNA-dependent DNA polymerase, putative, GO:0003723 [RNA binding] GO:0003964 [RNA-directed DNA polymerase activity] GO:0006278 [RNA dependent DNA replication] | Predicted transposon                  |
| 221000 | 222000 | E=1.1e-11  | At4g29090.1 | F25O24.5, reverse transcriptase, putative / RNA-dependent DNA polymerase, putative, GO:0003723 [RNA binding] GO:0003964 [RNA-directed DNA polymerase activity] GO:0006278 [RNA dependent DNA replication] | Predicted transposon                  |
| 231500 | 232500 | E=3.4e-11  | At2g05950.1 | T6P5.15, hypothetical protein, GO:0005554 [molecular_function unknown]                                                                                                                                    | Predicted transposon                  |
| 232000 | 233000 | E=3.4e-11  | At2g05950.1 | T6P5.15, hypothetical protein, GO:0005554 [molecular_function unknown]                                                                                                                                    | Predicted                             |

|        |        |           |             |                                                                                                                                                                    |  |                                                |
|--------|--------|-----------|-------------|--------------------------------------------------------------------------------------------------------------------------------------------------------------------|--|------------------------------------------------|
|        |        | 11        |             | unknown]                                                                                                                                                           |  | transposon                                     |
| 241000 | 242000 | E=1.0e-17 | At3g52680.1 | F3C22.80, F-box family protein, GO:0005554 [molecular_function unknown]                                                                                            |  | Inserted<br>fragment<br>within model           |
| 241500 | 242500 | E=1.0e-17 | At3g52680.1 | F3C22.80, F-box family protein, GO:0005554 [molecular_function unknown]                                                                                            |  | Inserted<br>fragment<br>within model           |
| 242000 | 243000 | E=1.1e-35 | At5g47240.1 | MQL5.10, MutT/nudix family protein, GO:0016787 [hydrolase activity]                                                                                                |  | Conserved<br>collinear gene                    |
| 242500 | 243500 | E=4.9e-63 | At5g47240.1 | MQL5.10, MutT/nudix family protein, GO:0016787 [hydrolase activity]                                                                                                |  | Conserved<br>collinear gene                    |
| 243000 | 244000 | E=1.3e-83 | At5g47240.1 | MQL5.10, MutT/nudix family protein, GO:0016787 [hydrolase activity]                                                                                                |  | Conserved<br>collinear gene                    |
| 243500 | 244500 | E=2.3e-44 | At5g47240.1 | MQL5.10, MutT/nudix family protein, GO:0016787 [hydrolase activity]                                                                                                |  | Conserved<br>collinear gene                    |
| 244000 | 245000 | E=1.8e-13 | At5g47240.1 | MQL5.10, MutT/nudix family protein, GO:0016787 [hydrolase activity]                                                                                                |  | Conserved<br>collinear gene                    |
| 250500 | 251500 | E=6.0e-47 | At3g29265.1 | MMF24.1, hypothetical protein, GO:0005554 [molecular_function unknown]                                                                                             |  | Predicted<br>transposon                        |
| 251000 | 252000 | E=1.9e-33 | At3g29265.1 | MMF24.1, hypothetical protein, GO:0005554 [molecular_function unknown]                                                                                             |  | Predicted<br>transposon                        |
| 255500 | 256500 | E=4.8e-08 | At1g31150.1 | F28K20.8, expressed protein, GO:0005554 [molecular_function unknown]                                                                                               |  | Inserted<br>fragment<br>within model           |
| 257500 | 258500 | E=2.3e-06 | At5g10430.1 | F12B17.220, arabinogalactan-protein (AGP4), GO:0005554 [molecular_function unknown]                                                                                |  | Inserted<br>fragment<br>within model           |
| 258000 | 259000 | E=2.3e-06 | At5g10430.1 | F12B17.220, arabinogalactan-protein (AGP4), GO:0005554 [molecular_function unknown]                                                                                |  | Inserted<br>fragment<br>within model           |
| 260500 | 261500 | E=3.4e-06 | At5g07570.1 | T211.280, glycine/proline-rich protein, GO:0000004 [biological_process unknown] GO:0008372 [cellular_component unknown] GO:0005554 [molecular_function unknown]    |  | Inserted<br>fragment<br>within model           |
| 261000 | 262000 | E=9.6e-09 | At1g62760.1 | F23N19.12, invertase/pectin methylesterase inhibitor family protein, GO:0046910 [pectinesterase inhibitor activity]                                                |  | Inserted<br>fragment<br>outside gene<br>models |
| 262500 | 263500 | E=5.8e-34 | At2g07320.1 | T13E11.9, SWIM zinc finger family protein, GO:0000004 [biological_process unknown] GO:0008372 [cellular_component unknown] GO:0005554 [molecular_function unknown] |  | Inserted<br>fragment<br>within model           |
| 269500 | 270500 | E=1.3e-   | At5g32482.1 | T15F17.6, zinc knuckle (CCHC-type) family protein, GO:0003676                                                                                                      |  | Predicted                                      |

|        |        |                     |             |                                                                                                                                                                                                                                                               |                                                                               |
|--------|--------|---------------------|-------------|---------------------------------------------------------------------------------------------------------------------------------------------------------------------------------------------------------------------------------------------------------------|-------------------------------------------------------------------------------|
| 270000 | 271000 | 40<br>E=3.4e-<br>32 | At5g33303.1 | [nucleic acid binding]<br>F19N2.6, hypothetical protein, GO:0005554 [molecular_function unknown]                                                                                                                                                              | transposon<br>Predicted<br>transposon                                         |
| 276000 | 277000 | E=7.4e-<br>11       | At5g47230.1 | MQL5.9, ethylene-responsive element-binding factor 5 (ERF5), GO:0005634 [nucleus] GO:0003677 [DNA binding] GO:0006355 [regulation of transcription, DNA-dependent] GO:0016563 [transcriptional activator activity] GO:0003700 [transcription factor activity] | Conserved<br>collinear gene                                                   |
| 276500 | 277500 | E=1.9e-<br>10       | At5g47230.1 | MQL5.9, ethylene-responsive element-binding factor 5 (ERF5), GO:0005634 [nucleus] GO:0003677 [DNA binding] GO:0006355 [regulation of transcription, DNA-dependent] GO:0016563 [transcriptional activator activity] GO:0003700 [transcription factor activity] | Conserved<br>collinear gene<br>Inserted<br>fragment<br>outside gene<br>models |
| 278000 | 279000 | E=1.6e-<br>06       | At4g37570.1 | F19F18.60, hypothetical protein, GO:0000004 [biological_process unknown] GO:0008372 [cellular_component unknown] GO:0005554 [molecular_function unknown]                                                                                                      | Inserted<br>fragment<br>outside gene<br>models                                |
| 278500 | 279500 | E=2.0e-<br>14       | At5g07570.1 | T211.280, glycine/proline-rich protein, GO:0000004 [biological_process unknown] GO:0008372 [cellular_component unknown] GO:0005554 [molecular_function unknown]                                                                                               | Inserted<br>fragment<br>outside gene<br>models                                |
| 279000 | 280000 | E=1.8e-<br>15       | At4g17490.1 | FCAALL.120, ethylene-responsive element-binding protein, putative, GO:0005634 [nucleus] GO:0003677 [DNA binding] GO:0006355 [regulation of transcription, DNA-dependent] GO:0003700 [transcription factor activity]                                           | Conserved<br>collinear gene                                                   |
| 279500 | 280500 | E=7.0e-<br>53       | At5g47230.1 | MQL5.9, ethylene-responsive element-binding factor 5 (ERF5), GO:0005634 [nucleus] GO:0003677 [DNA binding] GO:0006355 [regulation of transcription, DNA-dependent] GO:0016563 [transcriptional activator activity] GO:0003700 [transcription factor activity] | Conserved<br>collinear gene                                                   |
| 280000 | 281000 | E=1.7e-<br>41       | At5g47230.1 | MQL5.9, ethylene-responsive element-binding factor 5 (ERF5), GO:0005634 [nucleus] GO:0003677 [DNA binding] GO:0006355 [regulation of transcription, DNA-dependent] GO:0016563 [transcriptional activator activity] GO:0003700 [transcription factor activity] | Conserved<br>collinear gene                                                   |
| 280500 | 281500 | E=5.6e-<br>09       | At5g47230.1 | MQL5.9, ethylene-responsive element-binding factor 5 (ERF5), GO:0005634 [nucleus] GO:0003677 [DNA binding] GO:0006355 [regulation of transcription, DNA-dependent] GO:0016563 [transcriptional activator activity] GO:0003700 [transcription factor activity] | Conserved<br>collinear gene                                                   |
| 284000 | 285000 | E=8.8e-             | At4g23570.2 | F9D16.40, phosphatase-related, GO:0000004 [biological_process                                                                                                                                                                                                 | Inserted                                                                      |

|        |        |           |             |                                                                                                                                                                                                                                                                                                                                                                                                                                                                                                                                                                                                                                                           |                                |
|--------|--------|-----------|-------------|-----------------------------------------------------------------------------------------------------------------------------------------------------------------------------------------------------------------------------------------------------------------------------------------------------------------------------------------------------------------------------------------------------------------------------------------------------------------------------------------------------------------------------------------------------------------------------------------------------------------------------------------------------------|--------------------------------|
|        |        | 11        |             | unknown] GO:0019005 [SCF ubiquitin ligase complex] GO:0008372 [cellular_component unknown] GO:0006511 [ubiquitin-dependent protein catabolism] GO:0005554 [molecular_func F9D16.40, phosphatase-related, GO:0000004 [biological_process unknown] GO:0019005 [SCF ubiquitin ligase complex] GO:0008372 [cellular_component unknown] GO:0006511 [ubiquitin-dependent protein catabolism] GO:0005554 [molecular_func F9D16.40, phosphatase-related, GO:0000004 [biological_process unknown] GO:0019005 [SCF ubiquitin ligase complex] GO:0008372 [cellular_component unknown] GO:0006511 [ubiquitin-dependent protein catabolism] GO:0005554 [molecular_func | fragment within model          |
| 284500 | 285500 | E=1.2e-55 | At4g23570.2 |                                                                                                                                                                                                                                                                                                                                                                                                                                                                                                                                                                                                                                                           | Inserted fragment within model |
| 285000 | 286000 | E=1.2e-38 | At4g23570.2 |                                                                                                                                                                                                                                                                                                                                                                                                                                                                                                                                                                                                                                                           | Inserted fragment within model |

CONTIG D

| Start | Stop  | Score      | BLASTn hit  | Description                                                                                                                     | Classification                                         |
|-------|-------|------------|-------------|---------------------------------------------------------------------------------------------------------------------------------|--------------------------------------------------------|
| 2000  | 3000  | E=7.5e-08  | At1g62760.1 | F23N19.12, invertase/pectin methylesterase inhibitor family protein, GO:0046910 [pectinesterase inhibitor activity]             | Predicted transposon<br>Inserted fragment within model |
| 4500  | 5500  | E=6.9e-06  | At1g25886.1 | F14G11.4, Ulp1 protease family protein, GO:0008234 [cysteine-type peptidase activity] GO:0006508 [proteolysis and peptidolysis] | Inserted fragment within model                         |
| 5000  | 6000  | E=6.9e-06  | At1g25886.1 | F14G11.4, Ulp1 protease family protein, GO:0008234 [cysteine-type peptidase activity] GO:0006508 [proteolysis and peptidolysis] | Inserted fragment within model                         |
| 12000 | 13000 | E=2.4e-26  | At4g17170.1 | FCAALL.365, Rab2-like GTP-binding protein (RAB2), GO:0003924 [GTPase activity] GO:0005525 [GTP binding]                         | Conserved collinear gene                               |
| 12500 | 13500 | E=1.7e-81  | At4g17170.1 | FCAALL.365, Rab2-like GTP-binding protein (RAB2), GO:0003924 [GTPase activity] GO:0005525 [GTP binding]                         | Conserved collinear gene                               |
| 13000 | 14000 | E=3.2e-69  | At4g17170.1 | FCAALL.365, Rab2-like GTP-binding protein (RAB2), GO:0003924 [GTPase activity] GO:0005525 [GTP binding]                         | Conserved collinear gene                               |
| 13500 | 14500 | E=2.5e-30  | At4g17170.1 | FCAALL.365, Rab2-like GTP-binding protein (RAB2), GO:0003924 [GTPase activity] GO:0005525 [GTP binding]                         | Conserved collinear gene                               |
| 15500 | 16500 | E=2.9e-73  | At4g17210.1 | FCAALL.382, myosin heavy chain-related, GO:0005554 [molecular_function unknown]                                                 | Conserved collinear gene                               |
| 16000 | 17000 | E=2.1e-144 | At4g17210.1 | FCAALL.382, myosin heavy chain-related, GO:0005554 [molecular_function unknown]                                                 | Conserved collinear gene                               |
| 16500 | 17500 | E=2.3e-130 | At4g17210.1 | FCAALL.382, myosin heavy chain-related, GO:0005554 [molecular_function unknown]                                                 | Conserved collinear gene                               |
| 17000 | 18000 | E=2.6e-87  | At4g17210.1 | FCAALL.382, myosin heavy chain-related, GO:0005554 [molecular_function unknown]                                                 | Conserved collinear gene                               |
| 17500 | 18500 | E=4.4e-25  | At4g17210.1 | FCAALL.382, myosin heavy chain-related, GO:0005554 [molecular_function unknown]                                                 | Conserved collinear gene                               |

|       |       |            |             |                                                                                            |                                       |
|-------|-------|------------|-------------|--------------------------------------------------------------------------------------------|---------------------------------------|
| 18000 | 19000 | E=5.7e-32  | At4g06599.1 | T11G11.4, ubiquitin family protein, GO:0005554 [molecular_function unknown]                | Inserted fragment outside gene models |
| 19500 | 20500 | E=1.1e-62  | At4g17215.1 | FCAALL.231, expressed protein, GO:0005554 [molecular_function unknown]                     | Conserved collinear gene              |
| 20000 | 21000 | E=6.9e-55  | At4g17215.1 | FCAALL.231, expressed protein, GO:0005554 [molecular_function unknown]                     | Conserved collinear gene              |
| 20500 | 21500 | E=3.0e-43  | At4g17220.1 | FCAALL.385, expressed protein, GO:0005554 [molecular_function unknown]                     | Conserved collinear gene              |
| 21000 | 22000 | E=2.7e-97  | At4g17220.1 | FCAALL.385, expressed protein, GO:0005554 [molecular_function unknown]                     | Conserved collinear gene              |
| 21500 | 22500 | E=1.0e-107 | At4g17220.1 | FCAALL.385, expressed protein, GO:0005554 [molecular_function unknown]                     | Conserved collinear gene              |
| 22000 | 23000 | E=1.2e-87  | At4g17220.1 | FCAALL.385, expressed protein, GO:0005554 [molecular_function unknown]                     | Conserved collinear gene              |
| 22500 | 23500 | E=7.6e-33  | At4g17220.1 | FCAALL.385, expressed protein, GO:0005554 [molecular_function unknown]                     | Conserved collinear gene              |
| 24500 | 25500 | E=2.2e-47  | At4g17250.1 | FCAALL.204, expressed protein, GO:0005554 [molecular_function unknown]                     | Conserved collinear gene              |
| 25000 | 26000 | E=2.9e-123 | At4g17250.1 | FCAALL.204, expressed protein, GO:0005554 [molecular_function unknown]                     | Conserved collinear gene              |
| 25500 | 26500 | E=2.9e-123 | At4g17250.1 | FCAALL.204, expressed protein, GO:0005554 [molecular_function unknown]                     | Conserved collinear gene              |
| 26000 | 27000 | E=3.7e-104 | At5g47580.1 | MNJ7.17, expressed protein, GO:0005554 [molecular_function unknown]                        | Conserved collinear gene              |
| 26500 | 27500 | E=6.7e-91  | At5g47580.1 | MNJ7.17, expressed protein, GO:0005554 [molecular_function unknown]                        | Conserved collinear gene              |
| 27000 | 28000 | E=3.0e-26  | At5g47580.1 | MNJ7.17, expressed protein, GO:0005554 [molecular_function unknown]                        | Conserved collinear gene              |
| 28000 | 29000 | E=2.1e-73  | At4g17260.1 | FCAALL.172, L-lactate dehydrogenase, putative, GO:0004457 [lactate dehydrogenase activity] | Conserved collinear gene              |
| 28500 | 29500 | E=2.4e-90  | At4g17260.1 | FCAALL.172, L-lactate dehydrogenase, putative, GO:0004457 [lactate dehydrogenase activity] | Conserved collinear gene              |
| 29000 | 30000 | E=1.1e-73  | At4g17260.1 | FCAALL.172, L-lactate dehydrogenase, putative, GO:0004457 [lactate dehydrogenase activity] | Conserved collinear gene              |
| 29500 | 30500 | E=3.9e-12  | At4g17260.1 | FCAALL.172, L-lactate dehydrogenase, putative, GO:0004457 [lactate dehydrogenase activity] | Conserved collinear gene              |
| 32000 | 33000 | E=1.7e-33  | At4g17270.1 | FCAALL.22, Mo25 family protein, GO:0005554 [molecular_function unknown]                    | Conserved collinear gene              |
| 32500 | 33500 | E=1.2e-33  | At4g17270.1 | FCAALL.22, Mo25 family protein, GO:0005554 [molecular_function unknown]                    | Conserved                             |



|       |       |           |             |                                                                                                                                                                                                                          |  |                                       |
|-------|-------|-----------|-------------|--------------------------------------------------------------------------------------------------------------------------------------------------------------------------------------------------------------------------|--|---------------------------------------|
|       |       |           |             |                                                                                                                                                                                                                          |  | within model                          |
| 44500 | 45500 | E=6.5e-57 | At3g58410.1 | F9D24.320, meprin and TRAF homology domain-containing protein / MATH domain-containing protein, GO:0000004 [biological_process unknown] GO:0008372 [cellular_component unknown] GO:0005554 [molecular_function unknown]  |  | Inserted fragment within model        |
| 45000 | 46000 | E=1.3e-50 | At4g17430.1 | FCAALL.1, expressed protein, GO:0005554 [molecular_function unknown]                                                                                                                                                     |  | Additional collinear gene fragment    |
| 45500 | 46500 | E=6.6e-49 | At4g17430.1 | FCAALL.1, expressed protein, GO:0005554 [molecular_function unknown]                                                                                                                                                     |  | Additional collinear gene fragment    |
| 46500 | 47500 | E=2.0e-36 | At5g47390.1 | MQL5.25, myb family transcription factor, GO:0003677 [DNA binding] GO:0003700 [transcription factor activity]                                                                                                            |  | Conserved collinear gene              |
| 47000 | 48000 | E=4.0e-92 | At5g47390.1 | MQL5.25, myb family transcription factor, GO:0003677 [DNA binding] GO:0003700 [transcription factor activity]                                                                                                            |  | Conserved collinear gene              |
| 47500 | 48500 | E=1.9e-59 | At5g47390.1 | MQL5.25, myb family transcription factor, GO:0003677 [DNA binding] GO:0003700 [transcription factor activity]                                                                                                            |  | Conserved collinear gene              |
| 57500 | 58500 | E=2.8e-24 | At4g17440.1 | FCAALL.6, expressed protein, GO:0005554 [molecular_function unknown]                                                                                                                                                     |  | Conserved collinear gene              |
| 58000 | 59000 | E=2.8e-24 | At4g17440.1 | FCAALL.6, expressed protein, GO:0005554 [molecular_function unknown]                                                                                                                                                     |  | Conserved collinear gene              |
| 59000 | 60000 | E=1.4e-15 | At3g52110.1 | F4F15.220, expressed protein, GO:0005554 [molecular_function unknown]                                                                                                                                                    |  | Inserted fragment outside gene models |
| 59500 | 60500 | E=1.4e-15 | At3g52110.1 | F4F15.220, expressed protein, GO:0005554 [molecular_function unknown]                                                                                                                                                    |  | Inserted fragment outside gene models |
| 60500 | 61500 | E=1.4e-07 | At1g18900.2 | F14D16.2, pentatricopeptide (PPR) repeat-containing protein, GO:0000004 [biological_process unknown] GO:0008372 [cellular_component unknown] GO:0005554 [molecular_function unknown]                                     |  | Inserted fragment outside gene models |
| 61000 | 62000 | E=1.4e-07 | At1g18900.2 | F14D16.2, pentatricopeptide (PPR) repeat-containing protein, GO:0000004 [biological_process unknown] GO:0008372 [cellular_component unknown] GO:0005554 [molecular_function unknown]                                     |  | Inserted fragment outside gene models |
| 68500 | 69500 | E=3.0e-41 | At4g17460.1 | FCAALL.65, homeobox-leucine zipper protein 1 (HAT1) / HD-ZIP protein 1, GO:0005634 [nucleus] GO:0003677 [DNA binding] GO:0006355 [regulation of transcription, DNA-dependent] GO:0003700 [transcription factor activity] |  | Conserved collinear gene              |



|       |       |           |             |                                                                                                                                                                                                                              |                          |
|-------|-------|-----------|-------------|------------------------------------------------------------------------------------------------------------------------------------------------------------------------------------------------------------------------------|--------------------------|
| 69000 | 70000 | E=1.3e-94 | At4g17460.1 | FCAALL.65, homeobox-leucine zipper protein 1 (HAT1) / HD-ZIP protein 1, GO:0005634 [nucleus] GO:0003677 [DNA binding] GO:0006355 [regulation of transcription, DNA-dependent] GO:0003700 [transcription factor activity]     | Conserved collinear gene |
| 69500 | 70500 | E=1.2e-65 | At4g17460.1 | FCAALL.65, homeobox-leucine zipper protein 1 (HAT1) / HD-ZIP protein 1, GO:0005634 [nucleus] GO:0003677 [DNA binding] GO:0006355 [regulation of transcription, DNA-dependent] GO:0003700 [transcription factor activity]     | Conserved collinear gene |
| 70000 | 71000 | E=1.1e-08 | At4g17460.1 | FCAALL.65, homeobox-leucine zipper protein 1 (HAT1) / HD-ZIP protein 1, GO:0005634 [nucleus] GO:0003677 [DNA binding] GO:0006355 [regulation of transcription, DNA-dependent] GO:0003700 [transcription factor activity]     | Conserved collinear gene |
| 70500 | 71500 | E=1.6e-13 | At4g17483.1 | FCAALL.16, palmitoyl protein thioesterase family protein, GO:0008474 [palmitoyl-(protein) hydrolase activity]                                                                                                                | Conserved collinear gene |
| 71000 | 72000 | E=3.7e-32 | At4g17483.1 | FCAALL.16, palmitoyl protein thioesterase family protein, GO:0008474 [palmitoyl-(protein) hydrolase activity]                                                                                                                | Conserved collinear gene |
| 71500 | 72500 | E=1.2e-63 | At4g17483.1 | FCAALL.16, palmitoyl protein thioesterase family protein, GO:0008474 [palmitoyl-(protein) hydrolase activity]                                                                                                                | Conserved collinear gene |
| 72000 | 73000 | E=2.8e-42 | At4g17483.1 | FCAALL.16, palmitoyl protein thioesterase family protein, GO:0008474 [palmitoyl-(protein) hydrolase activity]                                                                                                                | Conserved collinear gene |
| 72500 | 73500 | E=2.8e-09 | At4g17483.1 | FCAALL.16, palmitoyl protein thioesterase family protein, GO:0008474 [palmitoyl-(protein) hydrolase activity]                                                                                                                | Conserved collinear gene |
| 74500 | 75500 | E=2.2e-45 | At4g17486.1 | FCAALL.234, expressed protein, GO:0005554 [molecular_function unknown]                                                                                                                                                       | Conserved collinear gene |
| 75000 | 76000 | E=5.8e-75 | At4g17486.1 | FCAALL.234, expressed protein, GO:0005554 [molecular_function unknown]                                                                                                                                                       | Conserved collinear gene |
| 75500 | 76500 | E=1.2e-33 | At5g47310.1 | MQL5.17, expressed protein, GO:0005554 [molecular_function unknown]                                                                                                                                                          | Conserved collinear gene |
| 76000 | 77000 | E=7.3e-08 | At4g17510.1 | FCAALL.31, ubiquitin carboxyl-terminal hydrolase, putative / ubiquitin thiolesterase, putative, GO:0005622 [intracellular] GO:0004221 [ubiquitin thiolesterase activity] GO:0006511 [ubiquitin-dependent protein catabolism] | Conserved collinear gene |
| 76500 | 77500 | E=4.1e-38 | At4g17510.1 | FCAALL.31, ubiquitin carboxyl-terminal hydrolase, putative / ubiquitin thiolesterase, putative, GO:0005622 [intracellular] GO:0004221 [ubiquitin thiolesterase activity] GO:0006511 [ubiquitin-dependent protein catabolism] | Conserved collinear gene |
| 77000 | 78000 | E=2.6e-60 | At4g17510.1 | FCAALL.31, ubiquitin carboxyl-terminal hydrolase, putative / ubiquitin thiolesterase, putative, GO:0005622 [intracellular] GO:0004221 [ubiquitin thiolesterase activity] GO:0006511 [ubiquitin-dependent protein catabolism] | Conserved collinear gene |
| 77500 | 78500 | E=1.5e-   | At4g17510.1 | FCAALL.31, ubiquitin carboxyl-terminal hydrolase, putative / ubiquitin                                                                                                                                                       | Conserved                |

|       |       |            |             |                                                                                                                                                       |                                       |
|-------|-------|------------|-------------|-------------------------------------------------------------------------------------------------------------------------------------------------------|---------------------------------------|
|       |       | 47         |             | thiolesterase, putative, GO:0005622 [intracellular] GO:0004221 [ubiquitin thiolesterase activity] GO:0006511 [ubiquitin-dependent protein catabolism] | collinear gene                        |
| 78000 | 79000 | E=3.2e-14  | At4g17520.1 | FCAALL.142, nuclear RNA-binding protein, putative, GO:0003723 [RNA binding]                                                                           | Conserved collinear gene              |
| 78500 | 79500 | E=5.7e-47  | At4g17520.1 | FCAALL.142, nuclear RNA-binding protein, putative, GO:0003723 [RNA binding]                                                                           | Conserved collinear gene              |
| 79000 | 80000 | E=6.8e-51  | At4g17520.1 | FCAALL.142, nuclear RNA-binding protein, putative, GO:0003723 [RNA binding]                                                                           | Conserved collinear gene              |
| 79500 | 80500 | E=6.5e-58  | At4g17520.1 | FCAALL.142, nuclear RNA-binding protein, putative, GO:0003723 [RNA binding]                                                                           | Conserved collinear gene              |
| 80000 | 81000 | E=1.9e-31  | At4g17520.1 | FCAALL.142, nuclear RNA-binding protein, putative, GO:0003723 [RNA binding]                                                                           | Conserved collinear gene              |
| 80500 | 81500 | E=2.4e-41  | At4g17530.1 | FCAALL.87, Ras-related GTP-binding protein, putative, GO:0005525 [GTP binding]                                                                        | Conserved collinear gene              |
| 81000 | 82000 | E=1.4e-59  | At4g17530.1 | FCAALL.87, Ras-related GTP-binding protein, putative, GO:0005525 [GTP binding]                                                                        | Conserved collinear gene              |
| 81500 | 82500 | E=1.9e-24  | At4g17530.1 | FCAALL.87, Ras-related GTP-binding protein, putative, GO:0005525 [GTP binding]                                                                        | Conserved collinear gene              |
| 84500 | 85500 | E=8.3e-29  | At4g17550.1 | FCAALL.41, transporter-related, GO:0005351 [sugar porter activity] GO:0008643 [carbohydrate transport]                                                | Conserved collinear gene              |
| 85000 | 86000 | E=1.6e-104 | At4g17550.1 | FCAALL.41, transporter-related, GO:0005351 [sugar porter activity] GO:0008643 [carbohydrate transport]                                                | Conserved collinear gene              |
| 85500 | 86500 | E=1.7e-134 | At4g17550.1 | FCAALL.41, transporter-related, GO:0005351 [sugar porter activity] GO:0008643 [carbohydrate transport]                                                | Conserved collinear gene              |
| 86000 | 87000 | E=4.1e-107 | At4g17550.1 | FCAALL.41, transporter-related, GO:0005351 [sugar porter activity] GO:0008643 [carbohydrate transport]                                                | Conserved collinear gene              |
| 86500 | 87500 | E=1.2e-34  | At4g17550.1 | FCAALL.41, transporter-related, GO:0005351 [sugar porter activity] GO:0008643 [carbohydrate transport]                                                | Conserved collinear gene              |
| 92500 | 93500 | E=7.3e-37  | At5g47110.1 | K14A3.6, lil3 protein, putative, GO:0009765 [photosynthesis light harvesting] GO:0005554 [molecular_function unknown]                                 | Conserved collinear gene              |
| 93000 | 94000 | E=6.1e-72  | At5g47110.1 | K14A3.6, lil3 protein, putative, GO:0009765 [photosynthesis light harvesting] GO:0005554 [molecular_function unknown]                                 | Conserved collinear gene              |
| 93500 | 94500 | E=1.7e-34  | At4g17600.1 | FCAALL.30, lil3 protein, GO:0005554 [molecular_function unknown] GO:0003700 [transcription factor activity]                                           | Conserved collinear gene              |
| 94000 | 95000 | E=4.5e-10  | At1g45165.1 | F27F5.24, Expressed protein, GO:0005554 [molecular_function unknown]                                                                                  | Inserted fragment outside gene models |
| 98000 | 99000 | E=4.3e-21  | At4g17615.1 | FCAALL.122, calcineurin B-like protein 1 (CBL1), GO:0006970 [response to osmotic stress] GO:0019722 [calcium-mediated signaling]                      | Conserved collinear gene              |

|        |        |           |             |                                                                                                                                                                                                |                           |
|--------|--------|-----------|-------------|------------------------------------------------------------------------------------------------------------------------------------------------------------------------------------------------|---------------------------|
| 98500  | 99500  | E=2.3e-19 | At4g17615.1 | GO:0005509 [calcium ion binding] GO:0005886 [plasma membrane] FCAALL.122, calcineurin B-like protein 1 (CBL1), GO:0006970 [response to osmotic stress] GO:0019722 [calcium-mediated signaling] | Conserved collinear gene  |
| 99000  | 100000 | E=4.1e-41 | At4g17615.2 | GO:0005509 [calcium ion binding] GO:0005886 [plasma membrane] FCAALL.122, calcineurin B-like protein 1 (CBL1), GO:0006970 [response to osmotic stress] GO:0019722 [calcium-mediated signaling] | Conserved collinear gene  |
| 99500  | 100500 | E=1.4e-50 | At4g17615.1 | GO:0005509 [calcium ion binding] GO:0005886 [plasma membrane] FCAALL.122, calcineurin B-like protein 1 (CBL1), GO:0006970 [response to osmotic stress] GO:0019722 [calcium-mediated signaling] | Conserved collinear gene  |
| 100000 | 101000 | E=1.7e-17 | At4g17615.1 | GO:0005509 [calcium ion binding] GO:0005886 [plasma membrane]                                                                                                                                  | Conserved collinear gene  |
| 102500 | 103500 | E=6.2e-11 | At4g17620.1 | FCAALL.74, glycine-rich protein, GO:0005554 [molecular_function unknown]                                                                                                                       | Conserved collinear gene  |
| 103000 | 104000 | E=6.3e-22 | At4g17620.1 | FCAALL.74, glycine-rich protein, GO:0005554 [molecular_function unknown]                                                                                                                       | Conserved collinear gene  |
| 103500 | 104500 | E=2.9e-52 | At4g17620.1 | FCAALL.74, glycine-rich protein, GO:0005554 [molecular_function unknown]                                                                                                                       | Conserved collinear gene  |
| 104000 | 105000 | E=9.3e-46 | At4g17620.1 | FCAALL.74, glycine-rich protein, GO:0005554 [molecular_function unknown]                                                                                                                       | Conserved collinear gene  |
| 104500 | 105500 | E=1.1e-57 | At4g17620.1 | FCAALL.74, glycine-rich protein, GO:0005554 [molecular_function unknown]                                                                                                                       | Conserved collinear gene  |
| 105000 | 106000 | E=1.6e-46 | At4g17620.1 | FCAALL.74, glycine-rich protein, GO:0005554 [molecular_function unknown]                                                                                                                       | Conserved collinear gene  |
| 105500 | 106500 | E=2.3e-47 | At4g17620.1 | FCAALL.74, glycine-rich protein, GO:0005554 [molecular_function unknown]                                                                                                                       | Conserved collinear gene  |
| 106000 | 107000 | E=2.6e-25 | At4g17640.1 | FCAALL.14, casein kinase II beta chain, putative, GO:0005956 [protein kinase CK2 complex] GO:0008605 [protein kinase CK2 regulator activity]                                                   | Conserved collinear gene  |
| 106500 | 107500 | E=1.7e-68 | At4g17640.1 | FCAALL.14, casein kinase II beta chain, putative, GO:0005956 [protein kinase CK2 complex] GO:0008605 [protein kinase CK2 regulator activity]                                                   | Conserved collinear gene  |
| 107000 | 108000 | E=2.3e-71 | At4g17640.1 | FCAALL.14, casein kinase II beta chain, putative, GO:0005956 [protein kinase CK2 complex] GO:0008605 [protein kinase CK2 regulator activity]                                                   | Conserved collinear gene  |
| 107500 | 108500 | E=1.3e-43 | At5g47080.1 | MQD22.23, casein kinase II beta chain, putative, GO:0005956 [protein kinase CK2 complex] GO:0008605 [protein kinase CK2 regulator activity]                                                    | Conserved collinear gene  |
| 108000 | 109000 | E=2.2e-32 | At4g17660.1 | FCAALL.77, protein kinase, putative, GO:0016301 [kinase activity]                                                                                                                              | Additional collinear gene |

|        |        |            |             |                                                                                            |                                                |
|--------|--------|------------|-------------|--------------------------------------------------------------------------------------------|------------------------------------------------|
| 108500 | 109500 | E=3.2e-54  | At4g17660.1 | FCAALL.77, protein kinase, putative, GO:0016301 [kinase activity]                          | fragment<br>Additional collinear gene fragment |
| 109000 | 110000 | E=3.0e-16  | At4g17660.1 | FCAALL.77, protein kinase, putative, GO:0016301 [kinase activity]                          | Additional collinear gene fragment             |
| 110000 | 111000 | E=2.9e-17  | At4g17660.1 | FCAALL.77, protein kinase, putative, GO:0016301 [kinase activity]                          | Additional collinear gene fragment             |
| 110500 | 111500 | E=5.6e-17  | At4g17660.1 | FCAALL.77, protein kinase, putative, GO:0016301 [kinase activity]                          | Additional collinear gene fragment             |
| 111000 | 112000 | E=8.4e-29  | At4g17670.1 | FCAALL.414, senescence-associated protein-related, GO:0005554 [molecular_function unknown] | Conserved collinear gene                       |
| 111500 | 112500 | E=8.8e-69  | At4g17670.1 | FCAALL.414, senescence-associated protein-related, GO:0005554 [molecular_function unknown] | Conserved collinear gene                       |
| 112000 | 113000 | E=4.0e-31  | At4g17670.1 | FCAALL.414, senescence-associated protein-related, GO:0005554 [molecular_function unknown] | Conserved collinear gene                       |
| 126500 | 127500 | E=1.2e-11  | At2g31700.1 | T9H9.22, hypothetical protein, GO:0005554 [molecular_function unknown]                     | Inserted fragment outside gene models          |
| 127000 | 128000 | E=1.4e-07  | At2g31700.1 | T9H9.22, hypothetical protein, GO:0005554 [molecular_function unknown]                     | Inserted fragment outside gene models          |
| 131000 | 132000 | E=5.1e-41  | At4g17680.1 | FCAALL.78, expressed protein, GO:0005554 [molecular_function unknown]                      | Conserved collinear gene                       |
| 131500 | 132500 | E=2.7e-82  | At4g17680.1 | FCAALL.78, expressed protein, GO:0005554 [molecular_function unknown]                      | Conserved collinear gene                       |
| 132000 | 133000 | E=1.3e-34  | At4g17680.1 | FCAALL.78, expressed protein, GO:0005554 [molecular_function unknown]                      | Conserved collinear gene                       |
| 138500 | 139500 | E=4.0e-63  | At4g17690.1 | FCAALL.96, peroxidase, putative, GO:0004601 [peroxidase activity]                          | Conserved collinear gene                       |
| 139000 | 140000 | E=7.9e-138 | At4g17690.1 | FCAALL.96, peroxidase, putative, GO:0004601 [peroxidase activity]                          | Conserved collinear gene                       |
| 139500 | 140500 | E=1.7e-84  | At4g17690.1 | FCAALL.96, peroxidase, putative, GO:0004601 [peroxidase activity]                          | Conserved collinear gene                       |
| 140000 | 141000 | E=2.6e-06  | At4g17690.1 | FCAALL.96, peroxidase, putative, GO:0004601 [peroxidase activity]                          | Conserved collinear gene                       |

|        |        |           |             |                                                                                              |                                       |
|--------|--------|-----------|-------------|----------------------------------------------------------------------------------------------|---------------------------------------|
| 145500 | 146500 | E=1.0e-11 | At2g31700.1 | T9H9.22, hypothetical protein, GO:0005554 [molecular_function unknown]                       | Inserted fragment outside gene models |
| 146000 | 147000 | E=1.0e-11 | At2g31700.1 | T9H9.22, hypothetical protein, GO:0005554 [molecular_function unknown]                       | Inserted fragment outside gene models |
| 146500 | 147500 | E=6.1e-06 | At2g31700.1 | T9H9.22, hypothetical protein, GO:0005554 [molecular_function unknown]                       | Inserted fragment outside gene models |
| 163500 | 164500 | E=1.5e-40 | At5g32482.1 | T15F17.6, zinc knuckle (CCHC-type) family protein, GO:0003676 [nucleic acid binding]         | Predicted transposon                  |
| 164000 | 165000 | E=2.6e-43 | At5g32482.1 | T15F17.6, zinc knuckle (CCHC-type) family protein, GO:0003676 [nucleic acid binding]         | Predicted transposon                  |
| 173000 | 174000 | E=1.3e-07 | At3g28770.1 | T19N8.6, expressed protein, GO:0005554 [molecular_function unknown]                          | Inserted fragment within model        |
| 180000 | 181000 | E=1.1e-41 | At4g17720.1 | FCAALL.73, RNA recognition motif (RRM)-containing protein, GO:0003676 [nucleic acid binding] | fragment only                         |
| 180500 | 181500 | E=5.3e-94 | At4g17720.1 | FCAALL.73, RNA recognition motif (RRM)-containing protein, GO:0003676 [nucleic acid binding] | fragment only                         |
| 181000 | 182000 | E=7.7e-48 | At4g17720.1 | FCAALL.73, RNA recognition motif (RRM)-containing protein, GO:0003676 [nucleic acid binding] | fragment only                         |
| 187000 | 188000 | E=2.8e-43 | At4g17720.1 | FCAALL.73, RNA recognition motif (RRM)-containing protein, GO:0003676 [nucleic acid binding] | fragment only                         |
| 187500 | 188500 | E=2.8e-43 | At4g17720.1 | FCAALL.73, RNA recognition motif (RRM)-containing protein, GO:0003676 [nucleic acid binding] | fragment only                         |
| 188000 | 189000 | E=2.8e-43 | At4g17720.1 | FCAALL.73, RNA recognition motif (RRM)-containing protein, GO:0003676 [nucleic acid binding] | fragment only                         |
| 194000 | 195000 | E=1.6e-68 | At4g17720.1 | FCAALL.73, RNA recognition motif (RRM)-containing protein, GO:0003676 [nucleic acid binding] | fragment only                         |
| 194500 | 195500 | E=5.3e-94 | At4g17720.1 | FCAALL.73, RNA recognition motif (RRM)-containing protein, GO:0003676 [nucleic acid binding] | fragment only                         |
| 195000 | 196000 | E=3.4e-21 | At4g17720.1 | FCAALL.73, RNA recognition motif (RRM)-containing protein, GO:0003676 [nucleic acid binding] | fragment only                         |
| 199000 | 200000 | E=3.3e-08 | At3g28770.1 | T19N8.6, expressed protein, GO:0005554 [molecular_function unknown]                          | Inserted fragment within model        |
| 209500 | 210500 | E=1.1e-   | At3g28770.1 | T19N8.6, expressed protein, GO:0005554 [molecular_function                                   | Inserted                              |

|        |        |            |             |                                                                                                                                                                                                                                               |  |                             |
|--------|--------|------------|-------------|-----------------------------------------------------------------------------------------------------------------------------------------------------------------------------------------------------------------------------------------------|--|-----------------------------|
|        |        | 07         |             | unknown]                                                                                                                                                                                                                                      |  | fragment<br>within model    |
| 217500 | 218500 | E=1.2e-29  | At4g17720.1 | FCAALL.73, RNA recognition motif (RRM)-containing protein, GO:0003676 [nucleic acid binding]                                                                                                                                                  |  | fragment only               |
| 218000 | 219000 | E=5.3e-94  | At4g17720.1 | FCAALL.73, RNA recognition motif (RRM)-containing protein, GO:0003676 [nucleic acid binding]                                                                                                                                                  |  | fragment only               |
| 218500 | 219500 | E=6.7e-60  | At4g17720.1 | FCAALL.73, RNA recognition motif (RRM)-containing protein, GO:0003676 [nucleic acid binding]                                                                                                                                                  |  | fragment only               |
| 224500 | 225500 | E=2.8e-43  | At4g17720.1 | FCAALL.73, RNA recognition motif (RRM)-containing protein, GO:0003676 [nucleic acid binding]                                                                                                                                                  |  | Conserved<br>collinear gene |
| 225000 | 226000 | E=1.1e-60  | At4g17720.1 | FCAALL.73, RNA recognition motif (RRM)-containing protein, GO:0003676 [nucleic acid binding]                                                                                                                                                  |  | Conserved<br>collinear gene |
| 225500 | 226500 | E=3.7e-41  | At4g17720.1 | FCAALL.73, RNA recognition motif (RRM)-containing protein, GO:0003676 [nucleic acid binding]                                                                                                                                                  |  | Conserved<br>collinear gene |
| 226000 | 227000 | E=2.4e-10  | At4g17720.1 | FCAALL.73, RNA recognition motif (RRM)-containing protein, GO:0003676 [nucleic acid binding]                                                                                                                                                  |  | Conserved<br>collinear gene |
| 232000 | 233000 | E=2.4e-60  | At4g17720.1 | FCAALL.73, RNA recognition motif (RRM)-containing protein, GO:0003676 [nucleic acid binding]                                                                                                                                                  |  | fragment only               |
| 232500 | 233500 | E=7.8e-116 | At4g17720.1 | FCAALL.73, RNA recognition motif (RRM)-containing protein, GO:0003676 [nucleic acid binding]                                                                                                                                                  |  | fragment only               |
| 233000 | 234000 | E=1.5e-53  | At4g17720.1 | FCAALL.73, RNA recognition motif (RRM)-containing protein, GO:0003676 [nucleic acid binding]                                                                                                                                                  |  | fragment only               |
| 233500 | 234500 | E=3.5e-12  | At4g17720.1 | FCAALL.73, RNA recognition motif (RRM)-containing protein, GO:0003676 [nucleic acid binding]                                                                                                                                                  |  | fragment only               |
| 234500 | 235500 | E=1.5e-27  | At5g46860.1 | MSD23.9, syntaxin 22 (SYP22) (VAM3), GO:0030140 [trans-Golgi network transport vesicle] GO:0005770 [late endosome] GO:0006944 [membrane fusion] GO:0009705 [vacuolar membrane (sensu Magnoliophyta)] GO:0006886 [intracellular protein transp |  | Conserved<br>collinear gene |
| 235000 | 236000 | E=9.9e-54  | At5g46860.1 | MSD23.9, syntaxin 22 (SYP22) (VAM3), GO:0030140 [trans-Golgi network transport vesicle] GO:0005770 [late endosome] GO:0006944 [membrane fusion] GO:0009705 [vacuolar membrane (sensu Magnoliophyta)] GO:0006886 [intracellular protein transp |  | Conserved<br>collinear gene |
| 235500 | 236500 | E=2.6e-41  | At4g17730.1 | FCAALL.117, syntaxin 23 (SYP23) / PEP12-like protein, GO:0006944 [membrane fusion] GO:0006886 [intracellular protein transport] GO:0005486 [t-SNARE activity]                                                                                 |  | Conserved<br>collinear gene |
| 236000 | 237000 | E=6.7e-33  | At4g17740.2 | FCAALL.169, C-terminal processing protease, putative, GO:0009543 [thylakoid lumen (sensu Viridiplantae)] GO:0007242 [intracellular signaling cascade]                                                                                         |  | Conserved<br>collinear gene |
| 236500 | 237500 | E=2.0e-53  | At4g17740.2 | FCAALL.169, C-terminal processing protease, putative, GO:0009543 [thylakoid lumen (sensu Viridiplantae)] GO:0007242 [intracellular signaling cascade]                                                                                         |  | Conserved<br>collinear gene |

|        |        |           |             |                                                                                                                                                       |                                |
|--------|--------|-----------|-------------|-------------------------------------------------------------------------------------------------------------------------------------------------------|--------------------------------|
| 237000 | 238000 | E=2.2e-48 | At4g17740.2 | FCAALL.169, C-terminal processing protease, putative, GO:0009543 [thylakoid lumen (sensu Viridiplantae)] GO:0007242 [intracellular signaling cascade] | Conserved collinear gene       |
| 237500 | 238500 | E=5.9e-85 | At4g17740.1 | FCAALL.169, C-terminal processing protease, putative, GO:0009543 [thylakoid lumen (sensu Viridiplantae)] GO:0007242 [intracellular signaling cascade] | Conserved collinear gene       |
| 238000 | 239000 | E=1.8e-81 | At4g17740.2 | FCAALL.169, C-terminal processing protease, putative, GO:0009543 [thylakoid lumen (sensu Viridiplantae)] GO:0007242 [intracellular signaling cascade] | Conserved collinear gene       |
| 238500 | 239500 | E=9.2e-50 | At4g17740.1 | FCAALL.169, C-terminal processing protease, putative, GO:0009543 [thylakoid lumen (sensu Viridiplantae)] GO:0007242 [intracellular signaling cascade] | Conserved collinear gene       |
| 239000 | 240000 | E=1.3e-06 | At4g17740.1 | FCAALL.169, C-terminal processing protease, putative, GO:0009543 [thylakoid lumen (sensu Viridiplantae)] GO:0007242 [intracellular signaling cascade] | Conserved collinear gene       |
| 240000 | 241000 | E=1.1e-38 | At5g10240.1 | F18D22.10, asparagine synthetase 3 (ASN3), GO:0006529 [asparagine biosynthesis] GO:0004066 [asparagine synthase (glutamine-hydrolyzing) activity]     | Inserted fragment within model |
| 240500 | 241500 | E=1.6e-40 | At5g10240.1 | F18D22.10, asparagine synthetase 3 (ASN3), GO:0006529 [asparagine biosynthesis] GO:0004066 [asparagine synthase (glutamine-hydrolyzing) activity]     | Inserted fragment within model |
| 242500 | 243500 | E=1.6e-08 | At3g43460.1 | T18D12.30, hypothetical protein, GO:0005554 [molecular_function unknown]                                                                              | Inserted fragment within model |
| 243000 | 244000 | E=1.5e-15 | At3g43460.1 | T18D12.30, hypothetical protein, GO:0005554 [molecular_function unknown]                                                                              | Inserted fragment within model |
| 246000 | 247000 | E=2.9e-08 | At3g42690.1 | T12K4.140, Ulp1 protease family protein, GO:0008234 [cysteine-type peptidase activity] GO:0006508 [proteolysis and peptidolysis]                      | Inserted fragment within model |
| 254500 | 255500 | E=1.2e-12 | At4g17760.1 | FCAALL.108, expressed protein, GO:0005554 [molecular_function unknown]                                                                                | Conserved collinear gene       |
| 255000 | 256000 | E=2.2e-44 | At4g17760.1 | FCAALL.108, expressed protein, GO:0005554 [molecular_function unknown]                                                                                | Conserved collinear gene       |
| 255500 | 256500 | E=2.9e-70 | At4g17760.1 | FCAALL.108, expressed protein, GO:0005554 [molecular_function unknown]                                                                                | Conserved collinear gene       |
| 256000 | 257000 | E=3.5e-72 | At4g17760.1 | FCAALL.108, expressed protein, GO:0005554 [molecular_function unknown]                                                                                | Conserved collinear gene       |
| 256500 | 257500 | E=2.6e-20 | At4g17760.1 | FCAALL.108, expressed protein, GO:0005554 [molecular_function unknown]                                                                                | Conserved collinear gene       |
| 274500 | 275500 | E=9.7e-   | At4g17770.1 | FCAALL.9, glycosyl transferase family 20 protein / trehalose-                                                                                         | Conserved                      |

|        |        |            |             |                                                                                                                                                                                                                                                                                                                                                                                                                                                                                                                                                 |                          |
|--------|--------|------------|-------------|-------------------------------------------------------------------------------------------------------------------------------------------------------------------------------------------------------------------------------------------------------------------------------------------------------------------------------------------------------------------------------------------------------------------------------------------------------------------------------------------------------------------------------------------------|--------------------------|
|        |        | 42         |             | phosphatase family protein, GO:0005992 [trehalose biosynthesis]<br>GO:0004805 [trehalose-phosphatase activity] GO:0016757 [transferase activity, transferring glycosyl groups] GO:0003825 [alpha,alpha-trehalose-phosphate synthase (UD<br>FCAALL.9, glycosyl transferase family 20 protein / trehalose-phosphatase family protein, GO:0005992 [trehalose biosynthesis]<br>GO:0004805 [trehalose-phosphatase activity] GO:0016757 [transferase activity, transferring glycosyl groups] GO:0003825 [alpha,alpha-trehalose-phosphate synthase (UD | collinear gene           |
| 275000 | 276000 | E=1.7e-119 | At4g17770.1 | FCAALL.9, glycosyl transferase family 20 protein / trehalose-phosphatase family protein, GO:0005992 [trehalose biosynthesis]<br>GO:0004805 [trehalose-phosphatase activity] GO:0016757 [transferase activity, transferring glycosyl groups] GO:0003825 [alpha,alpha-trehalose-phosphate synthase (UD                                                                                                                                                                                                                                            | Conserved collinear gene |
| 275500 | 276500 | E=9.3e-152 | At4g17770.1 | FCAALL.9, glycosyl transferase family 20 protein / trehalose-phosphatase family protein, GO:0005992 [trehalose biosynthesis]<br>GO:0004805 [trehalose-phosphatase activity] GO:0016757 [transferase activity, transferring glycosyl groups] GO:0003825 [alpha,alpha-trehalose-phosphate synthase (UD                                                                                                                                                                                                                                            | Conserved collinear gene |
| 276000 | 277000 | E=5.5e-159 | At4g17770.1 | FCAALL.9, glycosyl transferase family 20 protein / trehalose-phosphatase family protein, GO:0005992 [trehalose biosynthesis]<br>GO:0004805 [trehalose-phosphatase activity] GO:0016757 [transferase activity, transferring glycosyl groups] GO:0003825 [alpha,alpha-trehalose-phosphate synthase (UD                                                                                                                                                                                                                                            | Conserved collinear gene |
| 276500 | 277500 | E=6.0e-108 | At4g17770.1 | FCAALL.9, glycosyl transferase family 20 protein / trehalose-phosphatase family protein, GO:0005992 [trehalose biosynthesis]<br>GO:0004805 [trehalose-phosphatase activity] GO:0016757 [transferase activity, transferring glycosyl groups] GO:0003825 [alpha,alpha-trehalose-phosphate synthase (UD                                                                                                                                                                                                                                            | Conserved collinear gene |
| 277000 | 278000 | E=3.5e-74  | At4g17770.1 | FCAALL.9, glycosyl transferase family 20 protein / trehalose-phosphatase family protein, GO:0005992 [trehalose biosynthesis]<br>GO:0004805 [trehalose-phosphatase activity] GO:0016757 [transferase activity, transferring glycosyl groups] GO:0003825 [alpha,alpha-trehalose-phosphate synthase (UD                                                                                                                                                                                                                                            | Conserved collinear gene |
| 277500 | 278500 | E=2.0e-97  | At4g17770.1 | FCAALL.9, glycosyl transferase family 20 protein / trehalose-phosphatase family protein, GO:0005992 [trehalose biosynthesis]<br>GO:0004805 [trehalose-phosphatase activity] GO:0016757 [transferase activity, transferring glycosyl groups] GO:0003825 [alpha,alpha-trehalose-phosphate synthase (UD                                                                                                                                                                                                                                            | Conserved collinear gene |
| 278000 | 279000 | E=2.2e-46  | At2g43440.1 | T1O24.18, F-box family protein, GO:0000004 [biological_process unknown] GO:0008372 [cellular_component unknown] GO:0005554 [molecular_function unknown]                                                                                                                                                                                                                                                                                                                                                                                         | Conserved collinear gene |
| 278500 | 279500 | E=4.8e-86  | At2g43260.1 | F14B2.20, F-box family protein / S locus-related, GO:0000004 [biological_process unknown] GO:0008372 [cellular_component unknown] GO:0005554 [molecular_function unknown]                                                                                                                                                                                                                                                                                                                                                                       | Conserved collinear gene |
| 279000 | 280000 | E=5.6e-    | At4g17780.1 | FCAALL.161, F-box family protein, GO:0005554 [molecular_function                                                                                                                                                                                                                                                                                                                                                                                                                                                                                | Conserved                |



|        |        |           |             |                                                                                                                                                                                  |                                                            |
|--------|--------|-----------|-------------|----------------------------------------------------------------------------------------------------------------------------------------------------------------------------------|------------------------------------------------------------|
|        |        | 62        |             | unknown]                                                                                                                                                                         | collinear gene                                             |
| 279500 | 280500 | E=6.7e-14 | At4g17785.1 | FCAALL.109, myb family transcription factor (MYB39), GO:0003677 [DNA binding] GO:0006355 [regulation of transcription, DNA-dependent] GO:0003700 [transcription factor activity] | Conserved collinear gene                                   |
| 280000 | 281000 | E=7.0e-83 | At4g17785.1 | FCAALL.109, myb family transcription factor (MYB39), GO:0003677 [DNA binding] GO:0006355 [regulation of transcription, DNA-dependent] GO:0003700 [transcription factor activity] | Conserved collinear gene                                   |
| 280500 | 281500 | E=2.1e-85 | At4g17785.1 | FCAALL.109, myb family transcription factor (MYB39), GO:0003677 [DNA binding] GO:0006355 [regulation of transcription, DNA-dependent] GO:0003700 [transcription factor activity] | Conserved collinear gene                                   |
| 281000 | 282000 | E=4.0e-66 | At4g17785.1 | FCAALL.109, myb family transcription factor (MYB39), GO:0003677 [DNA binding] GO:0006355 [regulation of transcription, DNA-dependent] GO:0003700 [transcription factor activity] | Conserved collinear gene                                   |
| 281500 | 282500 | E=1.6e-44 | At4g17785.1 | FCAALL.109, myb family transcription factor (MYB39), GO:0003677 [DNA binding] GO:0006355 [regulation of transcription, DNA-dependent] GO:0003700 [transcription factor activity] | Conserved collinear gene<br>Inserted fragment within model |
| 290500 | 291500 | E=9.5e-10 | At2g07070.1 | T25N22.2, AT hook motif-containing protein, GO:0003677 [DNA binding]                                                                                                             | Inserted fragment within model                             |
| 291000 | 292000 | E=9.5e-10 | At2g07070.1 | T25N22.2, AT hook motif-containing protein, GO:0003677 [DNA binding]                                                                                                             | Inserted fragment within model                             |
| 292000 | 293000 | E=2.0e-22 | At2g06820.1 | T14A4.2, expressed protein, GO:0005554 [molecular_function unknown]                                                                                                              | Inserted fragment within model                             |
| 292500 | 293500 | E=4.4e-27 | At2g06820.1 | T14A4.2, expressed protein, GO:0005554 [molecular_function unknown]                                                                                                              | Inserted fragment within model                             |
| 300500 | 301500 | E=8.9e-32 | At4g17790.1 | FCAALL.62, expressed protein, GO:0005554 [molecular_function unknown]                                                                                                            | Conserved collinear gene                                   |
| 301000 | 302000 | E=2.8e-52 | At4g17790.1 | FCAALL.62, expressed protein, GO:0005554 [molecular_function unknown]                                                                                                            | Conserved collinear gene                                   |
| 301500 | 302500 | E=1.5e-14 | At4g17790.1 | FCAALL.62, expressed protein, GO:0005554 [molecular_function unknown]                                                                                                            | Conserved collinear gene<br>Inserted fragment              |
| 305000 | 306000 | E=2.7e-09 | At3g29220.1 | MXO21.7, hypothetical protein, GO:0005554 [molecular_function unknown]                                                                                                           | outside gene models                                        |
| 305500 | 306500 | E=5.4e-07 | At3g29220.1 | MXO21.7, hypothetical protein, GO:0005554 [molecular_function unknown]                                                                                                           | Inserted fragment<br>outside gene                          |

|        |        |            |             |                                                                                                                                                                |                                                     |
|--------|--------|------------|-------------|----------------------------------------------------------------------------------------------------------------------------------------------------------------|-----------------------------------------------------|
| 307500 | 308500 | E=4.6e-30  | At4g17790.1 | FCAALL.62, expressed protein, GO:0005554 [molecular_function unknown]                                                                                          | models<br>Conserved<br>collinear gene               |
| 308000 | 309000 | E=4.6e-30  | At4g17790.1 | FCAALL.62, expressed protein, GO:0005554 [molecular_function unknown]                                                                                          | Conserved<br>collinear gene                         |
| 312000 | 313000 | E=5.9e-96  | At4g17800.1 | FCAALL.129, DNA-binding protein-related, GO:0005554 [molecular_function unknown]                                                                               | Conserved<br>collinear gene                         |
| 312500 | 313500 | E=4.2e-158 | At4g17800.1 | FCAALL.129, DNA-binding protein-related, GO:0005554 [molecular_function unknown]                                                                               | Conserved<br>collinear gene                         |
| 313000 | 314000 | E=4.8e-61  | At4g17800.1 | FCAALL.129, DNA-binding protein-related, GO:0005554 [molecular_function unknown]                                                                               | Conserved<br>collinear gene<br>Inserted<br>fragment |
| 325500 | 326500 | E=2.2e-07  | At2g31700.1 | T9H9.22, hypothetical protein, GO:0005554 [molecular_function unknown]                                                                                         | outside gene<br>models<br>Inserted<br>fragment      |
| 326000 | 327000 | E=2.2e-07  | At2g31700.1 | T9H9.22, hypothetical protein, GO:0005554 [molecular_function unknown]                                                                                         | outside gene<br>models                              |
| 328500 | 329500 | E=3.1e-54  | At5g32621.1 | F15I15.2, expressed protein, GO:0005554 [molecular_function unknown] GO:0000004 [biological_process unknown] GO:0008372 [cellular_component unknown]           | Inserted<br>fragment<br>within model                |
| 329000 | 330000 | E=6.9e-103 | At3g15310.1 | K7L4.11, expressed protein, GO:0000004 [biological_process unknown] GO:0008372 [cellular_component unknown] GO:0005554 [molecular_function unknown]            | Inserted<br>fragment<br>within model                |
| 329500 | 330500 | E=6.4e-48  | At3g15310.1 | K7L4.11, expressed protein, GO:0000004 [biological_process unknown] GO:0008372 [cellular_component unknown] GO:0005554 [molecular_function unknown]            | Inserted<br>fragment<br>within model                |
| 331000 | 332000 | E=3.9e-18  | At3g15320.1 | K7L4.12, hypothetical protein, GO:0005554 [molecular_function unknown]                                                                                         | Inserted<br>fragment<br>within model                |
| 331500 | 332500 | E=1.4e-23  | At3g15320.1 | K7L4.12, hypothetical protein, GO:0005554 [molecular_function unknown]                                                                                         | Inserted<br>fragment<br>within model                |
| 334000 | 335000 | E=3.6e-59  | At4g17810.1 | FCAALL.130, zinc finger (C2H2 type) family protein, GO:0003676 [nucleic acid binding] GO:0008270 [zinc ion binding] GO:0003700 [transcription factor activity] | Conserved<br>collinear gene                         |
| 334500 | 335500 | E=3.9e-82  | At4g17810.1 | FCAALL.130, zinc finger (C2H2 type) family protein, GO:0003676 [nucleic acid binding] GO:0008270 [zinc ion binding] GO:0003700 [transcription factor activity] | Conserved<br>collinear gene                         |
| 335000 | 336000 | E=3.1e-    | At4g17810.1 | FCAALL.130, zinc finger (C2H2 type) family protein, GO:0003676                                                                                                 | Conserved                                           |

|        |        |            |             |                                                                                                                                       |                             |
|--------|--------|------------|-------------|---------------------------------------------------------------------------------------------------------------------------------------|-----------------------------|
|        |        | 20         |             | [nucleic acid binding] GO:0008270 [zinc ion binding] GO:0003700<br>[transcription factor activity]                                    | collinear gene              |
| 343500 | 344500 | E=4.9e-48  | At4g17830.1 | FCAALL.133, peptidase M20/M25/M40 family protein, GO:0008237<br>[metallopeptidase activity] GO:0006508 [proteolysis and peptidolysis] | Conserved<br>collinear gene |
| 344000 | 345000 | E=2.3e-109 | At4g17830.1 | FCAALL.133, peptidase M20/M25/M40 family protein, GO:0008237<br>[metallopeptidase activity] GO:0006508 [proteolysis and peptidolysis] | Conserved<br>collinear gene |
| 344500 | 345500 | E=1.5e-79  | At4g17830.1 | FCAALL.133, peptidase M20/M25/M40 family protein, GO:0008237<br>[metallopeptidase activity] GO:0006508 [proteolysis and peptidolysis] | Conserved<br>collinear gene |
| 345000 | 346000 | E=1.8e-84  | At4g17830.1 | FCAALL.133, peptidase M20/M25/M40 family protein, GO:0008237<br>[metallopeptidase activity] GO:0006508 [proteolysis and peptidolysis] | Conserved<br>collinear gene |
| 345500 | 346500 | E=3.7e-60  | At4g17830.1 | FCAALL.133, peptidase M20/M25/M40 family protein, GO:0008237<br>[metallopeptidase activity] GO:0006508 [proteolysis and peptidolysis] | Conserved<br>collinear gene |
| 346000 | 347000 | E=2.2e-53  | At4g17840.1 | T6K21.20, expressed protein, GO:0005554 [molecular_function<br>unknown]                                                               | Conserved<br>collinear gene |
| 346500 | 347500 | E=1.2e-68  | At4g17840.1 | T6K21.20, expressed protein, GO:0005554 [molecular_function<br>unknown]                                                               | Conserved<br>collinear gene |
| 347000 | 348000 | E=1.3e-79  | At4g17840.1 | T6K21.20, expressed protein, GO:0005554 [molecular_function<br>unknown]                                                               | Conserved<br>collinear gene |
| 347500 | 348500 | E=1.7e-26  | At4g17840.1 | T6K21.20, expressed protein, GO:0005554 [molecular_function<br>unknown]                                                               | Conserved<br>collinear gene |
| 348000 | 349000 | E=6.1e-63  | At4g17870.1 | T6K21.50, expressed protein, GO:0005554 [molecular_function<br>unknown]                                                               | Conserved<br>collinear gene |
| 348500 | 349500 | E=5.7e-86  | At4g17870.1 | T6K21.50, expressed protein, GO:0005554 [molecular_function<br>unknown]                                                               | Conserved<br>collinear gene |
| 349000 | 350000 | E=4.0e-18  | At4g17870.1 | T6K21.50, expressed protein, GO:0005554 [molecular_function<br>unknown]                                                               | Conserved<br>collinear gene |

CONTIG E

| Start | Stop | Score      | BLASTn hit  | Description                                                                                                                                                  | Classification                           |
|-------|------|------------|-------------|--------------------------------------------------------------------------------------------------------------------------------------------------------------|------------------------------------------|
| 0     | 1000 | E=4.5e-73  | At4g17380.1 | FCAALL.423, DNA mismatch repair MutS family protein, GO:0005524<br>[ATP binding] GO:0006298 [mismatch repair] GO:0003684 [damaged<br>DNA binding]            | fragment only                            |
| 500   | 1500 | E=1.3e-33  | At4g17380.1 | FCAALL.423, DNA mismatch repair MutS family protein, GO:0005524<br>[ATP binding] GO:0006298 [mismatch repair] GO:0003684 [damaged<br>DNA binding]            | fragment only                            |
| 1000  | 2000 | E=4.5e-72  | At4g17390.1 | FCAALL.32, 60S ribosomal protein L15 (RPL15B), GO:0005840<br>[ribosome] GO:0006412 [protein biosynthesis] GO:0003735 [structural<br>constituent of ribosome] | Additional<br>collinear gene<br>fragment |
| 1500  | 2500 | E=6.3e-104 | At4g17390.1 | FCAALL.32, 60S ribosomal protein L15 (RPL15B), GO:0005840<br>[ribosome] GO:0006412 [protein biosynthesis] GO:0003735 [structural                             | Additional<br>collinear gene             |

|       |       |           |             |                                                                                                                                                                                          |                                                                                                                                                                                        |
|-------|-------|-----------|-------------|------------------------------------------------------------------------------------------------------------------------------------------------------------------------------------------|----------------------------------------------------------------------------------------------------------------------------------------------------------------------------------------|
| 2000  | 3000  | E=3.5e-40 | At4g17390.1 | constituent of ribosome]<br>FCAALL.32, 60S ribosomal protein L15 (RPL15B), GO:0005840<br>[ribosome] GO:0006412 [protein biosynthesis] GO:0003735 [structural<br>constituent of ribosome] | fragment<br>Additional<br>collinear gene<br>fragment<br>Inserted<br>fragment<br>outside gene<br>models<br>Inserted<br>fragment<br>within model<br>Inserted<br>fragment<br>within model |
| 6000  | 7000  | E=3.2e-19 | At1g02230.1 | T7I23.19, no apical meristem (NAM) family protein, GO:0007275<br>[development] GO:0005554 [molecular_function unknown] GO:0003700<br>[transcription factor activity]                     | fragment<br>outside gene<br>models<br>Inserted<br>fragment<br>within model<br>Inserted<br>fragment<br>within model                                                                     |
| 6500  | 7500  | E=2.9e-26 | At1g26860.1 | T2P11.5, hypothetical protein, GO:0005554 [molecular_function<br>unknown]                                                                                                                | fragment<br>within model<br>Inserted<br>fragment<br>within model                                                                                                                       |
| 7000  | 8000  | E=6.2e-11 | At1g26860.1 | T2P11.5, hypothetical protein, GO:0005554 [molecular_function<br>unknown]                                                                                                                | fragment<br>within model                                                                                                                                                               |
| 23000 | 24000 | E=1.5e-42 | At4g17380.1 | FCAALL.423, DNA mismatch repair MutS family protein, GO:0005524<br>[ATP binding] GO:0006298 [mismatch repair] GO:0003684 [damaged<br>DNA binding]                                        | Conserved<br>collinear gene                                                                                                                                                            |
| 23500 | 24500 | E=2.6e-64 | At4g17380.1 | FCAALL.423, DNA mismatch repair MutS family protein, GO:0005524<br>[ATP binding] GO:0006298 [mismatch repair] GO:0003684 [damaged<br>DNA binding]                                        | Conserved<br>collinear gene                                                                                                                                                            |
| 24000 | 25000 | E=5.9e-13 | At4g17380.1 | FCAALL.423, DNA mismatch repair MutS family protein, GO:0005524<br>[ATP binding] GO:0006298 [mismatch repair] GO:0003684 [damaged<br>DNA binding]                                        | Conserved<br>collinear gene                                                                                                                                                            |
| 34500 | 35500 | E=2.4e-38 | At3g29785.1 | T2G12.25, hypothetical protein, GO:0005554 [molecular_function<br>unknown]                                                                                                               | Predicted<br>transposon                                                                                                                                                                |
| 35000 | 36000 | E=2.4e-38 | At3g29785.1 | T2G12.25, hypothetical protein, GO:0005554 [molecular_function<br>unknown]                                                                                                               | Predicted<br>transposon                                                                                                                                                                |
| 37000 | 38000 | E=3.8e-10 | At4g23160.1 | F21P8.50, protein kinase family protein, GO:0016301 [kinase activity]                                                                                                                    | Predicted<br>transposon                                                                                                                                                                |
| 37500 | 38500 | E=3.8e-10 | At4g23160.1 | F21P8.50, protein kinase family protein, GO:0016301 [kinase activity]                                                                                                                    | Predicted<br>transposon<br>Inserted<br>fragment<br>outside gene<br>models<br>Inserted<br>fragment<br>outside gene<br>models                                                            |
| 40000 | 41000 | E=1.8e-16 | At1g55790.1 | F14J16.3, hypothetical protein, GO:0005554 [molecular_function<br>unknown]                                                                                                               | Inserted<br>fragment<br>outside gene<br>models<br>Inserted<br>fragment<br>outside gene<br>models                                                                                       |
| 40500 | 41500 | E=6.8e-14 | At1g05160.1 | YUP8H12.23, ent-kaurenoic acid hydroxylase (KAO1) / cytochrome<br>P450 88A3, putative (CYP88A3), GO:0015034 [cytochrome P450<br>activity] GO:0019825 [oxygen binding]                    | Inserted<br>fragment<br>outside gene<br>models                                                                                                                                         |
| 41000 | 42000 | E=3.5e-13 | At1g05160.1 | YUP8H12.23, ent-kaurenoic acid hydroxylase (KAO1) / cytochrome<br>P450 88A3, putative (CYP88A3), GO:0015034 [cytochrome P450                                                             | Inserted<br>fragment                                                                                                                                                                   |

|       |       |           |             |                                                                                                                               |                                       |
|-------|-------|-----------|-------------|-------------------------------------------------------------------------------------------------------------------------------|---------------------------------------|
|       |       |           |             | activity] GO:0019825 [oxygen binding]                                                                                         | outside gene models                   |
| 48500 | 49500 | E=4.5e-23 | At2g27780.1 | F15K20.12, expressed protein, GO:0005554 [molecular_function unknown]                                                         | Predicted transposon                  |
| 49000 | 50000 | E=3.6e-40 | At2g27780.1 | F15K20.12, expressed protein, GO:0005554 [molecular_function unknown]                                                         | Predicted transposon                  |
| 49500 | 50500 | E=1.1e-19 | At2g13640.1 | T10F5.18, Golgi GDP mannose transporter (GONST1), GO:0005554 [molecular_function unknown]                                     | Inserted fragment within model        |
| 50500 | 51500 | E=9.6e-12 | At1g14750.1 | F10B6.15, cyclin, putative (SDS), GO:0000074 [regulation of cell cycle] GO:0004693 [cyclin-dependent protein kinase activity] | Inserted fragment outside gene models |
| 51000 | 52000 | E=9.6e-12 | At1g14750.1 | F10B6.15, cyclin, putative (SDS), GO:0000074 [regulation of cell cycle] GO:0004693 [cyclin-dependent protein kinase activity] | Inserted fragment outside gene models |
| 52500 | 53500 | E=4.7e-15 | At5g63740.1 | MBK5.22, zinc finger protein-related, GO:0005554 [molecular_function unknown]                                                 | Predicted transposon                  |
| 53000 | 54000 | E=2.2e-14 | At5g63740.1 | MBK5.22, zinc finger protein-related, GO:0005554 [molecular_function unknown]                                                 | Predicted transposon                  |
| 61500 | 62500 | E=1.6e-23 | At2g27780.1 | F15K20.12, expressed protein, GO:0005554 [molecular_function unknown]                                                         | Predicted transposon                  |
| 62000 | 63000 | E=8.1e-43 | At2g27780.1 | F15K20.12, expressed protein, GO:0005554 [molecular_function unknown]                                                         | Predicted transposon                  |
| 62500 | 63500 | E=1.5e-18 | At2g13640.1 | T10F5.18, Golgi GDP mannose transporter (GONST1), GO:0005554 [molecular_function unknown]                                     | Inserted fragment within model        |
| 63500 | 64500 | E=9.6e-12 | At1g14750.1 | F10B6.15, cyclin, putative (SDS), GO:0000074 [regulation of cell cycle] GO:0004693 [cyclin-dependent protein kinase activity] | Inserted fragment outside gene models |
| 64000 | 65000 | E=2.5e-09 | At1g14750.1 | F10B6.15, cyclin, putative (SDS), GO:0000074 [regulation of cell cycle] GO:0004693 [cyclin-dependent protein kinase activity] | Inserted fragment outside gene models |
| 65500 | 66500 | E=2.7e-08 | At1g48400.1 | F11A17.5, F-box family protein, GO:0005554 [molecular_function unknown]                                                       | Predicted transposon                  |
| 66000 | 67000 | E=6.9e-16 | At5g63740.1 | MBK5.22, zinc finger protein-related, GO:0005554 [molecular_function unknown]                                                 | Predicted transposon                  |
| 73000 | 74000 | E=3.1e-   | At5g63740.1 | MBK5.22, zinc finger protein-related, GO:0005554 [molecular_function unknown]                                                 | Inserted                              |

|        |        |           |             |                                                                                  |  |                                                |
|--------|--------|-----------|-------------|----------------------------------------------------------------------------------|--|------------------------------------------------|
|        |        | 14        |             | unknown]                                                                         |  | fragment<br>within model                       |
| 73500  | 74500  | E=6.9e-08 | At5g63740.1 | MBK5.22, zinc finger protein-related, GO:0005554 [molecular_function<br>unknown] |  | Inserted<br>fragment<br>within model           |
| 86500  | 87500  | E=1.7e-12 | At5g47225.1 | MQL5.8, hypothetical protein, GO:0005554 [molecular_function<br>unknown]         |  | Inserted<br>fragment<br>within model           |
| 87000  | 88000  | E=4.7e-13 | At5g47225.1 | MQL5.8, hypothetical protein, GO:0005554 [molecular_function<br>unknown]         |  | Inserted<br>fragment<br>within model           |
| 90000  | 91000  | E=3.7e-16 | At3g30240.1 | MIL15.14, hypothetical protein, GO:0005554 [molecular_function<br>unknown]       |  | Predicted<br>transposon                        |
| 90500  | 91500  | E=1.6e-11 | At3g30240.1 | MIL15.14, hypothetical protein, GO:0005554 [molecular_function<br>unknown]       |  | Predicted<br>transposon                        |
| 98000  | 99000  | E=5.7e-23 | At2g07190.1 | T25N22.15, hypothetical protein, GO:0005554 [molecular_function<br>unknown]      |  | Inserted<br>fragment<br>within model           |
| 101000 | 102000 | E=9.1e-16 | At3g43770.1 | T28A8.60, hypothetical protein, GO:0005554 [molecular_function<br>unknown]       |  | Predicted<br>transposon                        |
| 101500 | 102500 | E=2.6e-16 | At3g43770.1 | T28A8.60, hypothetical protein, GO:0005554 [molecular_function<br>unknown]       |  | Predicted<br>transposon                        |
| 106500 | 107500 | E=1.1e-23 | At1g21330.1 | F24J8.25, hypothetical protein, GO:0005554 [molecular_function<br>unknown]       |  | Inserted<br>fragment<br>outside gene<br>models |
| 107000 | 108000 | E=2.4e-33 | At3g24255.1 | K13K6.3, expressed protein, GO:0005554 [molecular_function<br>unknown]           |  | Inserted<br>fragment<br>within model           |
| 107500 | 108500 | E=8.5e-12 | At3g24255.1 | K13K6.3, expressed protein, GO:0005554 [molecular_function<br>unknown]           |  | Inserted<br>fragment<br>within model           |
| 110500 | 111500 | E=6.8e-09 | At5g33200.1 | T29A4.10, hypothetical protein, GO:0005554 [molecular_function<br>unknown]       |  | Inserted<br>fragment<br>outside gene<br>models |
| 111000 | 112000 | E=6.8e-09 | At5g33200.1 | T29A4.10, hypothetical protein, GO:0005554 [molecular_function<br>unknown]       |  | Inserted<br>fragment<br>outside gene<br>models |
| 116500 | 117500 | E=3.8e-   | At1g41860.1 | F5A13.6, hypothetical protein, GO:0005554 [molecular_function                    |  | Predicted                                      |

|        |        |               |             |                                                                                                                  |                                                                                                                |
|--------|--------|---------------|-------------|------------------------------------------------------------------------------------------------------------------|----------------------------------------------------------------------------------------------------------------|
|        |        | 10            |             | unknown]                                                                                                         | transposon<br>Inserted<br>fragment<br>outside gene<br>models<br>Inserted<br>fragment<br>outside gene<br>models |
| 135500 | 136500 | E=9.3e-<br>22 | At4g31130.1 | F6E21.50, expressed protein, GO:0005554 [molecular_function<br>unknown]                                          | Inserted<br>fragment<br>outside gene<br>models<br>Inserted<br>fragment<br>outside gene<br>models               |
| 136000 | 137000 | E=5.4e-<br>15 | At4g31130.1 | F6E21.50, expressed protein, GO:0005554 [molecular_function<br>unknown]                                          | Inserted<br>fragment<br>outside gene<br>models<br>Predicted<br>transposon                                      |
| 143000 | 144000 | E=3.9e-<br>12 | At2g05950.1 | T6P5.15, hypothetical protein, GO:0005554 [molecular_function<br>unknown]                                        | Predicted<br>transposon                                                                                        |
| 143500 | 144500 | E=3.9e-<br>12 | At2g05950.1 | T6P5.15, hypothetical protein, GO:0005554 [molecular_function<br>unknown]                                        | Predicted<br>transposon<br>Inserted<br>fragment<br>outside gene<br>models                                      |
| 145000 | 146000 | E=4.2e-<br>13 | At2g20595.1 | F23N11.19, expressed protein, GO:0005554 [molecular_function<br>unknown]                                         | Inserted<br>fragment<br>outside gene<br>models<br>Inserted<br>fragment<br>outside gene<br>models               |
| 145500 | 146500 | E=4.2e-<br>13 | At2g20595.1 | F23N11.19, expressed protein, GO:0005554 [molecular_function<br>unknown]                                         | Inserted<br>fragment<br>outside gene<br>models                                                                 |
| 146000 | 147000 | E=3.4e-<br>12 | At3g43770.1 | T28A8.60, hypothetical protein, GO:0005554 [molecular_function<br>unknown]                                       | Predicted<br>transposon                                                                                        |
| 146500 | 147500 | E=1.6e-<br>18 | At3g43770.1 | T28A8.60, hypothetical protein, GO:0005554 [molecular_function<br>unknown]                                       | Predicted<br>transposon                                                                                        |
| 147000 | 148000 | E=9.4e-<br>18 | At4g23160.1 | F21P8.50, protein kinase family protein, GO:0016301 [kinase activity]                                            | Predicted<br>transposon                                                                                        |
| 147500 | 148500 | E=2.1e-<br>27 | At4g23160.1 | F21P8.50, protein kinase family protein, GO:0016301 [kinase activity]                                            | Predicted<br>transposon                                                                                        |
| 148000 | 149000 | E=1.8e-<br>15 | At4g23160.1 | F21P8.50, protein kinase family protein, GO:0016301 [kinase activity]                                            | Predicted<br>transposon                                                                                        |
| 151500 | 152500 | E=6.2e-<br>09 | At4g17483.1 | FCAALL.16, palmitoyl protein thioesterase family protein, GO:0008474<br>[palmitoyl-(protein) hydrolase activity] | Conserved<br>collinear gene                                                                                    |
| 152000 | 153000 | E=2.0e-<br>33 | At4g17483.1 | FCAALL.16, palmitoyl protein thioesterase family protein, GO:0008474<br>[palmitoyl-(protein) hydrolase activity] | Conserved<br>collinear gene                                                                                    |
| 152500 | 153500 | E=2.8e-<br>66 | At4g17470.1 | FCAALL.11, palmitoyl protein thioesterase family protein, GO:0008474<br>[palmitoyl-(protein) hydrolase activity] | Conserved<br>collinear gene                                                                                    |
| 153000 | 154000 | E=2.9e-<br>60 | At4g17483.1 | FCAALL.16, palmitoyl protein thioesterase family protein, GO:0008474<br>[palmitoyl-(protein) hydrolase activity] | Conserved<br>collinear gene                                                                                    |
| 153500 | 154500 | E=2.0e-<br>08 | At4g17483.1 | FCAALL.16, palmitoyl protein thioesterase family protein, GO:0008474<br>[palmitoyl-(protein) hydrolase activity] | Conserved<br>collinear gene                                                                                    |

|        |        |           |             |                                                                                                                                                                                                                                                                                           |                          |
|--------|--------|-----------|-------------|-------------------------------------------------------------------------------------------------------------------------------------------------------------------------------------------------------------------------------------------------------------------------------------------|--------------------------|
| 154000 | 155000 | E=1.0e-37 | At4g17486.1 | FCAALL.234, expressed protein, GO:0005554 [molecular_function unknown]                                                                                                                                                                                                                    | Conserved collinear gene |
| 154500 | 155500 | E=5.6e-91 | At4g17486.1 | FCAALL.234, expressed protein, GO:0005554 [molecular_function unknown]                                                                                                                                                                                                                    | Conserved collinear gene |
| 155000 | 156000 | E=2.1e-50 | At4g17486.1 | FCAALL.234, expressed protein, GO:0005554 [molecular_function unknown]                                                                                                                                                                                                                    | Conserved collinear gene |
| 155500 | 156500 | E=4.4e-22 | At4g17486.1 | FCAALL.234, expressed protein, GO:0005554 [molecular_function unknown]                                                                                                                                                                                                                    | Conserved collinear gene |
| 157000 | 158000 | E=9.3e-19 | At4g17490.1 | FCAALL.120, ethylene-responsive element-binding protein, putative, GO:0005634 [nucleus] GO:0003677 [DNA binding] GO:0006355 [regulation of transcription, DNA-dependent] GO:0003700 [transcription factor activity]                                                                       | Conserved collinear gene |
| 157500 | 158500 | E=1.0e-55 | At5g47230.1 | MQL5.9, ethylene-responsive element-binding factor 5 (ERF5), GO:0005634 [nucleus] GO:0003677 [DNA binding] GO:0006355 [regulation of transcription, DNA-dependent] GO:0016563 [transcriptional activator activity] GO:0003700 [transcription factor activity]                             | Conserved collinear gene |
| 158000 | 159000 | E=5.5e-46 | At4g17490.1 | FCAALL.120, ethylene-responsive element-binding protein, putative, GO:0005634 [nucleus] GO:0003677 [DNA binding] GO:0006355 [regulation of transcription, DNA-dependent] GO:0003700 [transcription factor activity]                                                                       | Conserved collinear gene |
| 158500 | 159500 | E=6.8e-08 | At4g17490.1 | FCAALL.120, ethylene-responsive element-binding protein, putative, GO:0005634 [nucleus] GO:0003677 [DNA binding] GO:0006355 [regulation of transcription, DNA-dependent] GO:0003700 [transcription factor activity]                                                                       | Conserved collinear gene |
| 165000 | 166000 | E=2.9e-07 | At4g11710.1 | T5C23.140, hypothetical protein, GO:0005554 [molecular_function unknown]                                                                                                                                                                                                                  | Predicted transposon     |
| 165500 | 166500 | E=3.9e-08 | At4g11710.1 | T5C23.140, hypothetical protein, GO:0005554 [molecular_function unknown]                                                                                                                                                                                                                  | Predicted transposon     |
| 166000 | 167000 | E=5.4e-12 | At1g43730.1 | F2J6.21, hypothetical protein, GO:0005554 [molecular_function unknown]                                                                                                                                                                                                                    | Predicted transposon     |
| 166500 | 167500 | E=6.5e-10 | At1g43730.1 | F2J6.21, hypothetical protein, GO:0005554 [molecular_function unknown]                                                                                                                                                                                                                    | Predicted transposon     |
| 183500 | 184500 | E=2.1e-09 | At4g17500.1 | FCAALL.123, ethylene-responsive element-binding protein 1 (ERF1) / EREBP-2 protein, GO:0005643 [nuclear pore] GO:0003677 [DNA binding] GO:0006355 [regulation of transcription, DNA-dependent] GO:0016563 [transcriptional activator activity] GO:0003700 [transcription factor activity] | Conserved collinear gene |
| 184000 | 185000 | E=3.2e-63 | At5g47220.1 | MQL5.7, ethylene-responsive element-binding factor 2 (ERF2), GO:0003677 [DNA binding] GO:0045941 [positive regulation of transcription] GO:0006355 [regulation of transcription, DNA-dependent]                                                                                           | Conserved collinear gene |



|        |        |           |             |                                                                                                                                                                                                                                                                                                                                                                |                                       |
|--------|--------|-----------|-------------|----------------------------------------------------------------------------------------------------------------------------------------------------------------------------------------------------------------------------------------------------------------------------------------------------------------------------------------------------------------|---------------------------------------|
| 184500 | 185500 | E=9.7e-51 | At4g17500.1 | GO:0016563 [transcriptional activator activity] GO:0008372 [cellular_FCAALL.123, ethylene-responsive element-binding protein 1 (ERF1) / EREBP-2 protein, GO:0005643 [nuclear pore] GO:0003677 [DNA binding] GO:0006355 [regulation of transcription, DNA-dependent] GO:0016563 [transcriptional activator activity] GO:0003700 [transcription factor activity] | Conserved collinear gene              |
| 185500 | 186500 | E=4.8e-06 | At1g56660.1 | F25P12.91, expressed protein, GO:0005554 [molecular_function unknown]                                                                                                                                                                                                                                                                                          | Predicted transposon                  |
| 186500 | 187500 | E=1.9e-24 | At2g14570.1 | T13P21.5, SWIM zinc finger family protein, GO:0000004 [biological_process unknown] GO:0008372 [cellular_component unknown] GO:0005554 [molecular_function unknown]                                                                                                                                                                                             | Predicted transposon                  |
| 187000 | 188000 | E=1.5e-11 | At1g48290.1 | F11A17.26, expressed protein, GO:0005554 [molecular_function unknown]                                                                                                                                                                                                                                                                                          | Predicted transposon                  |
| 190000 | 191000 | E=1.4e-11 | At3g26660.1 | MLJ15.5, LOB domain protein, putative / lateral organ boundaries domain protein, putative (LBD24), GO:0005554 [molecular_function unknown]                                                                                                                                                                                                                     | Inserted fragment outside gene models |
| 190500 | 191500 | E=1.4e-11 | At3g26660.1 | MLJ15.5, LOB domain protein, putative / lateral organ boundaries domain protein, putative (LBD24), GO:0005554 [molecular_function unknown]                                                                                                                                                                                                                     | Inserted fragment outside gene models |
| 192000 | 193000 | E=5.9e-45 | At1g35940.1 | F10O5.11, AT hook motif-containing protein-related, GO:0000004 [biological_process unknown] GO:0008372 [cellular_component unknown] GO:0005554 [molecular_function unknown]                                                                                                                                                                                    | Inserted fragment within model        |
| 192500 | 193500 | E=3.6e-62 | At3g13250.1 | MDC11.18, hypothetical protein, GO:0005554 [molecular_function unknown]                                                                                                                                                                                                                                                                                        | Inserted fragment within model        |
| 193000 | 194000 | E=2.0e-71 | At1g52960.1 | F14G24.23, hypothetical protein, GO:0005554 [molecular_function unknown]                                                                                                                                                                                                                                                                                       | Inserted fragment within model        |
| 193500 | 194500 | E=2.7e-46 | At1g52960.1 | F14G24.23, hypothetical protein, GO:0005554 [molecular_function unknown]                                                                                                                                                                                                                                                                                       | Inserted fragment within model        |
| 195000 | 196000 | E=7.1e-33 | At3g42100.1 | F4M19.60, AT hook motif-containing protein-related, GO:0000004 [biological_process unknown] GO:0008372 [cellular_component unknown] GO:0005554 [molecular_function unknown]                                                                                                                                                                                    | Inserted fragment within model        |
| 195500 | 196500 | E=1.5e-54 | At3g42100.1 | F4M19.60, AT hook motif-containing protein-related, GO:0000004 [biological_process unknown] GO:0008372 [cellular_component unknown] GO:0005554 [molecular_function unknown]                                                                                                                                                                                    | Inserted fragment within model        |
| 196000 | 197000 | E=1.1e-50 | At3g30560.1 | MQP15.20, hypothetical protein, GO:0005554 [molecular_function unknown]                                                                                                                                                                                                                                                                                        | Inserted fragment                     |

|        |        |           |             |                                                                                                                                                                                                                                                                                                  |                                                      |
|--------|--------|-----------|-------------|--------------------------------------------------------------------------------------------------------------------------------------------------------------------------------------------------------------------------------------------------------------------------------------------------|------------------------------------------------------|
| 196500 | 197500 | E=5.5e-41 | At3g30560.1 | MQP15.20, hypothetical protein, GO:0005554 [molecular_function unknown]                                                                                                                                                                                                                          | within model<br>Inserted<br>fragment<br>within model |
| 197000 | 198000 | E=4.0e-22 | At5g37110.1 | MJG14.16, hypothetical protein, GO:0005554 [molecular_function unknown]                                                                                                                                                                                                                          | Inserted<br>fragment<br>within model                 |
| 209000 | 210000 | E=1.3e-12 | At5g32482.1 | T15F17.6, zinc knuckle (CCHC-type) family protein, GO:0003676 [nucleic acid binding]                                                                                                                                                                                                             | Predicted<br>transposon                              |
| 209500 | 210500 | E=6.6e-11 | At5g32482.1 | T15F17.6, zinc knuckle (CCHC-type) family protein, GO:0003676 [nucleic acid binding]                                                                                                                                                                                                             | Predicted<br>transposon                              |
| 212000 | 213000 | E=8.2e-09 | At4g23160.1 | F21P8.50, protein kinase family protein, GO:0016301 [kinase activity]                                                                                                                                                                                                                            | Predicted<br>transposon                              |
| 212500 | 213500 | E=8.2e-09 | At4g23160.1 | F21P8.50, protein kinase family protein, GO:0016301 [kinase activity]                                                                                                                                                                                                                            | Predicted<br>transposon                              |
| 215500 | 216500 | E=1.6e-06 | At5g56040.1 | MDA7.8, leucine-rich repeat protein kinase, putative, GO:0005524 [ATP binding] GO:0016301 [kinase activity] GO:0006468 [protein amino acid phosphorylation] GO:0008372 [cellular_component unknown] GO:0007169 [transmembrane receptor protein tyrosine kinase]                                  | outside gene<br>models<br>Inserted<br>fragment       |
| 216000 | 217000 | E=1.6e-06 | At5g56040.1 | MDA7.8, leucine-rich repeat protein kinase, putative, GO:0005524 [ATP binding] GO:0016301 [kinase activity] GO:0006468 [protein amino acid phosphorylation] GO:0008372 [cellular_component unknown] GO:0007169 [transmembrane receptor protein tyrosine kinase]                                  | outside gene<br>models<br>Inserted<br>fragment       |
| 216500 | 217500 | E=8.8e-20 | At5g19850.1 | T29J13.270, hydrolase, alpha/beta fold family protein, GO:0016787 [hydrolase activity]                                                                                                                                                                                                           | Inserted<br>fragment<br>within model                 |
| 217000 | 218000 | E=2.3e-16 | At5g19850.1 | T29J13.270, hydrolase, alpha/beta fold family protein, GO:0016787 [hydrolase activity]                                                                                                                                                                                                           | Inserted<br>fragment<br>within model                 |
| 218000 | 219000 | E=3.6e-09 | At1g50430.1 | F11F12.21, 7-dehydrocholesterol reductase / 7-DHC reductase / sterol delta-7-reductase (ST7R) / dwarf5 protein, GO:0016126 [sterol biosynthesis] GO:0030176 [integral to endoplasmic reticulum membrane] GO:0016132 [brassinosteroid biosynthesis] GO:0009918 [sterol delta7 reductase activity] | Inserted<br>fragment<br>outside gene<br>models       |
| 223500 | 224500 | E=4.8e-16 | At4g17520.1 | FCAALL.142, nuclear RNA-binding protein, putative, GO:0003723 [RNA binding]                                                                                                                                                                                                                      | Conserved<br>collinear gene                          |
| 224000 | 225000 | E=1.3e-57 | At4g17520.1 | FCAALL.142, nuclear RNA-binding protein, putative, GO:0003723 [RNA binding]                                                                                                                                                                                                                      | Conserved<br>collinear gene                          |
| 224500 | 225500 | E=2.2e-80 | At4g17520.1 | FCAALL.142, nuclear RNA-binding protein, putative, GO:0003723 [RNA binding]                                                                                                                                                                                                                      | Conserved<br>collinear gene                          |
| 225000 | 226000 | E=3.3e-09 | At4g17520.1 | FCAALL.142, nuclear RNA-binding protein, putative, GO:0003723                                                                                                                                                                                                                                    | Conserved                                            |

|        |        |         |             |                                                                    |  |                |
|--------|--------|---------|-------------|--------------------------------------------------------------------|--|----------------|
|        |        | 57      |             | [RNA binding]                                                      |  | collinear gene |
|        |        | E=2.3e- |             | FCAALL.87, Ras-related GTP-binding protein, putative, GO:0005525   |  | Conserved      |
| 225500 | 226500 | 13      | At4g17530.1 | [GTP binding]                                                      |  | collinear gene |
|        |        | E=1.7e- |             | MQL5.5, Ras-related GTP-binding protein, putative, GO:0005525 [GTP |  | Conserved      |
| 226000 | 227000 | 55      | At5g47200.1 | binding]                                                           |  | collinear gene |
|        |        | E=7.4e- |             | MQL5.5, Ras-related GTP-binding protein, putative, GO:0005525 [GTP |  | Conserved      |
| 226500 | 227500 | 76      | At5g47200.1 | binding]                                                           |  | collinear gene |
|        |        | E=7.2e- |             | MQL5.5, Ras-related GTP-binding protein, putative, GO:0005525 [GTP |  | Conserved      |
| 227000 | 228000 | 23      | At5g47200.1 | binding]                                                           |  | collinear gene |
|        |        | E=9.8e- |             | FCAALL.41, transporter-related, GO:0005351 [sugar porter activity] |  | Conserved      |
| 228000 | 229000 | 34      | At4g17550.1 | GO:0008643 [carbohydrate transport]                                |  | collinear gene |
|        |        | E=9.9e- |             | FCAALL.41, transporter-related, GO:0005351 [sugar porter activity] |  | Conserved      |
| 228500 | 229500 | 89      | At4g17550.1 | GO:0008643 [carbohydrate transport]                                |  | collinear gene |
|        |        | E=1.2e- |             | FCAALL.41, transporter-related, GO:0005351 [sugar porter activity] |  | Conserved      |
| 229000 | 230000 | 128     | At4g17550.1 | GO:0008643 [carbohydrate transport]                                |  | collinear gene |
|        |        | E=3.3e- |             | FCAALL.41, transporter-related, GO:0005351 [sugar porter activity] |  | Conserved      |
| 229500 | 230500 | 141     | At4g17550.1 | GO:0008643 [carbohydrate transport]                                |  | collinear gene |
|        |        | E=9.0e- |             | FCAALL.41, transporter-related, GO:0005351 [sugar porter activity] |  | Conserved      |
| 230000 | 231000 | 61      | At4g17550.1 | GO:0008643 [carbohydrate transport]                                |  | collinear gene |
|        |        | E=5.7e- |             | FCAALL.39, ribosomal protein L19 family protein, GO:0005840        |  | Conserved      |
| 230500 | 231500 | 26      | At4g17560.1 | [ribosome] GO:0007046 [ribosome biogenesis] GO:0006412 [protein    |  | collinear gene |
|        |        | E=3.8e- |             | biosynthesis] GO:0003735 [structural constituent of ribosome]      |  | Conserved      |
| 231000 | 232000 | 55      | At4g17560.1 | FCAALL.39, ribosomal protein L19 family protein, GO:0005840        |  | collinear gene |
|        |        | E=3.8e- |             | [ribosome] GO:0007046 [ribosome biogenesis] GO:0006412 [protein    |  | Conserved      |
| 231500 | 232500 | 50      | At5g47190.1 | biosynthesis] GO:0003735 [structural constituent of ribosome]      |  | collinear gene |
|        |        | E=6.2e- |             | GO:0007046 [ribosome biogenesis] GO:0006412 [protein biosynthesis] |  | Conserved      |
| 232000 | 233000 | 18      | At4g17560.1 | GO:0003735 [structural constituent of ribosome]                    |  | collinear gene |
|        |        | E=6.6e- |             | FCAALL.45, zinc finger (GATA type) family protein, GO:0003700      |  | Conserved      |
| 233000 | 234000 | 29      | At4g17570.1 | [transcription factor activity]                                    |  | collinear gene |
|        |        | E=7.5e- |             | FCAALL.45, zinc finger (GATA type) family protein, GO:0003700      |  | Conserved      |
| 233500 | 234500 | 77      | At4g17570.1 | [transcription factor activity]                                    |  | collinear gene |
|        |        | E=2.8e- |             | FCAALL.45, zinc finger (GATA type) family protein, GO:0003700      |  | Conserved      |
| 234000 | 235000 | 45      | At4g17570.1 | [transcription factor activity]                                    |  | collinear gene |
|        |        | E=9.0e- |             | FCAALL.45, zinc finger (GATA type) family protein, GO:0003700      |  | Conserved      |
| 234500 | 235500 | 112     | At4g17570.1 | [transcription factor activity]                                    |  | collinear gene |
|        |        | E=9.4e- |             | FCAALL.45, zinc finger (GATA type) family protein, GO:0003700      |  | Conserved      |
| 235000 | 236000 | 67      | At4g17570.1 | [transcription factor activity]                                    |  | collinear gene |

|        |        |           |             |                                                                                                                                                                                                           |                                       |
|--------|--------|-----------|-------------|-----------------------------------------------------------------------------------------------------------------------------------------------------------------------------------------------------------|---------------------------------------|
| 241500 | 242500 | E=1.2e-08 | At4g29090.1 | F25O24.5, reverse transcriptase, putative / RNA-dependent DNA polymerase, putative, GO:0003723 [RNA binding] GO:0003964 [RNA-directed DNA polymerase activity] GO:0006278 [RNA dependent DNA replication] | Predicted transposon                  |
| 242000 | 243000 | E=7.8e-07 | At4g29090.1 | F25O24.5, reverse transcriptase, putative / RNA-dependent DNA polymerase, putative, GO:0003723 [RNA binding] GO:0003964 [RNA-directed DNA polymerase activity] GO:0006278 [RNA dependent DNA replication] | Predicted transposon                  |
| 242500 | 243500 | E=1.5e-10 | At5g35805.1 | MIK22.10, hypothetical protein, GO:0005554 [molecular_function unknown]                                                                                                                                   | Predicted transposon                  |
| 243000 | 244000 | E=1.5e-10 | At5g35805.1 | MIK22.10, hypothetical protein, GO:0005554 [molecular_function unknown]                                                                                                                                   | Predicted transposon                  |
| 250000 | 251000 | E=6.1e-10 | At5g47580.1 | MNJ7.17, expressed protein, GO:0005554 [molecular_function unknown]                                                                                                                                       | Inserted fragment outside gene models |
| 250500 | 251500 | E=1.0e-22 | At5g47580.1 | MNJ7.17, expressed protein, GO:0005554 [molecular_function unknown]                                                                                                                                       | Inserted fragment outside gene models |
| 251000 | 252000 | E=7.0e-09 | At5g47580.1 | MNJ7.17, expressed protein, GO:0005554 [molecular_function unknown]                                                                                                                                       | Inserted fragment outside gene models |
| 255000 | 256000 | E=9.2e-21 | At4g17280.1 | FCAALL.393, auxin-responsive family protein, GO:0016020 [membrane] GO:0007275 [development] GO:0005554 [molecular_function unknown]                                                                       | Inserted fragment within model        |
| 255500 | 256500 | E=3.2e-17 | At4g17280.1 | FCAALL.393, auxin-responsive family protein, GO:0016020 [membrane] GO:0007275 [development] GO:0005554 [molecular_function unknown]                                                                       | Inserted fragment within model        |
| 262500 | 263500 | E=6.8e-09 | At2g11910.2 | F23M2.7, expressed protein, GO:0005554 [molecular_function unknown]                                                                                                                                       | Predicted transposon                  |
| 263000 | 264000 | E=5.5e-09 | At2g18540.1 | F24H14.11, cupin family protein, GO:0000004 [biological_process unknown] GO:0008372 [cellular_component unknown] GO:0005554 [molecular_function unknown]                                                  | Predicted transposon                  |
| 291500 | 292500 | E=2.7e-17 | At3g30240.1 | MIL15.14, hypothetical protein, GO:0005554 [molecular_function unknown]                                                                                                                                   | Inserted fragment within model        |
| 292000 | 293000 | E=2.7e-17 | At3g30240.1 | MIL15.14, hypothetical protein, GO:0005554 [molecular_function unknown]                                                                                                                                   | Inserted fragment within model        |

|        |        |           |             |                                                                                                                                                                |                                |
|--------|--------|-----------|-------------|----------------------------------------------------------------------------------------------------------------------------------------------------------------|--------------------------------|
| 296500 | 297500 | E=5.1e-16 | At2g46470.1 | F11C10.16, OXA1 protein, putative, GO:0005554 [molecular_function unknown] GO:0005739 [mitochondrion] GO:0045039 [mitochondrial inner membrane protein import] | Inserted fragment within model |
| 297000 | 298000 | E=5.1e-16 | At2g46470.1 | F11C10.16, OXA1 protein, putative, GO:0005554 [molecular_function unknown] GO:0005739 [mitochondrion] GO:0045039 [mitochondrial inner membrane protein import] | Inserted fragment within model |
| 297500 | 298500 | E=1.1e-13 | At2g46470.1 | F11C10.16, OXA1 protein, putative, GO:0005554 [molecular_function unknown] GO:0005739 [mitochondrion] GO:0045039 [mitochondrial inner membrane protein import] | Inserted fragment within model |
| 318500 | 319500 | E=1.4e-19 | At4g17650.1 | FCAALL.381, aromatic-rich family protein, GO:0005554 [molecular_function unknown]                                                                              | Conserved collinear gene       |
| 319000 | 320000 | E=1.4e-19 | At4g17650.1 | FCAALL.381, aromatic-rich family protein, GO:0005554 [molecular_function unknown]                                                                              | Conserved collinear gene       |
| 319500 | 320500 | E=9.8e-30 | At4g17650.1 | FCAALL.381, aromatic-rich family protein, GO:0005554 [molecular_function unknown]                                                                              | Conserved collinear gene       |
| 320000 | 321000 | E=4.9e-51 | At4g17650.1 | FCAALL.381, aromatic-rich family protein, GO:0005554 [molecular_function unknown]                                                                              | Conserved collinear gene       |
| 320500 | 321500 | E=2.4e-18 | At4g17650.1 | FCAALL.381, aromatic-rich family protein, GO:0005554 [molecular_function unknown]                                                                              | Conserved collinear gene       |
| 322000 | 323000 | E=3.2e-06 | At5g47225.1 | MQL5.8, hypothetical protein, GO:0005554 [molecular_function unknown]                                                                                          | Inserted fragment within model |
| 322500 | 323500 | E=1.4e-23 | At5g47225.1 | MQL5.8, hypothetical protein, GO:0005554 [molecular_function unknown]                                                                                          | Inserted fragment within model |
| 323000 | 324000 | E=8.5e-13 | At5g47225.1 | MQL5.8, hypothetical protein, GO:0005554 [molecular_function unknown]                                                                                          | Inserted fragment within model |
| 326000 | 327000 | E=7.2e-51 | At4g17660.1 | FCAALL.77, protein kinase, putative, GO:0016301 [kinase activity]                                                                                              | Conserved collinear gene       |
| 326500 | 327500 | E=1.4e-95 | At4g17660.1 | FCAALL.77, protein kinase, putative, GO:0016301 [kinase activity]                                                                                              | Conserved collinear gene       |
| 327000 | 328000 | E=1.4e-88 | At4g17660.1 | FCAALL.77, protein kinase, putative, GO:0016301 [kinase activity]                                                                                              | Conserved collinear gene       |
| 327500 | 328500 | E=3.0e-66 | At4g17660.1 | FCAALL.77, protein kinase, putative, GO:0016301 [kinase activity]                                                                                              | Conserved collinear gene       |
| 328500 | 329500 | E=2.1e-19 | At4g05145.1 | C17L7.18, hypothetical protein, GO:0005554 [molecular_function unknown]                                                                                        | Inserted fragment within model |
| 329000 | 330000 | E=1.1e-18 | At1g43570.1 | T10P12.5, hypothetical protein, GO:0005554 [molecular_function unknown]                                                                                        | Inserted fragment              |

|        |        |           |             |                                                                                                                                                                                                                                                      |                                           |
|--------|--------|-----------|-------------|------------------------------------------------------------------------------------------------------------------------------------------------------------------------------------------------------------------------------------------------------|-------------------------------------------|
| 343000 | 344000 | E=3.4e-15 | At4g17695.1 | FCAALL.94, myb family transcription factor (KAN3), GO:0003677 [DNA binding] GO:0003700 [transcription factor activity]                                                                                                                               | within model<br>annotation error          |
| 343500 | 344500 | E=3.2e-26 | At4g17695.1 | FCAALL.94, myb family transcription factor (KAN3), GO:0003677 [DNA binding] GO:0003700 [transcription factor activity]                                                                                                                               | annotation error                          |
| 344000 | 345000 | E=2.5e-12 | At4g17695.1 | FCAALL.94, myb family transcription factor (KAN3), GO:0003677 [DNA binding] GO:0003700 [transcription factor activity]                                                                                                                               | annotation error                          |
| 344500 | 345500 | E=2.0e-08 | At4g17695.1 | FCAALL.94, myb family transcription factor (KAN3), GO:0003677 [DNA binding] GO:0003700 [transcription factor activity]                                                                                                                               | Conserved collinear gene                  |
| 345000 | 346000 | E=2.8e-63 | At4g17695.1 | FCAALL.94, myb family transcription factor (KAN3), GO:0003677 [DNA binding] GO:0003700 [transcription factor activity]                                                                                                                               | Conserved collinear gene                  |
| 345500 | 346500 | E=3.7e-53 | At4g17695.1 | FCAALL.94, myb family transcription factor (KAN3), GO:0003677 [DNA binding] GO:0003700 [transcription factor activity]                                                                                                                               | Conserved collinear gene                  |
| 346000 | 347000 | E=1.8e-06 | At4g17695.1 | FCAALL.94, myb family transcription factor (KAN3), GO:0003677 [DNA binding] GO:0003700 [transcription factor activity]                                                                                                                               | Conserved collinear gene                  |
| 356500 | 357500 | E=1.4e-14 | At2g05950.1 | T6P5.15, hypothetical protein, GO:0005554 [molecular_function unknown]                                                                                                                                                                               | Predicted transposon<br>Inserted fragment |
| 359000 | 360000 | E=2.4e-09 | At5g47225.1 | MQL5.8, hypothetical protein, GO:0005554 [molecular_function unknown]                                                                                                                                                                                | within model<br>Inserted fragment         |
| 359500 | 360500 | E=1.2e-09 | At5g47225.1 | MQL5.8, hypothetical protein, GO:0005554 [molecular_function unknown]                                                                                                                                                                                | within model<br>Inserted fragment         |
| 361500 | 362500 | E=2.1e-07 | At2g06908.1 | T4E14.22, hypothetical protein, GO:0005554 [molecular_function unknown]                                                                                                                                                                              | outside gene models<br>Inserted fragment  |
| 362000 | 363000 | E=2.1e-07 | At2g06908.1 | T4E14.22, hypothetical protein, GO:0005554 [molecular_function unknown]                                                                                                                                                                              | outside gene models                       |
| 371500 | 372500 | E=7.7e-43 | At4g17710.1 | FCAALL.102, homeobox-leucine zipper family protein / lipid-binding START domain-containing protein, GO:0005634 [nucleus] GO:0003677 [DNA binding] GO:0006355 [regulation of transcription, DNA-dependent] GO:0003700 [transcription factor activity] | Conserved collinear gene                  |
| 372000 | 373000 | E=5.2e-72 | At4g17710.1 | FCAALL.102, homeobox-leucine zipper family protein / lipid-binding START domain-containing protein, GO:0005634 [nucleus] GO:0003677 [DNA binding] GO:0006355 [regulation of transcription, DNA-dependent] GO:0003700 [transcription factor activity] | Conserved collinear gene                  |
| 372500 | 373500 | E=3.1e-23 | At4g17710.1 | FCAALL.102, homeobox-leucine zipper family protein / lipid-binding START domain-containing protein, GO:0005634 [nucleus] GO:0003677                                                                                                                  | Conserved collinear gene                  |

|        |        |           |             |                                                                                                                  |                      |
|--------|--------|-----------|-------------|------------------------------------------------------------------------------------------------------------------|----------------------|
|        |        |           |             | [DNA binding] GO:0006355 [regulation of transcription, DNA-dependent] GO:0003700 [transcription factor activity] |                      |
| 376500 | 377500 | E=2.1e-11 | At4g23160.1 | F21P8.50, protein kinase family protein, GO:0016301 [kinase activity]                                            | Predicted transposon |
| 377000 | 378000 | E=6.4e-07 | At4g23160.1 | F21P8.50, protein kinase family protein, GO:0016301 [kinase activity]                                            | Predicted transposon |

CONTIG F

| Start | Stop  | Score      | BLASTn hit  | Description                                                                                                         | Classification           |
|-------|-------|------------|-------------|---------------------------------------------------------------------------------------------------------------------|--------------------------|
|       |       | E=4.4e-06  | At5g63740.1 | MBK5.22, zinc finger protein-related, GO:0005554 [molecular_function unknown]                                       | Predicted transposon     |
| 2500  | 3500  | E=3.1e-14  | At5g63740.1 | MBK5.22, zinc finger protein-related, GO:0005554 [molecular_function unknown]                                       | Predicted transposon     |
| 3000  | 4000  | E=1.9e-45  | At4g17180.1 | FCAALL.368, glycosyl hydrolase family 17 protein, GO:0004553 [hydrolase activity, hydrolyzing O-glycosyl compounds] | Conserved collinear gene |
| 5000  | 6000  | E=1.3e-85  | At4g17180.1 | FCAALL.368, glycosyl hydrolase family 17 protein, GO:0004553 [hydrolase activity, hydrolyzing O-glycosyl compounds] | Conserved collinear gene |
| 5500  | 6500  | E=1.0e-168 | At4g17180.1 | FCAALL.368, glycosyl hydrolase family 17 protein, GO:0004553 [hydrolase activity, hydrolyzing O-glycosyl compounds] | Conserved collinear gene |
| 6000  | 7000  | E=6.6e-95  | At4g17180.1 | FCAALL.368, glycosyl hydrolase family 17 protein, GO:0004553 [hydrolase activity, hydrolyzing O-glycosyl compounds] | Conserved collinear gene |
| 6500  | 7500  | E=9.7e-107 | At4g17180.1 | FCAALL.368, glycosyl hydrolase family 17 protein, GO:0004553 [hydrolase activity, hydrolyzing O-glycosyl compounds] | Conserved collinear gene |
| 7000  | 8000  | E=1.5e-149 | At4g17210.1 | FCAALL.382, myosin heavy chain-related, GO:0005554 [molecular_function unknown]                                     | Conserved collinear gene |
| 7500  | 8500  | E=1.1e-126 | At4g17210.1 | FCAALL.382, myosin heavy chain-related, GO:0005554 [molecular_function unknown]                                     | Conserved collinear gene |
| 8000  | 9000  | E=5.5e-31  | At4g17210.1 | FCAALL.382, myosin heavy chain-related, GO:0005554 [molecular_function unknown]                                     | Conserved collinear gene |
| 8500  | 9500  |            |             |                                                                                                                     | Inserted fragment        |
| 9000  | 10000 | E=1.2e-58  | At4g06599.1 | T11G11.4, ubiquitin family protein, GO:0005554 [molecular_function unknown]                                         | outside gene models      |
|       |       |            |             |                                                                                                                     | Inserted fragment        |
| 9500  | 10500 | E=3.1e-27  | At4g06599.1 | T11G11.4, ubiquitin family protein, GO:0005554 [molecular_function unknown]                                         | outside gene models      |
|       |       |            |             |                                                                                                                     | Inserted fragment        |
| 10000 | 11000 | E=1.7e-50  | At4g06599.1 | T11G11.4, ubiquitin family protein, GO:0005554 [molecular_function unknown]                                         | outside gene             |

|       |       |            |             |                                                                                                                                                                   |                                                                           |
|-------|-------|------------|-------------|-------------------------------------------------------------------------------------------------------------------------------------------------------------------|---------------------------------------------------------------------------|
| 10500 | 11500 | E=2.0e-42  | At4g06599.1 | T11G11.4, ubiquitin family protein, GO:0005554 [molecular_function unknown]                                                                                       | models<br>Inserted<br>fragment<br>outside gene<br>models                  |
| 26000 | 27000 | E=2.8e-11  | At2g05950.1 | T6P5.15, hypothetical protein, GO:0005554 [molecular_function unknown]                                                                                            | Predicted<br>transposon<br>Inserted<br>fragment<br>outside gene<br>models |
| 30500 | 31500 | E=2.3e-06  | At2g07360.1 | T13E11.13, SH3 domain-containing protein, GO:0000004 [biological_process unknown] GO:0008372 [cellular_component unknown] GO:0005554 [molecular_function unknown] | Inserted<br>fragment<br>within model<br>models                            |
| 31000 | 32000 | E=2.2e-26  | At3g22750.1 | MWI23.12, protein kinase, putative, GO:0016301 [kinase activity]                                                                                                  | Inserted<br>fragment<br>within model                                      |
| 31500 | 32500 | E=2.0e-26  | At3g22750.1 | MWI23.12, protein kinase, putative, GO:0016301 [kinase activity]                                                                                                  | Inserted<br>fragment<br>within model                                      |
| 34000 | 35000 | E=1.9e-20  | At5g47635.1 | MNJ7.29, expressed protein, GO:0005554 [molecular_function unknown]                                                                                               | Conserved<br>collinear gene                                               |
| 34500 | 35500 | E=4.8e-40  | At5g47635.1 | MNJ7.29, expressed protein, GO:0005554 [molecular_function unknown]                                                                                               | Conserved<br>collinear gene                                               |
| 35000 | 36000 | E=4.6e-25  | At4g17220.1 | FCAALL.385, expressed protein, GO:0005554 [molecular_function unknown]                                                                                            | Conserved<br>collinear gene                                               |
| 35500 | 36500 | E=4.8e-70  | At4g17220.1 | FCAALL.385, expressed protein, GO:0005554 [molecular_function unknown]                                                                                            | Conserved<br>collinear gene                                               |
| 36000 | 37000 | E=1.9e-117 | At4g17220.1 | FCAALL.385, expressed protein, GO:0005554 [molecular_function unknown]                                                                                            | Conserved<br>collinear gene                                               |
| 36500 | 37500 | E=2.8e-85  | At4g17220.1 | FCAALL.385, expressed protein, GO:0005554 [molecular_function unknown]                                                                                            | Conserved<br>collinear gene                                               |
| 37000 | 38000 | E=1.9e-29  | At4g17220.1 | FCAALL.385, expressed protein, GO:0005554 [molecular_function unknown]                                                                                            | Conserved<br>collinear gene                                               |
| 37500 | 38500 | E=4.7e-18  | At4g17220.1 | FCAALL.385, expressed protein, GO:0005554 [molecular_function unknown]                                                                                            | Conserved<br>collinear gene                                               |
| 39000 | 40000 | E=2.8e-22  | At4g17230.1 | FCAALL.225, scarecrow-like transcription factor 13 (SCL13), GO:0003700 [transcription factor activity]                                                            | Conserved<br>collinear gene                                               |
| 39500 | 40500 | E=4.4e-104 | At4g17230.1 | FCAALL.225, scarecrow-like transcription factor 13 (SCL13), GO:0003700 [transcription factor activity]                                                            | Conserved<br>collinear gene                                               |
| 40000 | 41000 | E=2.4e-111 | At4g17230.1 | FCAALL.225, scarecrow-like transcription factor 13 (SCL13), GO:0003700 [transcription factor activity]                                                            | Conserved<br>collinear gene                                               |
| 40500 | 41500 | E=9.8e-30  | At4g17230.1 | FCAALL.225, scarecrow-like transcription factor 13 (SCL13), GO:0003700 [transcription factor activity]                                                            | Conserved<br>collinear gene                                               |



|       |       |           |             |                                                                                                                                                          |                                       |
|-------|-------|-----------|-------------|----------------------------------------------------------------------------------------------------------------------------------------------------------|---------------------------------------|
| 50500 | 51500 | E=2.3e-17 | At4g17240.1 | FCAALL.387, expressed protein, GO:0005554 [molecular_function unknown]                                                                                   | Conserved collinear gene              |
| 51000 | 52000 | E=5.9e-43 | At4g17240.1 | FCAALL.387, expressed protein, GO:0005554 [molecular_function unknown]                                                                                   | Conserved collinear gene              |
| 51500 | 52500 | E=4.4e-22 | At4g17240.1 | FCAALL.387, expressed protein, GO:0005554 [molecular_function unknown]                                                                                   | Conserved collinear gene              |
| 52000 | 53000 | E=2.9e-23 | At4g17240.1 | FCAALL.387, expressed protein, GO:0005554 [molecular_function unknown]                                                                                   | Conserved collinear gene              |
| 52500 | 53500 | E=5.2e-21 | At4g17240.1 | FCAALL.387, expressed protein, GO:0005554 [molecular_function unknown]                                                                                   | Conserved collinear gene              |
| 55000 | 56000 | E=1.1e-27 | At2g16140.1 | F7H1.16, expressed protein, GO:0005554 [molecular_function unknown]                                                                                      | Inserted fragment within model        |
| 55500 | 56500 | E=2.8e-25 | At2g16140.1 | F7H1.16, expressed protein, GO:0005554 [molecular_function unknown]                                                                                      | Inserted fragment within model        |
| 56500 | 57500 | E=7.8e-33 | At3g15310.1 | K7L4.11, expressed protein, GO:0000004 [biological_process unknown] GO:0008372 [cellular_component unknown] GO:0005554 [molecular_function unknown]      | Inserted fragment within model        |
| 57000 | 58000 | E=7.7e-53 | At3g15310.1 | K7L4.11, expressed protein, GO:0000004 [biological_process unknown] GO:0008372 [cellular_component unknown] GO:0005554 [molecular_function unknown]      | Inserted fragment within model        |
| 57500 | 58500 | E=7.8e-55 | At3g15310.1 | K7L4.11, expressed protein, GO:0000004 [biological_process unknown] GO:0008372 [cellular_component unknown] GO:0005554 [molecular_function unknown]      | Inserted fragment within model        |
| 58000 | 59000 | E=2.0e-48 | At3g15310.1 | K7L4.11, expressed protein, GO:0000004 [biological_process unknown] GO:0008372 [cellular_component unknown] GO:0005554 [molecular_function unknown]      | Inserted fragment within model        |
| 58500 | 59500 | E=7.5e-08 | At1g43590.1 | T10P12.13, hypothetical protein, GO:0005554 [molecular_function unknown] GO:0000004 [biological_process unknown] GO:0008372 [cellular_component unknown] | Inserted fragment outside gene models |
| 62000 | 63000 | E=3.2e-12 | At2g05950.1 | T6P5.15, hypothetical protein, GO:0005554 [molecular_function unknown]                                                                                   | Predicted transposon                  |
| 62500 | 63500 | E=4.3e-12 | At2g05950.1 | T6P5.15, hypothetical protein, GO:0005554 [molecular_function unknown]                                                                                   | Predicted transposon                  |
| 76000 | 77000 | E=5.0e-07 | At1g42190.1 | F19C17.40, hypothetical protein, GO:0005554 [molecular_function unknown]                                                                                 | Predicted transposon                  |
| 76500 | 77500 | E=5.0e-07 | At1g42190.1 | F19C17.40, hypothetical protein, GO:0005554 [molecular_function unknown]                                                                                 | Predicted transposon                  |
| 80500 | 81500 | E=6.0e-   | At4g17245.1 | FCAALL.189, zinc finger (C3HC4-type RING finger) family protein,                                                                                         | Predicted                             |

|        |        |                 |                           |                                                                                                                                                                                              |                                                                              |
|--------|--------|-----------------|---------------------------|----------------------------------------------------------------------------------------------------------------------------------------------------------------------------------------------|------------------------------------------------------------------------------|
| 81000  | 82000  | 31<br>E=7.7e-41 | At4g17245.1               | GO:0005515 [protein binding] GO:0008270 [zinc ion binding]<br>FCAALL.189, zinc finger (C3HC4-type RING finger) family protein,<br>GO:0005515 [protein binding] GO:0008270 [zinc ion binding] | transposon<br>Predicted<br>transposon<br>Largely intact<br>relocated<br>gene |
| 81500  | 82500  | E=5.4e-43       | At2g31290.1               | F16D14.13, expressed protein, GO:0005554 [molecular_function<br>unknown]                                                                                                                     | Largely intact<br>relocated<br>gene                                          |
| 82000  | 83000  | E=7.1e-126      | At2g31290.1               | F16D14.13, expressed protein, GO:0005554 [molecular_function<br>unknown]                                                                                                                     | Largely intact<br>relocated<br>gene                                          |
| 82500  | 83500  | E=7.9e-148      | At2g31290.1               | F16D14.13, expressed protein, GO:0005554 [molecular_function<br>unknown]                                                                                                                     | Largely intact<br>relocated<br>gene                                          |
| 83000  | 84000  | E=2.6e-65       | At2g31290.1               | F16D14.13, expressed protein, GO:0005554 [molecular_function<br>unknown]                                                                                                                     | Largely intact<br>relocated<br>gene                                          |
| 83500  | 84500  | E=3.0e-36       | At5g47580.1<br>(+4g17250) | MNJ7.17, expressed protein, GO:0005554 [molecular_function<br>unknown]                                                                                                                       | Predicted<br>transposon                                                      |
| 84000  | 85000  | E=1.2e-22       | At5g47580.1<br>(+4g17250) | MNJ7.17, expressed protein, GO:0005554 [molecular_function<br>unknown]                                                                                                                       | Predicted<br>transposon                                                      |
| 90000  | 91000  | E=4.7e-37       | At4g17260.1               | FCAALL.172, L-lactate dehydrogenase, putative, GO:0004457 [lactate<br>dehydrogenase activity]                                                                                                | Conserved<br>collinear gene                                                  |
| 90500  | 91500  | E=1.6e-92       | At4g17260.1               | FCAALL.172, L-lactate dehydrogenase, putative, GO:0004457 [lactate<br>dehydrogenase activity]                                                                                                | Conserved<br>collinear gene                                                  |
| 91000  | 92000  | E=1.3e-62       | At4g17260.1               | FCAALL.172, L-lactate dehydrogenase, putative, GO:0004457 [lactate<br>dehydrogenase activity]                                                                                                | Conserved<br>collinear gene                                                  |
| 91500  | 92500  | E=3.8e-73       | At4g17260.1               | FCAALL.172, L-lactate dehydrogenase, putative, GO:0004457 [lactate<br>dehydrogenase activity]                                                                                                | Conserved<br>collinear gene                                                  |
| 92000  | 93000  | E=5.3e-60       | At4g17260.1               | FCAALL.172, L-lactate dehydrogenase, putative, GO:0004457 [lactate<br>dehydrogenase activity]                                                                                                | Conserved<br>collinear gene                                                  |
| 92500  | 93500  | E=3.7e-07       | At4g17270.1               | FCAALL.22, Mo25 family protein, GO:0005554 [molecular_function<br>unknown]                                                                                                                   | Additional<br>collinear gene<br>fragment                                     |
| 93000  | 94000  | E=8.9e-13       | At4g17270.1               | FCAALL.22, Mo25 family protein, GO:0005554 [molecular_function<br>unknown]                                                                                                                   | Additional<br>collinear gene<br>fragment                                     |
| 93500  | 94500  | E=9.1e-07       | At4g17270.1               | FCAALL.22, Mo25 family protein, GO:0005554 [molecular_function<br>unknown]                                                                                                                   | Additional<br>collinear gene<br>fragment                                     |
| 100000 | 101000 | E=1.4e-07       | At4g17270.1               | FCAALL.22, Mo25 family protein, GO:0005554 [molecular_function<br>unknown]                                                                                                                   | Additional<br>collinear gene<br>fragment                                     |

|        |        |            |             |                                                                                                                                                                                                                                                                                              |                                    |
|--------|--------|------------|-------------|----------------------------------------------------------------------------------------------------------------------------------------------------------------------------------------------------------------------------------------------------------------------------------------------|------------------------------------|
| 100500 | 101500 | E=1.5e-17  | At5g47540.1 | MNJ7.13, Mo25 family protein, GO:0005554 [molecular_function unknown]                                                                                                                                                                                                                        | Additional collinear gene fragment |
| 101000 | 102000 | E=2.4e-35  | At5g47530.1 | MNJ7.12, auxin-responsive protein, putative, GO:0016020 [membrane]                                                                                                                                                                                                                           | Conserved collinear gene           |
| 101500 | 102500 | E=7.4e-107 | At5g47530.1 | GO:0007275 [development] GO:0005554 [molecular_function unknown]                                                                                                                                                                                                                             | Conserved collinear gene           |
| 102000 | 103000 | E=1.4e-143 | At4g17280.1 | MNJ7.12, auxin-responsive protein, putative, GO:0016020 [membrane]                                                                                                                                                                                                                           | Conserved collinear gene           |
| 102500 | 103500 | E=1.6e-66  | At4g17280.1 | FCAALL.393, auxin-responsive family protein, GO:0016020 [membrane] GO:0007275 [development] GO:0005554 [molecular_function unknown]                                                                                                                                                          | Conserved collinear gene           |
| 103500 | 104500 | E=4.1e-18  | At4g17300.1 | FCAALL.396, asparaginyl-tRNA synthetase, chloroplast, mitochondrial / asparagine-tRNA ligase / AsnRS (SYNO), GO:0006421 [asparaginyl-tRNA aminoacylation] GO:0006412 [protein biosynthesis] GO:0004816 [asparagine-tRNA ligase activity] GO:0005739 [mitochondrion] GO:0009507 [chloroplast] | Conserved collinear gene           |
| 104000 | 105000 | E=5.1e-77  | At4g17300.1 | FCAALL.396, asparaginyl-tRNA synthetase, chloroplast, mitochondrial / asparagine-tRNA ligase / AsnRS (SYNO), GO:0006421 [asparaginyl-tRNA aminoacylation] GO:0006412 [protein biosynthesis] GO:0004816 [asparagine-tRNA ligase activity] GO:0005739 [mitochondrion] GO:0009507 [chloroplast] | Conserved collinear gene           |
| 104500 | 105500 | E=1.7e-65  | At4g17300.1 | FCAALL.396, asparaginyl-tRNA synthetase, chloroplast, mitochondrial / asparagine-tRNA ligase / AsnRS (SYNO), GO:0006421 [asparaginyl-tRNA aminoacylation] GO:0006412 [protein biosynthesis] GO:0004816 [asparagine-tRNA ligase activity] GO:0005739 [mitochondrion] GO:0009507 [chloroplast] | Conserved collinear gene           |
| 105000 | 106000 | E=9.3e-51  | At4g17300.1 | FCAALL.396, asparaginyl-tRNA synthetase, chloroplast, mitochondrial / asparagine-tRNA ligase / AsnRS (SYNO), GO:0006421 [asparaginyl-tRNA aminoacylation] GO:0006412 [protein biosynthesis] GO:0004816 [asparagine-tRNA ligase activity] GO:0005739 [mitochondrion] GO:0009507 [chloroplast] | Conserved collinear gene           |
| 105500 | 106500 | E=2.3e-48  | At4g17300.1 | FCAALL.396, asparaginyl-tRNA synthetase, chloroplast, mitochondrial / asparagine-tRNA ligase / AsnRS (SYNO), GO:0006421 [asparaginyl-tRNA aminoacylation] GO:0006412 [protein biosynthesis] GO:0004816 [asparagine-tRNA ligase activity] GO:0005739 [mitochondrion] GO:0009507 [chloroplast] | Conserved collinear gene           |
| 106000 | 107000 | E=4.1e-67  | At4g17300.1 | FCAALL.396, asparaginyl-tRNA synthetase, chloroplast, mitochondrial / asparagine-tRNA ligase / AsnRS (SYNO), GO:0006421 [asparaginyl-tRNA aminoacylation] GO:0006412 [protein biosynthesis] GO:0004816 [asparagine-tRNA ligase activity] GO:0005739 [mitochondrion] GO:0009507 [chloroplast] | Conserved collinear gene           |

|        |        |           |             |                                                                                                                                                                                                                                                                                                                                                                                                                                                                                                                                                                                                                                                                                                |                                |
|--------|--------|-----------|-------------|------------------------------------------------------------------------------------------------------------------------------------------------------------------------------------------------------------------------------------------------------------------------------------------------------------------------------------------------------------------------------------------------------------------------------------------------------------------------------------------------------------------------------------------------------------------------------------------------------------------------------------------------------------------------------------------------|--------------------------------|
| 106500 | 107500 | E=5.0e-33 | At4g17300.1 | [asparagine-tRNA ligase activity] GO:0005739 [mitochondrion]<br>GO:0009507 [chloroplast]<br>FCAALL.396, asparaginyl-tRNA synthetase, chloroplast, mitochondrial / asparagine-tRNA ligase / AsnRS (SYNO), GO:0006421 [asparaginyl-tRNA aminoacylation] GO:0006412 [protein biosynthesis] GO:0004816 [asparagine-tRNA ligase activity] GO:0005739 [mitochondrion]<br>GO:0009507 [chloroplast]<br>FCAALL.396, asparaginyl-tRNA synthetase, chloroplast, mitochondrial / asparagine-tRNA ligase / AsnRS (SYNO), GO:0006421 [asparaginyl-tRNA aminoacylation] GO:0006412 [protein biosynthesis] GO:0004816 [asparagine-tRNA ligase activity] GO:0005739 [mitochondrion]<br>GO:0009507 [chloroplast] | Conserved collinear gene       |
| 107000 | 108000 | E=1.2e-14 | At4g17300.1 | [asparagine-tRNA ligase activity] GO:0005739 [mitochondrion]<br>GO:0009507 [chloroplast]<br>FCAALL.396, asparaginyl-tRNA synthetase, chloroplast, mitochondrial / asparagine-tRNA ligase / AsnRS (SYNO), GO:0006421 [asparaginyl-tRNA aminoacylation] GO:0006412 [protein biosynthesis] GO:0004816 [asparagine-tRNA ligase activity] GO:0005739 [mitochondrion]<br>GO:0009507 [chloroplast]                                                                                                                                                                                                                                                                                                    | Conserved collinear gene       |
| 107500 | 108500 | E=4.2e-65 | At4g17300.1 | [asparagine-tRNA ligase activity] GO:0005739 [mitochondrion]<br>GO:0009507 [chloroplast]<br>FCAALL.396, asparaginyl-tRNA synthetase, chloroplast, mitochondrial / asparagine-tRNA ligase / AsnRS (SYNO), GO:0006421 [asparaginyl-tRNA aminoacylation] GO:0006412 [protein biosynthesis] GO:0004816 [asparagine-tRNA ligase activity] GO:0005739 [mitochondrion]<br>GO:0009507 [chloroplast]                                                                                                                                                                                                                                                                                                    | Conserved collinear gene       |
| 108000 | 109000 | E=2.0e-39 | At4g17300.1 | [asparagine-tRNA ligase activity] GO:0005739 [mitochondrion]<br>GO:0009507 [chloroplast]                                                                                                                                                                                                                                                                                                                                                                                                                                                                                                                                                                                                       | Conserved collinear gene       |
| 118000 | 119000 | E=7.4e-34 | At3g53240.1 | T4D2.170, leucine-rich repeat family protein, GO:0007165 [signal transduction] GO:0005515 [protein binding]                                                                                                                                                                                                                                                                                                                                                                                                                                                                                                                                                                                    | Inserted fragment within model |
| 118500 | 119500 | E=1.7e-60 | At3g53240.1 | T4D2.170, leucine-rich repeat family protein, GO:0007165 [signal transduction] GO:0005515 [protein binding]                                                                                                                                                                                                                                                                                                                                                                                                                                                                                                                                                                                    | Inserted fragment within model |
| 119000 | 120000 | E=1.9e-38 | At1g74180.1 | F9E11.6, leucine-rich repeat family protein, GO:0007165 [signal transduction] GO:0005515 [protein binding]                                                                                                                                                                                                                                                                                                                                                                                                                                                                                                                                                                                     | Inserted fragment within model |
| 127500 | 128500 | E=4.2e-27 | At3g13250.1 | MDC11.18, hypothetical protein, GO:0005554 [molecular_function unknown]                                                                                                                                                                                                                                                                                                                                                                                                                                                                                                                                                                                                                        | Inserted fragment within model |
| 128000 | 129000 | E=9.8e-56 | At3g51700.1 | T18N14.80, expressed protein, GO:0005554 [molecular_function unknown]                                                                                                                                                                                                                                                                                                                                                                                                                                                                                                                                                                                                                          | Inserted fragment within model |
| 128500 | 129500 | E=1.3e-61 | At3g13250.1 | MDC11.18, hypothetical protein, GO:0005554 [molecular_function unknown]                                                                                                                                                                                                                                                                                                                                                                                                                                                                                                                                                                                                                        | Inserted fragment within model |
| 129000 | 130000 | E=8.9e-   | At1g52960.1 | F14G24.23, hypothetical protein, GO:0005554 [molecular_function unknown]                                                                                                                                                                                                                                                                                                                                                                                                                                                                                                                                                                                                                       | Inserted                       |

|        |        |           |             |                                                                                                                                                                             |  |                                          |
|--------|--------|-----------|-------------|-----------------------------------------------------------------------------------------------------------------------------------------------------------------------------|--|------------------------------------------|
|        |        | 73        |             | unknown]                                                                                                                                                                    |  | fragment<br>within model                 |
| 129500 | 130500 | E=3.8e-35 | At3g13250.1 | MDC11.18, hypothetical protein, GO:0005554 [molecular_function unknown]                                                                                                     |  | Inserted<br>fragment<br>within model     |
| 130000 | 131000 | E=1.2e-28 | At3g13250.1 | MDC11.18, hypothetical protein, GO:0005554 [molecular_function unknown]                                                                                                     |  | Inserted<br>fragment<br>within model     |
| 130500 | 131500 | E=2.6e-46 | At1g35940.1 | F10O5.11, AT hook motif-containing protein-related, GO:0000004 [biological_process unknown] GO:0008372 [cellular_component unknown] GO:0005554 [molecular_function unknown] |  | Inserted<br>fragment<br>within model     |
| 131000 | 132000 | E=1.5e-66 | At1g35940.1 | F10O5.11, AT hook motif-containing protein-related, GO:0000004 [biological_process unknown] GO:0008372 [cellular_component unknown] GO:0005554 [molecular_function unknown] |  | Inserted<br>fragment<br>within model     |
| 131500 | 132500 | E=1.9e-50 | At2g05080.1 | F1O13.21, hypothetical protein, GO:0005554 [molecular_function unknown]                                                                                                     |  | Inserted<br>fragment<br>within model     |
| 132000 | 133000 | E=5.3e-51 | At5g37110.1 | MJG14.16, hypothetical protein, GO:0005554 [molecular_function unknown]                                                                                                     |  | Inserted<br>fragment<br>within model     |
| 132500 | 133500 | E=1.8e-28 | At5g37110.1 | MJG14.16, hypothetical protein, GO:0005554 [molecular_function unknown]                                                                                                     |  | Inserted<br>fragment<br>within model     |
| 137000 | 138000 | E=7.8e-10 | At4g17330.1 | FCAALL.411, agenet domain-containing protein, GO:0000004 [biological_process unknown] GO:0008372 [cellular_component unknown] GO:0005554 [molecular_function unknown]       |  | Additional<br>collinear gene<br>fragment |
| 137500 | 138500 | E=1.9e-47 | At4g17330.1 | FCAALL.411, agenet domain-containing protein, GO:0000004 [biological_process unknown] GO:0008372 [cellular_component unknown] GO:0005554 [molecular_function unknown]       |  | Additional<br>collinear gene<br>fragment |
| 138000 | 139000 | E=8.1e-33 | At4g17330.1 | FCAALL.411, agenet domain-containing protein, GO:0000004 [biological_process unknown] GO:0008372 [cellular_component unknown] GO:0005554 [molecular_function unknown]       |  | Additional<br>collinear gene<br>fragment |
| 143500 | 144500 | E=5.0e-35 | At1g50920.1 | F8A12.14, GTP-binding protein-related, GO:0000166 [nucleotide binding]                                                                                                      |  | Inserted<br>fragment<br>within model     |
| 144000 | 145000 | E=5.0e-35 | At1g50920.1 | F8A12.14, GTP-binding protein-related, GO:0000166 [nucleotide binding]                                                                                                      |  | Inserted<br>fragment<br>within model     |
| 145000 | 146000 | E=6.2e-50 | At3g31980.1 | F8N14.16, hypothetical protein, GO:0005554 [molecular_function unknown]                                                                                                     |  | Inserted<br>fragment<br>within model     |

|        |        |           |             |                                                                                                                                                                                                                                                                |                                |
|--------|--------|-----------|-------------|----------------------------------------------------------------------------------------------------------------------------------------------------------------------------------------------------------------------------------------------------------------|--------------------------------|
| 145500 | 146500 | E=7.6e-85 | At3g31980.1 | F8N14.16, hypothetical protein, GO:0005554 [molecular_function unknown]                                                                                                                                                                                        | Inserted fragment within model |
| 146000 | 147000 | E=4.0e-90 | At3g31980.1 | F8N14.16, hypothetical protein, GO:0005554 [molecular_function unknown]                                                                                                                                                                                        | Inserted fragment within model |
| 146500 | 147500 | E=8.2e-74 | At2g05080.1 | F1O13.21, hypothetical protein, GO:0005554 [molecular_function unknown]                                                                                                                                                                                        | Inserted fragment within model |
| 147000 | 148000 | E=1.4e-24 | At2g05080.1 | F1O13.21, hypothetical protein, GO:0005554 [molecular_function unknown]                                                                                                                                                                                        | Inserted fragment within model |
| 147500 | 148500 | E=3.3e-17 | At5g37110.1 | MJG14.16, hypothetical protein, GO:0005554 [molecular_function unknown]                                                                                                                                                                                        | Inserted fragment within model |
| 153000 | 154000 | E=6.7e-38 | At4g17340.1 | FCAALL.412, major intrinsic family protein / MIP family protein, GO:0016020 [membrane] GO:0006810 [transport] GO:0015250 [water channel activity]                                                                                                              | Conserved collinear gene       |
| 153500 | 154500 | E=1.2e-88 | At5g47450.1 | MQL5.31, major intrinsic family protein / MIP family protein, GO:0016020 [membrane] GO:0006810 [transport] GO:0015250 [water channel activity]                                                                                                                 | Conserved collinear gene       |
| 154000 | 155000 | E=6.1e-72 | At5g47450.1 | MQL5.31, major intrinsic family protein / MIP family protein, GO:0016020 [membrane] GO:0006810 [transport] GO:0015250 [water channel activity]                                                                                                                 | Conserved collinear gene       |
| 154500 | 155500 | E=4.0e-23 | At4g17340.1 | FCAALL.412, major intrinsic family protein / MIP family protein, GO:0016020 [membrane] GO:0006810 [transport] GO:0015250 [water channel activity]                                                                                                              | Conserved collinear gene       |
| 155500 | 156500 | E=4.4e-40 | At4g17350.1 | FCAALL.415, expressed protein, GO:0005554 [molecular_function unknown]                                                                                                                                                                                         | Conserved collinear gene       |
| 156000 | 157000 | E=4.1e-87 | At4g17350.1 | FCAALL.415, expressed protein, GO:0005554 [molecular_function unknown]                                                                                                                                                                                         | Conserved collinear gene       |
| 156500 | 157500 | E=4.1e-99 | At4g17350.1 | FCAALL.415, expressed protein, GO:0005554 [molecular_function unknown]                                                                                                                                                                                         | Conserved collinear gene       |
| 157000 | 158000 | E=1.6e-95 | At4g17350.1 | FCAALL.415, expressed protein, GO:0005554 [molecular_function unknown]                                                                                                                                                                                         | Conserved collinear gene       |
| 157500 | 158500 | E=1.9e-46 | At4g17350.1 | FCAALL.415, expressed protein, GO:0005554 [molecular_function unknown]                                                                                                                                                                                         | Conserved collinear gene       |
| 158000 | 159000 | E=4.0e-49 | At5g47435.2 | MNJ7.1, formyltetrahydrofolate deformylase, putative, GO:0009152 [purine ribonucleotide biosynthesis] GO:0008864 [formyltetrahydrofolate deformylase activity] GO:0009058 [biosynthesis] GO:0016742 [hydroxymethyl-, formyl- and related transferase activity] | Conserved collinear gene       |

|        |        |           |             |                                                                                                                                                                                                                                                                    |                                |
|--------|--------|-----------|-------------|--------------------------------------------------------------------------------------------------------------------------------------------------------------------------------------------------------------------------------------------------------------------|--------------------------------|
| 158500 | 159500 | E=4.8e-84 | At4g17360.1 | FCAALL.417, formyltetrahydrofolate deformylase, putative, GO:0009152 [purine ribonucleotide biosynthesis] GO:0008864 [formyltetrahydrofolate deformylase activity] GO:0009058 [biosynthesis] GO:0016742 [hydroxymethyl-, formyl- and related transferase activity] | Conserved collinear gene       |
| 159000 | 160000 | E=3.0e-68 | At4g17360.1 | FCAALL.417, formyltetrahydrofolate deformylase, putative, GO:0009152 [purine ribonucleotide biosynthesis] GO:0008864 [formyltetrahydrofolate deformylase activity] GO:0009058 [biosynthesis] GO:0016742 [hydroxymethyl-, formyl- and related transferase activity] | Conserved collinear gene       |
| 159500 | 160500 | E=6.3e-23 | At4g17360.1 | FCAALL.417, formyltetrahydrofolate deformylase, putative, GO:0009152 [purine ribonucleotide biosynthesis] GO:0008864 [formyltetrahydrofolate deformylase activity] GO:0009058 [biosynthesis] GO:0016742 [hydroxymethyl-, formyl- and related transferase activity] | Conserved collinear gene       |
| 160500 | 161500 | E=2.4e-39 | At4g17390.1 | FCAALL.32, 60S ribosomal protein L15 (RPL15B), GO:0005840 [ribosome] GO:0006412 [protein biosynthesis] GO:0003735 [structural constituent of ribosome]                                                                                                             | Conserved collinear gene       |
| 161000 | 162000 | E=5.4e-75 | At4g17390.1 | FCAALL.32, 60S ribosomal protein L15 (RPL15B), GO:0005840 [ribosome] GO:0006412 [protein biosynthesis] GO:0003735 [structural constituent of ribosome]                                                                                                             | Conserved collinear gene       |
| 161500 | 162500 | E=1.4e-60 | At4g17390.1 | FCAALL.32, 60S ribosomal protein L15 (RPL15B), GO:0005840 [ribosome] GO:0006412 [protein biosynthesis] GO:0003735 [structural constituent of ribosome]                                                                                                             | Conserved collinear gene       |
| 162000 | 163000 | E=8.9e-29 | At4g17390.1 | FCAALL.32, 60S ribosomal protein L15 (RPL15B), GO:0005840 [ribosome] GO:0006412 [protein biosynthesis] GO:0003735 [structural constituent of ribosome]                                                                                                             | Conserved collinear gene       |
| 163000 | 164000 | E=1.4e-23 | At3g15310.1 | K7L4.11, expressed protein, GO:0000004 [biological_process unknown] GO:0008372 [cellular_component unknown] GO:0005554 [molecular_function unknown]                                                                                                                | Inserted fragment within model |
| 163500 | 164500 | E=3.6e-86 | At5g32621.1 | F15I15.2, expressed protein, GO:0005554 [molecular_function unknown] GO:0000004 [biological_process unknown] GO:0008372 [cellular_component unknown]                                                                                                               | Inserted fragment within model |
| 164000 | 165000 | E=2.2e-82 | At5g32621.1 | F15I15.2, expressed protein, GO:0005554 [molecular_function unknown] GO:0000004 [biological_process unknown] GO:0008372 [cellular_component unknown]                                                                                                               | Inserted fragment within model |
| 164500 | 165500 | E=4.1e-16 | At5g32621.1 | F15I15.2, expressed protein, GO:0005554 [molecular_function unknown] GO:0000004 [biological_process unknown] GO:0008372 [cellular_component unknown]                                                                                                               | Inserted fragment within model |
| 165500 | 166500 | E=1.5e-26 | At5g47430.1 | MQL5.29, expressed protein, GO:0005554 [molecular_function unknown]                                                                                                                                                                                                | Conserved collinear gene       |
| 166000 | 167000 | E=1.3e-43 | At5g47430.1 | MQL5.29, expressed protein, GO:0005554 [molecular_function unknown]                                                                                                                                                                                                | Conserved collinear gene       |
| 166500 | 167500 | E=2.5e-   | At5g47430.1 | MQL5.29, expressed protein, GO:0005554 [molecular_function unknown]                                                                                                                                                                                                | Conserved                      |

|        |        |            |             |                                                                                                                                       |  |                                |
|--------|--------|------------|-------------|---------------------------------------------------------------------------------------------------------------------------------------|--|--------------------------------|
|        |        | 43         |             | unknown]                                                                                                                              |  | collinear gene                 |
| 167000 | 168000 | E=3.7e-63  | At4g17410.1 | FCAALL.426, expressed protein, GO:0005554 [molecular_function unknown]                                                                |  | Conserved collinear gene       |
| 167500 | 168500 | E=5.1e-101 | At4g17410.1 | FCAALL.426, expressed protein, GO:0005554 [molecular_function unknown]                                                                |  | Conserved collinear gene       |
| 168000 | 169000 | E=8.4e-84  | At4g17410.1 | FCAALL.426, expressed protein, GO:0005554 [molecular_function unknown]                                                                |  | Conserved collinear gene       |
| 168500 | 169500 | E=1.8e-59  | At4g17410.1 | FCAALL.426, expressed protein, GO:0005554 [molecular_function unknown]                                                                |  | Conserved collinear gene       |
| 169000 | 170000 | E=4.1e-30  | At4g17410.1 | FCAALL.426, expressed protein, GO:0005554 [molecular_function unknown]                                                                |  | Conserved collinear gene       |
| 169500 | 170500 | E=2.0e-44  | At4g17410.1 | FCAALL.426, expressed protein, GO:0005554 [molecular_function unknown]                                                                |  | Conserved collinear gene       |
| 170000 | 171000 | E=4.8e-50  | At4g17410.1 | FCAALL.426, expressed protein, GO:0005554 [molecular_function unknown]                                                                |  | Conserved collinear gene       |
| 181000 | 182000 | E=3.9e-10  | At4g08410.1 | T28D5.100, proline-rich extensin-like family protein, GO:0000004 [biological_process unknown] GO:0005554 [molecular_function unknown] |  | Inserted fragment within model |
| 181500 | 182500 | E=6.5e-47  | At5g35190.1 | T25C13.70, proline-rich extensin-like family protein, GO:0000004 [biological_process unknown] GO:0005554 [molecular_function unknown] |  | Inserted fragment within model |
| 182000 | 183000 | E=9.3e-94  | At2g24980.1 | F27C12.10, proline-rich extensin-like family protein, GO:0000004 [biological_process unknown] GO:0005554 [molecular_function unknown] |  | Inserted fragment within model |
| 182500 | 183500 | E=1.6e-111 | At4g13390.1 | T9E8.130, proline-rich extensin-like family protein, GO:0000004 [biological_process unknown] GO:0005554 [molecular_function unknown]  |  | Inserted fragment within model |
| 183000 | 184000 | E=8.7e-57  | At4g13390.1 | T9E8.130, proline-rich extensin-like family protein, GO:0000004 [biological_process unknown] GO:0005554 [molecular_function unknown]  |  | Inserted fragment within model |
| 186000 | 187000 | E=2.7e-22  | At5g35190.1 | T25C13.70, proline-rich extensin-like family protein, GO:0000004 [biological_process unknown] GO:0005554 [molecular_function unknown] |  | Inserted fragment within model |
| 186500 | 187500 | E=2.3e-72  | At4g13390.1 | T9E8.130, proline-rich extensin-like family protein, GO:0000004 [biological_process unknown] GO:0005554 [molecular_function unknown]  |  | Inserted fragment within model |
| 187000 | 188000 | E=8.6e-120 | At4g13390.1 | T9E8.130, proline-rich extensin-like family protein, GO:0000004 [biological_process unknown] GO:0005554 [molecular_function unknown]  |  | Inserted fragment within model |
| 187500 | 188500 | E=8.0e-58  | At4g13390.1 | T9E8.130, proline-rich extensin-like family protein, GO:0000004 [biological_process unknown] GO:0005554 [molecular_function unknown]  |  | Inserted fragment              |



|        |        |            |             |                                                                                                                                                                |                                       |
|--------|--------|------------|-------------|----------------------------------------------------------------------------------------------------------------------------------------------------------------|---------------------------------------|
|        |        |            |             | unknown]                                                                                                                                                       | within model                          |
| 189500 | 190500 | E=9.4e-13  | At2g31700.1 | T9H9.22, hypothetical protein, GO:0005554 [molecular_function unknown]                                                                                         | Inserted fragment outside gene models |
| 191000 | 192000 | E=1.2e-11  | At5g35190.1 | T25C13.70, proline-rich extensin-like family protein, GO:0000004 [biological_process unknown] GO:0005554 [molecular_function unknown]                          | Inserted fragment within model        |
| 191500 | 192500 | E=2.6e-87  | At4g13390.1 | T9E8.130, proline-rich extensin-like family protein, GO:0000004 [biological_process unknown] GO:0005554 [molecular_function unknown]                           | Inserted fragment within model        |
| 192000 | 193000 | E=4.5e-112 | At4g13390.1 | T9E8.130, proline-rich extensin-like family protein, GO:0000004 [biological_process unknown] GO:0005554 [molecular_function unknown]                           | Inserted fragment within model        |
| 192500 | 193500 | E=3.0e-111 | At4g13390.1 | T9E8.130, proline-rich extensin-like family protein, GO:0000004 [biological_process unknown] GO:0005554 [molecular_function unknown]                           | Inserted fragment within model        |
| 193000 | 194000 | E=9.8e-65  | At4g13390.1 | T9E8.130, proline-rich extensin-like family protein, GO:0000004 [biological_process unknown] GO:0005554 [molecular_function unknown]                           | Inserted fragment within model        |
| 193500 | 194500 | E=1.8e-16  | At1g02230.1 | T7I23.19, no apical meristem (NAM) family protein, GO:0007275 [development] GO:0005554 [molecular_function unknown] GO:0003700 [transcription factor activity] | Inserted fragment within model        |
| 194000 | 195000 | E=5.7e-06  | At3g09510.1 | F11F8.9, hypothetical protein, GO:0005554 [molecular_function unknown]                                                                                         | Inserted fragment within model        |
| 208500 | 209500 | E=1.5e-07  | At1g48720.1 | F11I4.11, hypothetical protein, GO:0005554 [molecular_function unknown]                                                                                        | Predicted transposon                  |
| 209000 | 210000 | E=6.5e-42  | At1g48720.1 | F11I4.11, hypothetical protein, GO:0005554 [molecular_function unknown]                                                                                        | Predicted transposon                  |
| 209500 | 210500 | E=8.7e-29  | At3g42250.1 | F26B15.50, hypothetical protein, GO:0005554 [molecular_function unknown]                                                                                       | Predicted transposon                  |
| 225500 | 226500 | E=1.6e-14  | At2g05950.1 | T6P5.15, hypothetical protein, GO:0005554 [molecular_function unknown]                                                                                         | Predicted transposon                  |
| 226000 | 227000 | E=1.4e-14  | At2g05950.1 | T6P5.15, hypothetical protein, GO:0005554 [molecular_function unknown]                                                                                         | Predicted transposon                  |
| 239000 | 240000 | E=9.1e-15  | At5g63740.1 | MBK5.22, zinc finger protein-related, GO:0005554 [molecular_function unknown]                                                                                  | Predicted transposon                  |
| 239500 | 240500 | E=2.0e-14  | At5g63740.1 | MBK5.22, zinc finger protein-related, GO:0005554 [molecular_function unknown]                                                                                  | Predicted transposon                  |
| 240500 | 241500 | E=2.0e-    | At4g17420.1 | FCAALL.389, expressed protein, GO:0000004 [biological_process                                                                                                  | Conserved                             |

|        |        |            |             |                                                                                                                                                                                               |                                |
|--------|--------|------------|-------------|-----------------------------------------------------------------------------------------------------------------------------------------------------------------------------------------------|--------------------------------|
|        |        | 13         |             | unknown] GO:0008372 [cellular_component unknown] GO:0005554 [molecular_function unknown]                                                                                                      | collinear gene                 |
| 241000 | 242000 | E=1.1e-56  | At4g17420.1 | FCAALL.389, expressed protein, GO:0000004 [biological_process unknown] GO:0008372 [cellular_component unknown] GO:0005554 [molecular_function unknown]                                        | Conserved collinear gene       |
| 241500 | 242500 | E=3.3e-62  | At4g17420.1 | FCAALL.389, expressed protein, GO:0000004 [biological_process unknown] GO:0008372 [cellular_component unknown] GO:0005554 [molecular_function unknown]                                        | Conserved collinear gene       |
| 242000 | 243000 | E=5.1e-60  | At4g17420.1 | FCAALL.389, expressed protein, GO:0000004 [biological_process unknown] GO:0008372 [cellular_component unknown] GO:0005554 [molecular_function unknown]                                        | Conserved collinear gene       |
| 242500 | 243500 | E=2.7e-34  | At4g17420.1 | FCAALL.389, expressed protein, GO:0000004 [biological_process unknown] GO:0008372 [cellular_component unknown] GO:0005554 [molecular_function unknown]                                        | Conserved collinear gene       |
| 243000 | 244000 | E=1.2e-52  | At4g17430.1 | FCAALL.1, expressed protein, GO:0005554 [molecular_function unknown]                                                                                                                          | Conserved collinear gene       |
| 243500 | 244500 | E=2.1e-126 | At4g17430.1 | FCAALL.1, expressed protein, GO:0005554 [molecular_function unknown]                                                                                                                          | Conserved collinear gene       |
| 244000 | 245000 | E=1.5e-147 | At4g17430.1 | FCAALL.1, expressed protein, GO:0005554 [molecular_function unknown]                                                                                                                          | Conserved collinear gene       |
| 244500 | 245500 | E=3.2e-99  | At4g17430.1 | FCAALL.1, expressed protein, GO:0005554 [molecular_function unknown]                                                                                                                          | Conserved collinear gene       |
| 245000 | 246000 | E=1.3e-21  | At4g17430.1 | FCAALL.1, expressed protein, GO:0005554 [molecular_function unknown]                                                                                                                          | Conserved collinear gene       |
| 249000 | 250000 | E=9.1e-16  | At4g13780.1 | F18A5.170, methionine--tRNA ligase, putative / methionyl-tRNA synthetase, putative / MetRS, putative, GO:0004825 [methionine-tRNA ligase activity] GO:0006431 [methionyl-tRNA aminoacylation] | Inserted fragment within model |
| 249500 | 250500 | E=3.5e-25  | At4g13780.1 | F18A5.170, methionine--tRNA ligase, putative / methionyl-tRNA synthetase, putative / MetRS, putative, GO:0004825 [methionine-tRNA ligase activity] GO:0006431 [methionyl-tRNA aminoacylation] | Inserted fragment within model |
| 250000 | 251000 | E=1.4e-19  | At4g13780.1 | F18A5.170, methionine--tRNA ligase, putative / methionyl-tRNA synthetase, putative / MetRS, putative, GO:0004825 [methionine-tRNA ligase activity] GO:0006431 [methionyl-tRNA aminoacylation] | Inserted fragment within model |
| 250500 | 251500 | E=1.1e-28  | At4g13780.1 | F18A5.170, methionine--tRNA ligase, putative / methionyl-tRNA synthetase, putative / MetRS, putative, GO:0004825 [methionine-tRNA ligase activity] GO:0006431 [methionyl-tRNA aminoacylation] | Inserted fragment within model |
| 251000 | 252000 | E=1.4e-09  | At4g13780.1 | F18A5.170, methionine--tRNA ligase, putative / methionyl-tRNA synthetase, putative / MetRS, putative, GO:0004825 [methionine-tRNA ligase activity] GO:0006431 [methionyl-tRNA aminoacylation] | Inserted fragment within model |
| 254500 | 255500 | E=2.7e-07  | At4g23160.1 | F21P8.50, protein kinase family protein, GO:0016301 [kinase activity]                                                                                                                         | Predicted transposon           |

|        |        |           |             |                                                                                                                                                                                                                           |                                           |
|--------|--------|-----------|-------------|---------------------------------------------------------------------------------------------------------------------------------------------------------------------------------------------------------------------------|-------------------------------------------|
| 255000 | 256000 | E=1.1e-08 | At4g23160.1 | F21P8.50, protein kinase family protein, GO:0016301 [kinase activity]                                                                                                                                                     | Predicted transposon                      |
| 256500 | 257500 | E=6.3e-10 | At2g10050.1 | F7B19.19, zinc knuckle (CCHC-type) family protein, GO:0003676 [nucleic acid binding]                                                                                                                                      | Predicted transposon                      |
| 257000 | 258000 | E=2.4e-16 | At2g10090.1 | F7B19.23, hypothetical protein, GO:0005554 [molecular_function unknown]                                                                                                                                                   | Predicted transposon                      |
| 257500 | 258500 | E=1.1e-16 | At2g10090.1 | F7B19.23, hypothetical protein, GO:0005554 [molecular_function unknown]                                                                                                                                                   | Predicted transposon<br>Inserted fragment |
| 261000 | 262000 | E=5.7e-19 | At2g19960.1 | F6F22.1, hAT dimerisation domain-containing protein / transposase-related, GO:0005554 [molecular_function unknown]                                                                                                        | outside gene models                       |
| 265500 | 266500 | E=4.7e-10 | At2g16005.1 | F7H1.26, MD-2-related lipid recognition domain-containing protein / ML domain-containing protein, GO:0000004 [biological_process unknown] GO:0008372 [cellular_component unknown] GO:0005554 [molecular_function unknown] | Inserted fragment<br>outside gene models  |
| 266000 | 267000 | E=3.7e-16 | At3g43770.1 | T28A8.60, hypothetical protein, GO:0005554 [molecular_function unknown]                                                                                                                                                   | Predicted transposon                      |
| 266500 | 267500 | E=3.7e-16 | At3g43770.1 | T28A8.60, hypothetical protein, GO:0005554 [molecular_function unknown]                                                                                                                                                   | Predicted transposon<br>Inserted fragment |
| 276000 | 277000 | E=1.9e-13 | At5g04260.1 | F21E1.180, thioredoxin family protein, GO:0030508 [thiol-disulfide exchange intermediate activity]                                                                                                                        | outside gene models<br>Inserted fragment  |
| 276500 | 277500 | E=1.9e-13 | At5g04260.1 | F21E1.180, thioredoxin family protein, GO:0030508 [thiol-disulfide exchange intermediate activity]                                                                                                                        | outside gene models<br>Inserted fragment  |
| 277000 | 278000 | E=2.0e-06 | At3g07790.1 | MLP3.24, DGCR14-related, GO:0005554 [molecular_function unknown]                                                                                                                                                          | outside gene models                       |
| 277500 | 278500 | E=1.3e-37 | At5g47390.1 | MQL5.25, myb family transcription factor, GO:0003677 [DNA binding] GO:0003700 [transcription factor activity]                                                                                                             | Conserved collinear gene                  |
| 278000 | 279000 | E=1.5e-73 | At5g47390.1 | MQL5.25, myb family transcription factor, GO:0003677 [DNA binding] GO:0003700 [transcription factor activity]                                                                                                             | Conserved collinear gene                  |
| 278500 | 279500 | E=4.3e-77 | At5g47390.1 | MQL5.25, myb family transcription factor, GO:0003677 [DNA binding] GO:0003700 [transcription factor activity]                                                                                                             | Conserved collinear gene                  |
| 279000 | 280000 | E=3.5e-41 | At5g47390.1 | MQL5.25, myb family transcription factor, GO:0003677 [DNA binding] GO:0003700 [transcription factor activity]                                                                                                             | Conserved collinear gene                  |
| 285000 | 286000 | E=2.6e-   | At5g32482.1 | T15F17.6, zinc knuckle (CCHC-type) family protein, GO:0003676                                                                                                                                                             | Predicted                                 |

|        |        |           |             |                                                                                                                                                                                                           |                          |
|--------|--------|-----------|-------------|-----------------------------------------------------------------------------------------------------------------------------------------------------------------------------------------------------------|--------------------------|
|        |        | 22        |             | [nucleic acid binding]                                                                                                                                                                                    | transposon               |
| 285500 | 286500 | E=1.6e-51 | At5g32482.1 | T15F17.6, zinc knuckle (CCHC-type) family protein, GO:0003676                                                                                                                                             | Predicted transposon     |
| 286000 | 287000 | E=3.1e-27 | At5g32482.1 | [nucleic acid binding]<br>T15F17.6, zinc knuckle (CCHC-type) family protein, GO:0003676                                                                                                                   | Predicted transposon     |
|        |        |           |             |                                                                                                                                                                                                           | Inserted fragment        |
| 290500 | 291500 | E=7.0e-11 | At1g70410.3 | F17O7.5, carbonic anhydrase, putative / carbonate dehydratase, putative, GO:0015976 [carbon utilization] GO:0008270 [zinc ion binding] GO:0004089 [carbonate dehydratase activity]                        | outside gene models      |
| 291000 | 292000 | E=2.6e-14 | At4g17440.1 | FCAALL.6, expressed protein, GO:0005554 [molecular_function unknown]                                                                                                                                      | Conserved collinear gene |
| 291500 | 292500 | E=2.1e-57 | At4g17440.1 | FCAALL.6, expressed protein, GO:0005554 [molecular_function unknown]                                                                                                                                      | Conserved collinear gene |
| 292000 | 293000 | E=1.3e-44 | At4g17440.1 | FCAALL.6, expressed protein, GO:0005554 [molecular_function unknown]                                                                                                                                      | Conserved collinear gene |
| 294000 | 295000 | E=2.7e-17 | At5g47225.1 | MQL5.8, hypothetical protein, GO:0005554 [molecular_function unknown]                                                                                                                                     | Predicted transposon     |
| 294500 | 295500 | E=1.4e-10 | At5g47225.1 | MQL5.8, hypothetical protein, GO:0005554 [molecular_function unknown]                                                                                                                                     | Predicted transposon     |
|        |        |           |             |                                                                                                                                                                                                           |                          |
| 295000 | 296000 | E=9.8e-15 | At4g29090.1 | F25O24.5, reverse transcriptase, putative / RNA-dependent DNA polymerase, putative, GO:0003723 [RNA binding] GO:0003964 [RNA-directed DNA polymerase activity] GO:0006278 [RNA dependent DNA replication] | Predicted transposon     |
|        |        |           |             |                                                                                                                                                                                                           |                          |
| 295500 | 296500 | E=3.6e-08 | At4g29090.1 | F25O24.5, reverse transcriptase, putative / RNA-dependent DNA polymerase, putative, GO:0003723 [RNA binding] GO:0003964 [RNA-directed DNA polymerase activity] GO:0006278 [RNA dependent DNA replication] | Predicted transposon     |
| 298500 | 299500 | E=2.5e-19 | At2g15550.1 | F9O13.10, hypothetical protein, GO:0005554 [molecular_function unknown]                                                                                                                                   | Predicted transposon     |
| 299000 | 300000 | E=3.6e-13 | At2g15550.1 | F9O13.10, hypothetical protein, GO:0005554 [molecular_function unknown]                                                                                                                                   | Predicted transposon     |
| 300500 | 301500 | E=4.8e-12 | At2g05950.1 | T6P5.15, hypothetical protein, GO:0005554 [molecular_function unknown]                                                                                                                                    | Predicted transposon     |
| 301000 | 302000 | E=4.3e-12 | At2g05950.1 | T6P5.15, hypothetical protein, GO:0005554 [molecular_function unknown]                                                                                                                                    | Predicted transposon     |
| 309000 | 310000 | E=3.9e-12 | At2g05950.1 | T6P5.15, hypothetical protein, GO:0005554 [molecular_function unknown]                                                                                                                                    | Predicted transposon     |
|        |        |           |             |                                                                                                                                                                                                           | Inserted fragment        |
| 314500 | 315500 | E=7.5e-08 | At2g31700.1 | T9H9.22, hypothetical protein, GO:0005554 [molecular_function unknown]                                                                                                                                    | outside gene models      |

|        |        |            |             |                                                                                                                                                                                                                          |                                               |
|--------|--------|------------|-------------|--------------------------------------------------------------------------------------------------------------------------------------------------------------------------------------------------------------------------|-----------------------------------------------|
| 315000 | 316000 | E=7.5e-08  | At2g31700.1 | T9H9.22, hypothetical protein, GO:0005554 [molecular_function unknown]                                                                                                                                                   | Inserted fragment outside gene models         |
| 321500 | 322500 | E=1.2e-21  | At4g17460.1 | FCAALL.65, homeobox-leucine zipper protein 1 (HAT1) / HD-ZIP protein 1, GO:0005634 [nucleus] GO:0003677 [DNA binding] GO:0006355 [regulation of transcription, DNA-dependent] GO:0003700 [transcription factor activity] | Conserved collinear gene                      |
| 322000 | 323000 | E=1.5e-64  | At4g17460.1 | FCAALL.65, homeobox-leucine zipper protein 1 (HAT1) / HD-ZIP protein 1, GO:0005634 [nucleus] GO:0003677 [DNA binding] GO:0006355 [regulation of transcription, DNA-dependent] GO:0003700 [transcription factor activity] | Conserved collinear gene                      |
| 322500 | 323500 | E=2.7e-111 | At4g17460.1 | FCAALL.65, homeobox-leucine zipper protein 1 (HAT1) / HD-ZIP protein 1, GO:0005634 [nucleus] GO:0003677 [DNA binding] GO:0006355 [regulation of transcription, DNA-dependent] GO:0003700 [transcription factor activity] | Conserved collinear gene                      |
| 323000 | 324000 | E=8.8e-43  | At4g17460.1 | FCAALL.65, homeobox-leucine zipper protein 1 (HAT1) / HD-ZIP protein 1, GO:0005634 [nucleus] GO:0003677 [DNA binding] GO:0006355 [regulation of transcription, DNA-dependent] GO:0003700 [transcription factor activity] | Conserved collinear gene<br>Inserted fragment |
| 324000 | 325000 | E=8.0e-08  | At5g53740.1 | MGN6.10, hypothetical protein, GO:0005554 [molecular_function unknown]                                                                                                                                                   | outside gene models                           |
| 325000 | 326000 | E=5.4e-35  | At4g17480.1 | FCAALL.380, palmitoyl protein thioesterase family protein, GO:0008474 [palmitoyl-(protein) hydrolase activity]                                                                                                           | Conserved collinear gene                      |
| 325500 | 326500 | E=9.9e-47  | At4g17480.1 | FCAALL.380, palmitoyl protein thioesterase family protein, GO:0008474 [palmitoyl-(protein) hydrolase activity]                                                                                                           | Conserved collinear gene                      |
| 326000 | 327000 | E=1.3e-60  | At4g17480.1 | FCAALL.380, palmitoyl protein thioesterase family protein, GO:0008474 [palmitoyl-(protein) hydrolase activity]                                                                                                           | Conserved collinear gene                      |
| 326500 | 327500 | E=1.8e-44  | At4g17480.1 | FCAALL.380, palmitoyl protein thioesterase family protein, GO:0008474 [palmitoyl-(protein) hydrolase activity]                                                                                                           | Conserved collinear gene                      |
| 329000 | 330000 | E=1.7e-29  | At4g02920.1 | T5J8.24, expressed protein, GO:0005554 [molecular_function unknown]                                                                                                                                                      | Inserted fragment within model                |
| 329500 | 330500 | E=5.3e-28  | At4g02920.1 | T5J8.24, expressed protein, GO:0005554 [molecular_function unknown]                                                                                                                                                      | Inserted fragment within model                |
| 333000 | 334000 | E=8.2e-38  | At4g17480.1 | FCAALL.380, palmitoyl protein thioesterase family protein, GO:0008474 [palmitoyl-(protein) hydrolase activity]                                                                                                           | Conserved collinear gene                      |
| 333500 | 334500 | E=3.0e-    | At4g17480.1 | FCAALL.380, palmitoyl protein thioesterase family protein, GO:0008474                                                                                                                                                    | Conserved                                     |

|        |        |           |             |                                                                       |                          |
|--------|--------|-----------|-------------|-----------------------------------------------------------------------|--------------------------|
|        |        | 52        |             | [palmitoyl-(protein) hydrolase activity]                              | collinear gene           |
| 334000 | 335000 | E=3.2e-60 | At4g17480.1 | FCAALL.380, palmitoyl protein thioesterase family protein, GO:0008474 | Conserved collinear gene |
| 334500 | 335500 | E=2.0e-33 | At4g17480.1 | FCAALL.380, palmitoyl protein thioesterase family protein, GO:0008474 | Conserved collinear gene |

CONTIG G

| Start | Stop  | Score     | BLASTn hit  | Description                                                                                                                                                                                                             | Classification                 |
|-------|-------|-----------|-------------|-------------------------------------------------------------------------------------------------------------------------------------------------------------------------------------------------------------------------|--------------------------------|
| 3000  | 4000  | E=5.4e-20 | At1g33980.1 | F12G12.20, Smg-4/UPF3 family protein, GO:0005554 [molecular_function unknown]                                                                                                                                           | Inserted fragment within model |
| 3500  | 4500  | E=6.2e-26 | At1g33980.1 | F12G12.20, Smg-4/UPF3 family protein, GO:0005554 [molecular_function unknown]                                                                                                                                           | Inserted fragment within model |
| 6000  | 7000  | E=2.5e-10 | At5g03710.1 | F17C15.130, hypothetical protein, GO:0005554 [molecular_function unknown]                                                                                                                                               | Inserted fragment within model |
| 6500  | 7500  | E=5.8e-12 | At3g30190.1 | MIL15.1, hypothetical protein, GO:0000004 [biological_process unknown] GO:0008372 [cellular_component unknown] GO:0005554 [molecular_function unknown]                                                                  | Inserted fragment within model |
| 15500 | 16500 | E=4.9e-27 | At2g40680.1 | T7D17.14, hypothetical protein, GO:0005554 [molecular_function unknown]                                                                                                                                                 | Inserted fragment within model |
| 16000 | 17000 | E=4.0e-39 | At1g43570.1 | T10P12.5, hypothetical protein, GO:0005554 [molecular_function unknown]                                                                                                                                                 | Inserted fragment within model |
| 16500 | 17500 | E=1.8e-18 | At1g43570.1 | T10P12.5, hypothetical protein, GO:0005554 [molecular_function unknown]                                                                                                                                                 | Inserted fragment within model |
| 17000 | 18000 | E=5.6e-13 | At5g05980.1 | K18J17.17, dihydrofolate synthetase/folylpolyglutamate synthetase (DHFS/FPGS2), GO:0006730 [one-carbon compound metabolism] GO:0004326 [tetrahydrofolylpolyglutamate synthase activity] GO:0009570 [chloroplast stroma] | Inserted fragment within model |
| 17500 | 18500 | E=4.4e-31 | At5g05980.1 | K18J17.17, dihydrofolate synthetase/folylpolyglutamate synthetase (DHFS/FPGS2), GO:0006730 [one-carbon compound metabolism] GO:0004326 [tetrahydrofolylpolyglutamate synthase activity] GO:0009570 [chloroplast stroma] | Inserted fragment within model |
| 18000 | 19000 | E=3.6e-44 | At5g05980.1 | K18J17.17, dihydrofolate synthetase/folylpolyglutamate synthetase (DHFS/FPGS2), GO:0006730 [one-carbon compound metabolism] GO:0004326 [tetrahydrofolylpolyglutamate synthase activity]                                 | Inserted fragment within model |

|       |       |         |             |                                                                                                                                 |                |
|-------|-------|---------|-------------|---------------------------------------------------------------------------------------------------------------------------------|----------------|
|       |       |         |             | GO:0009570 [chloroplast stroma]                                                                                                 |                |
|       |       |         |             | K18J17.17, dihydrofolate synthetase/folylpolyglutamate synthetase (DHFS/FPGS2), GO:0006730 [one-carbon compound metabolism]     | Inserted       |
|       |       | E=5.0e- |             | GO:0004326 [tetrahydrofolylpolyglutamate synthase activity]                                                                     | fragment       |
| 18500 | 19500 | 21      | At5g05980.1 | GO:0009570 [chloroplast stroma]                                                                                                 | within model   |
|       |       | E=3.2e- |             |                                                                                                                                 | Conserved      |
| 19500 | 20500 | 33      | At4g17690.1 | FCAALL.96, peroxidase, putative, GO:0004601 [peroxidase activity]                                                               | collinear gene |
|       |       | E=1.7e- |             |                                                                                                                                 | Conserved      |
| 20000 | 21000 | 99      | At4g17690.1 | FCAALL.96, peroxidase, putative, GO:0004601 [peroxidase activity]                                                               | collinear gene |
|       |       | E=2.7e- |             |                                                                                                                                 | Conserved      |
| 20500 | 21500 | 101     | At4g17690.1 | FCAALL.96, peroxidase, putative, GO:0004601 [peroxidase activity]                                                               | collinear gene |
|       |       | E=7.5e- |             |                                                                                                                                 | Conserved      |
| 21000 | 22000 | 35      | At4g17690.1 | FCAALL.96, peroxidase, putative, GO:0004601 [peroxidase activity]                                                               | collinear gene |
|       |       | E=4.7e- |             |                                                                                                                                 | Conserved      |
| 22000 | 23000 | 16      | At4g17695.1 | FCAALL.94, myb family transcription factor (KAN3), GO:0003677 [DNA binding] GO:0003700 [transcription factor activity]          | collinear gene |
|       |       | E=4.7e- |             |                                                                                                                                 | Conserved      |
| 22500 | 23500 | 16      | At4g17695.1 | FCAALL.94, myb family transcription factor (KAN3), GO:0003677 [DNA binding] GO:0003700 [transcription factor activity]          | collinear gene |
|       |       | E=9.8e- |             |                                                                                                                                 | Conserved      |
| 23000 | 24000 | 11      | At4g17695.1 | FCAALL.94, myb family transcription factor (KAN3), GO:0003677 [DNA binding] GO:0003700 [transcription factor activity]          | collinear gene |
|       |       | E=2.1e- |             |                                                                                                                                 | Conserved      |
| 23500 | 24500 | 10      | At4g17695.1 | FCAALL.94, myb family transcription factor (KAN3), GO:0003677 [DNA binding] GO:0003700 [transcription factor activity]          | collinear gene |
|       |       | E=6.2e- |             |                                                                                                                                 | Conserved      |
| 24000 | 25000 | 56      | At4g17695.1 | FCAALL.94, myb family transcription factor (KAN3), GO:0003677 [DNA binding] GO:0003700 [transcription factor activity]          | collinear gene |
|       |       | E=4.5e- |             |                                                                                                                                 | Conserved      |
| 24500 | 25500 | 56      | At4g17695.1 | FCAALL.94, myb family transcription factor (KAN3), GO:0003677 [DNA binding] GO:0003700 [transcription factor activity]          | collinear gene |
|       |       | E=7.2e- |             |                                                                                                                                 | Conserved      |
| 25000 | 26000 | 09      | At4g17695.1 | FCAALL.94, myb family transcription factor (KAN3), GO:0003677 [DNA binding] GO:0003700 [transcription factor activity]          | collinear gene |
|       |       | E=1.1e- |             |                                                                                                                                 | Predicted      |
| 39000 | 40000 | 06      | At4g23160.1 | F21P8.50, protein kinase family protein, GO:0016301 [kinase activity]                                                           | transposon     |
|       |       | E=7.5e- |             |                                                                                                                                 | Predicted      |
| 39500 | 40500 | 14      | At4g23160.1 | F21P8.50, protein kinase family protein, GO:0016301 [kinase activity]                                                           | transposon     |
|       |       | E=8.8e- |             |                                                                                                                                 | Conserved      |
| 44500 | 45500 | 99      | At4g17720.1 | FCAALL.73, RNA recognition motif (RRM)-containing protein, GO:0003676 [nucleic acid binding]                                    | collinear gene |
|       |       | E=8.1e- |             |                                                                                                                                 | Conserved      |
| 45000 | 46000 | 119     | At4g17720.1 | FCAALL.73, RNA recognition motif (RRM)-containing protein, GO:0003676 [nucleic acid binding]                                    | collinear gene |
|       |       | E=4.8e- |             |                                                                                                                                 | Conserved      |
| 45500 | 46500 | 44      | At4g17720.1 | FCAALL.73, RNA recognition motif (RRM)-containing protein, GO:0003676 [nucleic acid binding]                                    | collinear gene |
|       |       | E=8.7e- |             |                                                                                                                                 | Conserved      |
| 46500 | 47500 | 21      | At4g17730.1 | FCAALL.117, syntaxin 23 (SYP23) / PEP12-like protein, GO:0006944 [membrane fusion] GO:0006886 [intracellular protein transport] | collinear gene |
|       |       | E=6.8e- |             |                                                                                                                                 | Conserved      |
| 47000 | 48000 |         | At4g17730.1 | GO:0005486 [t-SNARE activity]                                                                                                   |                |
|       |       |         |             | FCAALL.117, syntaxin 23 (SYP23) / PEP12-like protein, GO:0006944                                                                | Conserved      |

|       |       |           |             |                                                                                                                                                                                                                                                                                                      |                          |
|-------|-------|-----------|-------------|------------------------------------------------------------------------------------------------------------------------------------------------------------------------------------------------------------------------------------------------------------------------------------------------------|--------------------------|
|       |       | 69        |             | [membrane fusion] GO:0006886 [intracellular protein transport] GO:0005486 [t-SNARE activity]                                                                                                                                                                                                         | collinear gene           |
| 47500 | 48500 | E=1.8e-69 | At4g17730.1 | FCAALL.117, syntaxin 23 (SYP23) / PEP12-like protein, GO:0006944 [membrane fusion] GO:0006886 [intracellular protein transport] GO:0005486 [t-SNARE activity]                                                                                                                                        | Conserved collinear gene |
| 48000 | 49000 | E=6.7e-32 | At5g46860.1 | MSD23.9, syntaxin 22 (SYP22) (VAM3), GO:0030140 [trans-Golgi network transport vesicle] GO:0005770 [late endosome] GO:0006944 [membrane fusion] GO:0009705 [vacuolar membrane (sensu Magnoliophyta)] GO:0006886 [intracellular protein transp                                                        | Conserved collinear gene |
| 48500 | 49500 | E=1.6e-41 | At4g17750.1 | FCAALL.107, heat shock factor protein 1 (HSF1) / heat shock transcription factor 1 (HSTF1), GO:0003677 [DNA binding] GO:0006355 [regulation of transcription, DNA-dependent] GO:0009408 [response to heat] GO:0008372 [cellular_component unknown] GO:0005515 [protein binding] GO:0003700 [transcri | Conserved collinear gene |
| 49000 | 50000 | E=2.6e-49 | At4g17750.1 | FCAALL.107, heat shock factor protein 1 (HSF1) / heat shock transcription factor 1 (HSTF1), GO:0003677 [DNA binding] GO:0006355 [regulation of transcription, DNA-dependent] GO:0009408 [response to heat] GO:0008372 [cellular_component unknown] GO:0005515 [protein binding] GO:0003700 [transcri | Conserved collinear gene |
| 49500 | 50500 | E=7.5e-78 | At4g17750.1 | FCAALL.107, heat shock factor protein 1 (HSF1) / heat shock transcription factor 1 (HSTF1), GO:0003677 [DNA binding] GO:0006355 [regulation of transcription, DNA-dependent] GO:0009408 [response to heat] GO:0008372 [cellular_component unknown] GO:0005515 [protein binding] GO:0003700 [transcri | Conserved collinear gene |
| 50000 | 51000 | E=7.1e-68 | At4g17750.1 | FCAALL.107, heat shock factor protein 1 (HSF1) / heat shock transcription factor 1 (HSTF1), GO:0003677 [DNA binding] GO:0006355 [regulation of transcription, DNA-dependent] GO:0009408 [response to heat] GO:0008372 [cellular_component unknown] GO:0005515 [protein binding] GO:0003700 [transcri | Conserved collinear gene |
| 50500 | 51500 | E=4.3e-13 | At4g17750.1 | GO:0005515 [protein binding] GO:0003700 [transcri                                                                                                                                                                                                                                                    | Conserved collinear gene |
| 52500 | 53500 | E=2.5e-06 | At3g25270.1 | MJL12.23, hypothetical protein, GO:0005554 [molecular_function unknown]                                                                                                                                                                                                                              | Predicted transposon     |
| 53000 | 54000 | E=1.1e-17 | At2g02650.1 | T8K22.5, reverse transcriptase-related, GO:0005554 [molecular_function unknown]                                                                                                                                                                                                                      | Predicted transposon     |
| 53500 | 54500 | E=7.8e-07 | At2g02650.1 | T8K22.5, reverse transcriptase-related, GO:0005554 [molecular_function unknown]                                                                                                                                                                                                                      | Predicted transposon     |
| 54000 | 55000 | E=1.6e-   | At4g17760.1 | FCAALL.108, expressed protein, GO:0005554 [molecular_function                                                                                                                                                                                                                                        | Predicted                |



|       |       |            |             |                                                                                                                                                                                                                                                                                                   |                                |
|-------|-------|------------|-------------|---------------------------------------------------------------------------------------------------------------------------------------------------------------------------------------------------------------------------------------------------------------------------------------------------|--------------------------------|
|       |       | 09         |             | unknown]                                                                                                                                                                                                                                                                                          | transposon                     |
| 54500 | 55500 | E=2.6e-45  | At4g16015.1 | FCAALL.263, DC1 domain-containing protein, GO:0005554 [molecular_function unknown]                                                                                                                                                                                                                | Predicted transposon           |
| 55000 | 56000 | E=3.9e-110 | At4g16015.1 | FCAALL.263, DC1 domain-containing protein, GO:0005554 [molecular_function unknown]                                                                                                                                                                                                                | Predicted transposon           |
| 55500 | 56500 | E=3.4e-136 | At4g16015.1 | FCAALL.263, DC1 domain-containing protein, GO:0005554 [molecular_function unknown]                                                                                                                                                                                                                | Predicted transposon           |
| 56000 | 57000 | E=9.5e-99  | At4g16015.1 | FCAALL.263, DC1 domain-containing protein, GO:0005554 [molecular_function unknown]                                                                                                                                                                                                                | Predicted transposon           |
| 56500 | 57500 | E=1.3e-21  | At4g16015.1 | FCAALL.263, DC1 domain-containing protein, GO:0005554 [molecular_function unknown]                                                                                                                                                                                                                | Predicted transposon           |
| 62000 | 63000 | E=1.0e-11  | At2g05950.1 | T6P5.15, hypothetical protein, GO:0005554 [molecular_function unknown]                                                                                                                                                                                                                            | Predicted transposon           |
| 62500 | 63500 | E=1.0e-11  | At2g05950.1 | T6P5.15, hypothetical protein, GO:0005554 [molecular_function unknown]                                                                                                                                                                                                                            | Predicted transposon           |
| 71000 | 72000 | E=2.1e-14  | At1g36670.1 | T15P17.10, hypothetical protein, GO:0005554 [molecular_function unknown]                                                                                                                                                                                                                          | Inserted fragment within model |
| 71500 | 72500 | E=9.4e-28  | At1g36670.1 | T15P17.10, hypothetical protein, GO:0005554 [molecular_function unknown]                                                                                                                                                                                                                          | Inserted fragment within model |
| 74500 | 75500 | E=1.5e-42  | At5g49790.1 | K2I5.16, hypothetical protein, GO:0005554 [molecular_function unknown]                                                                                                                                                                                                                            | Inserted fragment within model |
| 75000 | 76000 | E=1.5e-42  | At5g49790.1 | K2I5.16, hypothetical protein, GO:0005554 [molecular_function unknown]                                                                                                                                                                                                                            | Inserted fragment within model |
| 75500 | 76500 | E=9.2e-31  | At4g17770.1 | FCAALL.9, glycosyl transferase family 20 protein / trehalose-phosphatase family protein, GO:0005992 [trehalose biosynthesis] GO:0004805 [trehalose-phosphatase activity] GO:0016757 [transferase activity, transferring glycosyl groups] GO:0003825 [alpha,alpha-trehalose-phosphate synthase (UD | Conserved collinear gene       |
| 76000 | 77000 | E=6.8e-75  | At4g17770.1 | FCAALL.9, glycosyl transferase family 20 protein / trehalose-phosphatase family protein, GO:0005992 [trehalose biosynthesis] GO:0004805 [trehalose-phosphatase activity] GO:0016757 [transferase activity, transferring glycosyl groups] GO:0003825 [alpha,alpha-trehalose-phosphate synthase (UD | Conserved collinear gene       |
| 76500 | 77500 | E=1.8e-109 | At4g17770.1 | FCAALL.9, glycosyl transferase family 20 protein / trehalose-phosphatase family protein, GO:0005992 [trehalose biosynthesis] GO:0004805 [trehalose-phosphatase activity] GO:0016757 [transferase activity, transferring glycosyl groups] GO:0003825 [alpha,alpha-                                 | Conserved collinear gene       |

|        |        |           |             |                                                                                                                                                                                                                                                                                                                                          |                                       |
|--------|--------|-----------|-------------|------------------------------------------------------------------------------------------------------------------------------------------------------------------------------------------------------------------------------------------------------------------------------------------------------------------------------------------|---------------------------------------|
| 77000  | 78000  | E=2.0e-52 | At4g17770.1 | trehalose-phosphate synthase (UD<br>FCAALL.9, glycosyl transferase family 20 protein / trehalose-phosphatase family protein, GO:0005992 [trehalose biosynthesis]<br>GO:0004805 [trehalose-phosphatase activity] GO:0016757 [transferase activity, transferring glycosyl groups] GO:0003825 [alpha,alpha-trehalose-phosphate synthase (UD | Conserved collinear gene              |
| 77500  | 78500  | E=3.0e-29 | At4g17785.1 | FCAALL.109, myb family transcription factor (MYB39), GO:0003677 [DNA binding] GO:0006355 [regulation of transcription, DNA-dependent] GO:0003700 [transcription factor activity]                                                                                                                                                         | Conserved collinear gene              |
| 78000  | 79000  | E=2.0e-99 | At4g17785.1 | FCAALL.109, myb family transcription factor (MYB39), GO:0003677 [DNA binding] GO:0006355 [regulation of transcription, DNA-dependent] GO:0003700 [transcription factor activity]                                                                                                                                                         | Conserved collinear gene              |
| 78500  | 79500  | E=1.5e-96 | At4g17785.1 | FCAALL.109, myb family transcription factor (MYB39), GO:0003677 [DNA binding] GO:0006355 [regulation of transcription, DNA-dependent] GO:0003700 [transcription factor activity]                                                                                                                                                         | Conserved collinear gene              |
| 79000  | 80000  | E=8.3e-49 | At4g17785.1 | FCAALL.109, myb family transcription factor (MYB39), GO:0003677 [DNA binding] GO:0006355 [regulation of transcription, DNA-dependent] GO:0003700 [transcription factor activity]                                                                                                                                                         | Conserved collinear gene              |
| 79500  | 80500  | E=2.2e-15 | At4g17785.1 | FCAALL.109, myb family transcription factor (MYB39), GO:0003677 [DNA binding] GO:0006355 [regulation of transcription, DNA-dependent] GO:0003700 [transcription factor activity]                                                                                                                                                         | Conserved collinear gene              |
| 93000  | 94000  | E=8.4e-15 | At4g05145.1 | C17L7.18, hypothetical protein, GO:0005554 [molecular_function unknown]                                                                                                                                                                                                                                                                  | Inserted fragment within model        |
| 93500  | 94500  | E=1.4e-07 | At4g05145.1 | C17L7.18, hypothetical protein, GO:0005554 [molecular_function unknown]                                                                                                                                                                                                                                                                  | Inserted fragment within model        |
| 101000 | 102000 | E=1.4e-13 | At3g29785.1 | T26G12.25, hypothetical protein, GO:0005554 [molecular_function unknown]                                                                                                                                                                                                                                                                 | Predicted transposon                  |
| 101500 | 102500 | E=7.5e-39 | At3g29785.1 | T26G12.25, hypothetical protein, GO:0005554 [molecular_function unknown]                                                                                                                                                                                                                                                                 | Predicted transposon                  |
| 102000 | 103000 | E=9.6e-20 | At3g29785.1 | T26G12.25, hypothetical protein, GO:0005554 [molecular_function unknown]                                                                                                                                                                                                                                                                 | Predicted transposon                  |
| 104000 | 105000 | E=5.9e-10 | At4g23160.1 | F21P8.50, protein kinase family protein, GO:0016301 [kinase activity]                                                                                                                                                                                                                                                                    | Predicted transposon                  |
| 105000 | 106000 | E=6.6e-09 | At4g23160.1 | F21P8.50, protein kinase family protein, GO:0016301 [kinase activity]                                                                                                                                                                                                                                                                    | Predicted transposon                  |
| 107000 | 108000 | E=1.2e-06 | At5g03710.1 | F17C15.130, hypothetical protein, GO:0005554 [molecular_function unknown]                                                                                                                                                                                                                                                                | Inserted fragment outside gene models |

|        |        |            |             |                                                                                                                                                                 |                                |
|--------|--------|------------|-------------|-----------------------------------------------------------------------------------------------------------------------------------------------------------------|--------------------------------|
| 109500 | 110500 | E=2.1e-34  | At4g17790.1 | FCAALL.62, expressed protein, GO:0005554 [molecular_function unknown]                                                                                           | Conserved collinear gene       |
| 110000 | 111000 | E=2.8e-81  | At4g17790.1 | FCAALL.62, expressed protein, GO:0005554 [molecular_function unknown]                                                                                           | Conserved collinear gene       |
| 110500 | 111500 | E=2.4e-42  | At4g17790.1 | FCAALL.62, expressed protein, GO:0005554 [molecular_function unknown]                                                                                           | Conserved collinear gene       |
| 114000 | 115000 | E=1.3e-86  | At4g17800.1 | FCAALL.129, DNA-binding protein-related, GO:0005554 [molecular_function unknown]                                                                                | Conserved collinear gene       |
| 114500 | 115500 | E=3.7e-157 | At4g17800.1 | FCAALL.129, DNA-binding protein-related, GO:0005554 [molecular_function unknown]                                                                                | Conserved collinear gene       |
| 115000 | 116000 | E=4.7e-66  | At4g17800.1 | FCAALL.129, DNA-binding protein-related, GO:0005554 [molecular_function unknown]                                                                                | Conserved collinear gene       |
| 151000 | 152000 | E=1.0e-10  | At2g05950.1 | T6P5.15, hypothetical protein, GO:0005554 [molecular_function unknown]                                                                                          | Predicted transposon           |
| 151500 | 152500 | E=2.1e-09  | At2g05950.1 | T6P5.15, hypothetical protein, GO:0005554 [molecular_function unknown]                                                                                          | Predicted transposon           |
| 157500 | 158500 | E=4.2e-06  | At5g07570.1 | T2I1.280, glycine/proline-rich protein, GO:0000004 [biological_process unknown] GO:0008372 [cellular_component unknown] GO:0005554 [molecular_function unknown] | Inserted fragment within model |
| 158000 | 159000 | E=4.9e-19  | At4g01980.1 | T7B11.25, hypothetical protein, GO:0005554 [molecular_function unknown]                                                                                         | Inserted fragment within model |
| 158500 | 159500 | E=1.5e-15  | At4g01980.1 | T7B11.25, hypothetical protein, GO:0005554 [molecular_function unknown]                                                                                         | Inserted fragment within model |
| 160000 | 161000 | E=2.3e-28  | At3g15310.1 | K7L4.11, expressed protein, GO:0000004 [biological_process unknown] GO:0008372 [cellular_component unknown] GO:0005554 [molecular_function unknown]             | Inserted fragment within model |
| 160500 | 161500 | E=1.6e-89  | At3g15310.1 | K7L4.11, expressed protein, GO:0000004 [biological_process unknown] GO:0008372 [cellular_component unknown] GO:0005554 [molecular_function unknown]             | Inserted fragment within model |
| 161000 | 162000 | E=1.6e-72  | At5g32621.1 | F15I15.2, expressed protein, GO:0005554 [molecular_function unknown] GO:0000004 [biological_process unknown] GO:0008372 [cellular_component unknown]            | Inserted fragment within model |
| 161500 | 162500 | E=9.0e-09  | At5g32621.1 | F15I15.2, expressed protein, GO:0005554 [molecular_function unknown] GO:0000004 [biological_process unknown] GO:0008372 [cellular_component unknown]            | Inserted fragment within model |
| 169000 | 170000 | E=4.6e-26  | At5g28250.1 | T8M17.20, Ulp1 protease family protein, GO:0008234 [cysteine-type peptidase activity] GO:0006508 [proteolysis and peptidolysis]                                 | Inserted fragment within model |
| 170500 | 171500 | E=1.2e-    | At4g17810.1 | FCAALL.130, zinc finger (C2H2 type) family protein, GO:0003676                                                                                                  | Conserved                      |

|        |        |            |             |                                                                                                                                                                      |                                      |
|--------|--------|------------|-------------|----------------------------------------------------------------------------------------------------------------------------------------------------------------------|--------------------------------------|
|        |        | 59         |             | [nucleic acid binding] GO:0008270 [zinc ion binding] GO:0003700<br>[transcription factor activity]<br>FCAALL.130, zinc finger (C2H2 type) family protein, GO:0003676 | collinear gene                       |
| 171000 | 172000 | E=5.4e-82  | At4g17810.1 | [nucleic acid binding] GO:0008270 [zinc ion binding] GO:0003700<br>[transcription factor activity]<br>FCAALL.130, zinc finger (C2H2 type) family protein, GO:0003676 | Conserved<br>collinear gene          |
| 171500 | 172500 | E=6.2e-18  | At4g17810.1 | [nucleic acid binding] GO:0008270 [zinc ion binding] GO:0003700<br>[transcription factor activity]<br>FCAALL.130, zinc finger (C2H2 type) family protein, GO:0003676 | Conserved<br>collinear gene          |
| 177500 | 178500 | E=3.1e-53  | At4g17830.1 | FCAALL.133, peptidase M20/M25/M40 family protein, GO:0008237<br>[metallopeptidase activity] GO:0006508 [proteolysis and peptidolysis]                                | Conserved<br>collinear gene          |
| 178000 | 179000 | E=5.8e-103 | At4g17830.1 | FCAALL.133, peptidase M20/M25/M40 family protein, GO:0008237<br>[metallopeptidase activity] GO:0006508 [proteolysis and peptidolysis]                                | Conserved<br>collinear gene          |
| 178500 | 179500 | E=8.7e-79  | At4g17830.1 | FCAALL.133, peptidase M20/M25/M40 family protein, GO:0008237<br>[metallopeptidase activity] GO:0006508 [proteolysis and peptidolysis]                                | Conserved<br>collinear gene          |
| 179000 | 180000 | E=4.7e-61  | At4g17830.1 | FCAALL.133, peptidase M20/M25/M40 family protein, GO:0008237<br>[metallopeptidase activity] GO:0006508 [proteolysis and peptidolysis]                                | Conserved<br>collinear gene          |
| 179500 | 180500 | E=4.4e-41  | At4g17830.1 | FCAALL.133, peptidase M20/M25/M40 family protein, GO:0008237<br>[metallopeptidase activity] GO:0006508 [proteolysis and peptidolysis]                                | Conserved<br>collinear gene          |
| 180000 | 181000 | E=7.0e-83  | At4g17840.1 | T6K21.20, expressed protein, GO:0005554 [molecular_function<br>unknown]                                                                                              | Conserved<br>collinear gene          |
| 180500 | 181500 | E=1.5e-45  | At2g35260.1 | T4C15.7, expressed protein, GO:0005554 [molecular_function<br>unknown]                                                                                               | Conserved<br>collinear gene          |
| 181000 | 182000 | E=6.1e-31  | At4g17840.1 | T6K21.20, expressed protein, GO:0005554 [molecular_function<br>unknown]                                                                                              | Conserved<br>collinear gene          |
| 181500 | 182500 | E=6.1e-18  | At4g17840.1 | T6K21.20, expressed protein, GO:0005554 [molecular_function<br>unknown]                                                                                              | Conserved<br>collinear gene          |
| 184000 | 185000 | E=3.9e-12  | At2g05950.1 | T6P5.15, hypothetical protein, GO:0005554 [molecular_function<br>unknown]                                                                                            | Predicted<br>transposon              |
| 184500 | 185500 | E=3.9e-12  | At2g05950.1 | T6P5.15, hypothetical protein, GO:0005554 [molecular_function<br>unknown]                                                                                            | Predicted<br>transposon              |
| 189000 | 190000 | E=3.3e-07  | At4g17850.1 | T6K21.30, hypothetical protein, GO:0005554 [molecular_function<br>unknown]                                                                                           | Conserved<br>collinear gene          |
| 189500 | 190500 | E=2.1e-10  | At4g17850.1 | T6K21.30, hypothetical protein, GO:0005554 [molecular_function<br>unknown]                                                                                           | Conserved<br>collinear gene          |
| 199000 | 200000 | E=6.3e-10  | At4g17850.1 | T6K21.30, hypothetical protein, GO:0005554 [molecular_function<br>unknown]                                                                                           | Conserved<br>collinear gene          |
| 199500 | 200500 | E=1.7e-15  | At4g17850.1 | T6K21.30, hypothetical protein, GO:0005554 [molecular_function<br>unknown]                                                                                           | Conserved<br>collinear gene          |
| 204000 | 205000 | E=8.8e-11  | At3g43220.1 | F7K15.70, phosphoinositide phosphatase family protein, GO:0004439<br>[phosphoinositide 5-phosphatase activity]                                                       | Inserted<br>fragment<br>outside gene |

|        |        |           |             |                                                                                                                                     |                                                                                  |
|--------|--------|-----------|-------------|-------------------------------------------------------------------------------------------------------------------------------------|----------------------------------------------------------------------------------|
| 204500 | 205500 | E=8.8e-11 | At3g43220.1 | F7K15.70, phosphoinositide phosphatase family protein, GO:0004439 [phosphoinositide 5-phosphatase activity]                         | models<br>Inserted<br>fragment<br>outside gene<br>models<br>Inserted<br>fragment |
| 212500 | 213500 | E=6.0e-16 | At2g31700.1 | T9H9.22, hypothetical protein, GO:0005554 [molecular_function unknown]                                                              | outside gene<br>models<br>Inserted<br>fragment                                   |
| 213000 | 214000 | E=7.2e-07 | At2g31700.1 | T9H9.22, hypothetical protein, GO:0005554 [molecular_function unknown]                                                              | outside gene<br>models<br>Inserted<br>fragment                                   |
| 214000 | 215000 | E=2.1e-06 | At3g24255.1 | K13K6.3, expressed protein, GO:0005554 [molecular_function unknown]                                                                 | within model<br>Inserted<br>fragment                                             |
| 214500 | 215500 | E=8.3e-16 | At1g21330.1 | F24J8.25, hypothetical protein, GO:0005554 [molecular_function unknown]                                                             | within model<br>Inserted<br>fragment                                             |
| 215000 | 216000 | E=3.3e-10 | At4g36970.1 | AP22.30, remorin family protein, GO:0003677 [DNA binding]                                                                           | outside gene<br>models<br>Inserted<br>fragment                                   |
| 215500 | 216500 | E=3.3e-10 | At4g36970.1 | AP22.30, remorin family protein, GO:0003677 [DNA binding]                                                                           | outside gene<br>models<br>Inserted<br>fragment                                   |
| 218000 | 219000 | E=7.2e-16 | At4g20880.1 | T13K14.40, ethylene-responsive nuclear protein / ethylene-regulated nuclear protein (ERT2), GO:0005554 [molecular_function unknown] | within model<br>Inserted<br>fragment                                             |
| 218500 | 219500 | E=7.2e-16 | At4g20880.1 | T13K14.40, ethylene-responsive nuclear protein / ethylene-regulated nuclear protein (ERT2), GO:0005554 [molecular_function unknown] | within model<br>Inserted<br>fragment                                             |
| 223000 | 224000 | E=5.3e-32 | At4g17870.1 | T6K21.50, expressed protein, GO:0005554 [molecular_function unknown]                                                                | Conserved<br>collinear gene                                                      |
| 223500 | 224500 | E=5.7e-86 | At4g17870.1 | T6K21.50, expressed protein, GO:0005554 [molecular_function unknown]                                                                | Conserved<br>collinear gene                                                      |
| 224000 | 225000 | E=2.7e-49 | At4g17870.1 | T6K21.50, expressed protein, GO:0005554 [molecular_function unknown]                                                                | Conserved<br>collinear gene                                                      |
| 226000 | 227000 | E=1.6e-07 | At3g32904.1 | T7B9.24, hypothetical protein, GO:0005554 [molecular_function unknown]                                                              | Inserted<br>fragment                                                             |

|        |        |            |             |                                                                                                                             |                                                 |
|--------|--------|------------|-------------|-----------------------------------------------------------------------------------------------------------------------------|-------------------------------------------------|
| 231500 | 232500 | E=7.7e-77  | At4g17880.1 | T6K21.60, basic helix-loop-helix (bHLH) family protein, GO:0003677 [DNA binding] GO:0003700 [transcription factor activity] | outside gene models<br>Conserved collinear gene |
| 232000 | 233000 | E=1.5e-115 | At4g17880.1 | T6K21.60, basic helix-loop-helix (bHLH) family protein, GO:0003677 [DNA binding] GO:0003700 [transcription factor activity] | Conserved collinear gene                        |
| 232500 | 233500 | E=2.3e-103 | At4g17880.1 | T6K21.60, basic helix-loop-helix (bHLH) family protein, GO:0003677 [DNA binding] GO:0003700 [transcription factor activity] | Conserved collinear gene                        |
| 233000 | 234000 | E=5.7e-94  | At4g17880.1 | T6K21.60, basic helix-loop-helix (bHLH) family protein, GO:0003677 [DNA binding] GO:0003700 [transcription factor activity] | Conserved collinear gene                        |
| 233500 | 234500 | E=1.1e-33  | At4g17880.1 | T6K21.60, basic helix-loop-helix (bHLH) family protein, GO:0003677 [DNA binding] GO:0003700 [transcription factor activity] | Conserved collinear gene                        |
